# Supplementary material for: Frequency of Antimicrobial Resistance Genes in Salmonella From Brazil by in silico Whole-Genome Sequencing Analysis: An Overview of the Last Four Decades
Source: Front Microbiol. 2020 Aug 7;11:1864. doi: 10.3389/fmicb.2020.01864 (PMC7426471; doi:10.3389/fmicb.2020.01864)
Supplement: TABLE S1 — National Biotechnology Information Center original metadata information associated with the detection of antimicrobial resistance genes and the phenotypic resistance prediction of Salmonella genomes within the five strain’s source groups. The numbers 0 and 1 mean the absence and the presence, respectively. [file Table_1.XLSX]

## Sheet: S1
SampleID	Strain Name	Strain Isolation Source	Source Group	Collected year	Organism	Subspecies by cgMLST	Serovar by NCBI	Serovar by in silico SISTR	Resistance genes	aac(3)-IIa	aac(3)-IId	aac(3)-IV	aac(3)-VIa	aac(6')-Ib	aph(3')-Ia	aph(3')-IIa	aph(3'')-Ib	aph(4)-Ia	aph(6)-Ic	aph(6)-Id	ant(2'')-Ia	ant(3'')-Ia	aadA1	aadA2	aadA5	aadA12	aadA22	dfrA1	dfrA7	dfrA8	dfrA12	dfrA15	dfrA17	dfrA25	blaCMY-2	blaCMY-18	blaCMY-33	blaCMY-44	blaCMY-54	blaCTX-M-2	blaCTX-M-8	blaCTX-M-56	blaCTX-M-97	blaTEM-1A	blaTEM-1B	blaTEM-116	blaTEM-220	blaTEM-229	blaOXA-4
SRR1188451	FMA0190	frz. lobster tails	animal-based food	2011	Salmonella enterica	enterica	13:-:-	Albany	>>>>>>>>>>>>	0	0	0	0	0	0	0	0	0	0	0	0	0	0	0	0	0	0	0	0	0	0	0	0	0	0	0	0	0	0	0	0	0	0	0	0	0	0	0	0
SRR1411131	FCC0198	brazilian black pepper	food	2008	Salmonella enterica	enterica	Javiana	Poona	>>>>>>>>>>>>	0	0	0	0	0	0	0	0	0	0	0	0	0	0	0	0	0	0	0	0	0	0	0	0	0	0	0	0	0	0	0	0	0	0	0	0	0	0	0	0
SRR1411175	FMA0200	lobster tails frz	animal-based food	2011	Salmonella enterica	enterica	Typhimurium	Typhimurium	>>>>>>>>>>>>	0	0	0	0	0	0	0	0	0	0	0	0	0	0	0	0	0	0	0	0	0	0	0	0	0	0	0	0	0	0	0	0	0	0	0	0	0	0	0	0
SRR1622988	FDA00004719	pet treat bacon stuffed	animal-based food	2010	Salmonella enterica	enterica	I 319:-	Give	>>>>>>>>>>>>	0	0	0	0	0	0	0	0	0	0	0	0	0	0	0	0	0	0	0	0	0	0	0	0	0	0	0	0	0	0	0	0	0	0	0	0	0	0	0	0
SRR1633505	FDA00000998	frz rock lobster tails	animal-based food	2006	Salmonella enterica	enterica	Baguida	Javiana	>>>>>>>>>>>>	0	0	0	0	0	0	0	0	0	0	0	0	0	0	0	0	0	0	0	0	0	0	0	0	0	0	0	0	0	0	0	0	0	0	0	0	0	0	0	0
SRR1705570	FDA00001002	lobster tails	animal-based food	2006	Salmonella enterica	enterica	Madelia	Give	>>>>>>>>>>>>	0	0	0	0	0	0	0	0	0	0	0	0	0	0	0	0	0	0	0	0	0	0	0	0	0	0	0	0	0	0	0	0	0	0	0	0	0	0	0	0
SRR1705586	FDA00001045	frz lobster tails	animal-based food	2006	Salmonella enterica	enterica	Baguida	London	>>>>>>>>>>>>	0	0	0	0	0	0	0	0	0	0	0	0	0	0	0	0	0	0	0	0	0	0	0	0	0	0	0	0	0	0	0	0	0	0	0	0	0	0	0	0
SRR1726167	FDA00001055	lobster tail	animal-based food	2006	Salmonella enterica	enterica	Abaetetuba	Agona	>>>>>>>>>>>>	0	0	0	0	0	0	0	0	0	0	0	0	0	0	0	0	0	0	0	0	0	0	0	0	0	0	0	0	0	0	0	0	0	0	0	0	0	0	0	0
SRR1732577	FDA00000624	shrimp	animal-based food	2004	Salmonella enterica	enterica	II 48:gmt:- (Erlangen)	Senftenberg	>>>>>>>>>>>>	0	0	0	0	0	0	0	0	0	0	0	0	0	0	0	0	0	0	0	0	0	0	0	0	0	0	0	0	0	0	0	0	0	0	0	0	0	0	0	0
SRR1732578	FDA00004674	pet treat beef treat	animal-based food	2010	Salmonella enterica	enterica	O--:gmst:-	Senftenberg	>>>>>>>>>>>>	0	0	0	0	0	0	0	0	0	0	0	0	0	0	0	0	0	0	0	0	0	0	0	0	0	0	0	0	0	0	0	0	0	0	0	0	0	0	0	0
SRR1805645	FDA00010522	FROZEN SHELL ON SHRIMP	animal-based food	2001	Salmonella enterica	enterica	Florian	Madelia	>>>>>>>>>>>>	0	0	0	0	0	0	0	0	0	0	0	0	0	0	0	0	0	0	0	0	0	0	0	0	0	0	0	0	0	0	0	0	0	0	0	0	0	0	0	0
SRR1805681	FDA00000807	bacon flavored bones	animal-based food	2005	Salmonella enterica	enterica	Infantis	Infantis	>>>>>>>>>>>>	0	0	0	0	0	0	0	0	0	0	0	0	0	0	0	0	0	0	0	0	0	0	0	0	0	0	0	0	0	0	0	0	0	0	0	0	0	0	0	0
SRR1918993	ADRDL-787	Meat Meal	animal-based food	2008	Salmonella enterica	enterica	[6][14]18:z4z23:[15]	Abaetetuba	>>>>>>>>>>>>	0	0	0	0	0	0	0	0	0	0	0	0	0	0	0	0	0	0	0	0	0	0	0	0	0	0	0	0	0	0	0	0	0	0	0	0	0	0	0	0
SRR1950246	FDAARGOS_54	environmental	environment	Missing	Salmonella enterica	enterica	Heidelberg	Heidelberg	>>>>>>>>>>>>	0	0	0	0	0	0	0	0	0	0	0	0	0	0	0	0	0	0	0	0	0	0	0	0	0	0	0	0	0	0	0	0	0	0	0	1	0	0	0	0
SRR1950247	FDAARGOS_54	environmental	environment	Missing	Salmonella enterica	enterica	Heidelberg	Heidelberg	>>>>>>>>>>>>	0	0	0	0	0	0	0	0	0	0	0	0	0	0	0	0	0	0	0	0	0	0	0	0	0	0	0	0	0	0	0	0	0	0	0	1	0	0	0	0
SRR1996222	NC_SA330	chicken carcass	animal-based food	2016	Salmonella enterica	enterica	Abony	Anatum	>>>>>>>>>>>>	0	0	0	0	0	0	0	0	0	0	0	0	0	0	0	0	0	0	0	0	0	0	0	0	0	0	0	0	0	0	0	0	0	0	0	0	0	0	0	0
SRR2005750	CFSAN031302	bovine milk	animal-based food	2007	Salmonella enterica	enterica	Infantis	Saintpaul	>>>>>>>>>>>>	0	0	0	0	0	0	0	0	0	0	0	0	0	0	0	0	0	0	0	0	0	0	0	0	0	0	0	0	0	0	0	0	0	0	0	0	0	0	0	0
SRR2025284	NC_SA436	Chiken pizza	animal-based food	2016	Salmonella enterica	enterica	Abony	Poona	>>>>>>>>>>>>	0	0	0	0	0	0	0	0	0	0	0	0	0	0	0	0	0	0	0	0	0	0	0	0	0	0	0	0	0	0	0	0	0	0	0	0	0	0	0	0
SRR2032536	FDA00004493	pet treat bully sticks	animal-based food	2008	Salmonella enterica	enterica	Typhimurium	Typhimurium	>>>>>>>>>>>>	0	0	0	0	0	0	0	0	0	0	0	0	0	0	0	0	0	0	0	0	0	0	0	0	0	0	0	0	0	0	0	0	0	0	0	0	0	0	0	0
SRR2032537	FDA00004492	pet treat bully bite	animal-based food	2008	Salmonella enterica	enterica	Typhimurium	Typhimurium	>>>>>>>>>>>>	0	0	0	0	0	0	0	0	0	0	0	0	0	0	0	0	0	0	0	0	0	0	0	0	0	0	0	0	0	0	0	0	0	0	0	0	0	0	0	0
SRR2039125	NC_SF22	chicken meat	animal-based food	2016	Salmonella enterica	enterica	412:i:-	Oranienburg	>>>>>>>>>>>>	0	0	0	0	0	0	0	0	0	0	0	0	0	0	0	0	0	0	0	0	0	0	0	0	0	0	0	0	0	0	0	0	0	0	0	0	0	0	0	0
SRR2087273	NC_SF21	chicken meat	animal-based food	2016	Salmonella enterica	enterica	413:i:-	Newport	>>>>>>>>>>>>	0	0	0	0	0	0	0	0	0	0	0	0	0	0	0	0	0	0	0	0	0	0	0	0	0	0	0	0	0	0	0	0	0	0	0	0	0	0	0	0
SRR2087274	NC_SF23	chicken meat	animal-based food	2016	Salmonella enterica	enterica	414:i:-	Sandiego	>>>>>>>>>>>>	0	0	0	0	0	0	0	0	0	0	0	0	0	0	0	0	0	0	0	0	0	0	0	0	0	0	0	0	0	0	0	0	0	0	0	0	0	0	0	0
SRR2532713	NC_SA438	Whole Lasagna	food	2016	Salmonella enterica	enterica	Abony	Muenster	>>>>>>>>>>>>	0	0	0	0	0	0	0	0	0	0	0	0	0	0	0	0	0	0	0	0	0	0	0	0	0	0	0	0	0	0	0	0	0	0	0	0	0	0	0	0
SRR2728287	NC_SGru165	viscera	animal-based food	2016	Salmonella enterica	enterica	Grumpensis	Saintpaul	>>>>>>>>>>>>	0	0	0	0	0	0	0	0	0	0	0	0	0	0	0	0	0	0	0	0	0	0	0	0	0	0	0	0	0	0	0	0	0	0	0	0	0	0	0	0
SRR2911806	NC_SIsa424	slaughterhouse	environment	2016	Salmonella enterica	enterica	Isangi	Newport	>>>>>>>>>>>>	0	0	0	0	0	0	0	0	0	0	0	0	0	0	0	0	0	0	0	0	0	0	0	0	0	0	0	0	0	0	0	0	0	0	0	0	0	0	0	0
SRR3215422	CFSAN033939	Final product sales (animal origin)	animal-based food	2013	Salmonella enterica	enterica	Typhimurium	Typhimurium	>>>>>>>>>>>>	0	0	0	0	0	0	0	0	0	0	0	0	0	0	0	0	0	0	0	0	0	0	0	0	0	0	0	0	0	0	0	0	0	0	0	1	0	0	0	0
SRR3229336	NC_SIsa406	slaughterhouse	environment	2016	Salmonella enterica	enterica	Isangi	Tennessee	>>>>>>>>>>>>	0	0	0	0	0	0	0	0	0	0	0	0	0	0	0	0	0	0	0	0	0	0	0	0	0	0	0	0	0	0	0	0	0	0	0	0	0	0	0	0
SRR3944426	NC_SIsa425	slaughterhouse	environment	2016	Salmonella enterica	enterica	Isangi	Sandiego	>>>>>>>>>>>>	0	0	0	0	0	0	0	0	0	0	0	0	0	0	0	0	0	0	0	0	0	0	0	0	0	0	0	0	0	0	0	0	0	0	0	0	0	0	0	0
SRR4014997	RS-SF02560/13	Hot Dog	animal-based food	2013	Salmonella enterica	enterica	Choleraesuis	Westminster	>>>>>>>>>>>>	0	0	0	0	0	0	0	0	0	0	0	0	0	0	0	0	0	0	0	0	0	0	0	0	0	0	0	0	0	0	0	0	0	0	0	0	0	0	0	0
SRR4014998	FNE0094	frz rock lobster tails	animal-based food	2011	Salmonella enterica	enterica	Albany	Agona	>>>>>>>>>>>>	0	0	0	0	0	0	0	0	0	0	0	0	0	0	0	0	0	0	0	0	0	0	0	0	0	0	0	0	0	0	0	0	0	0	0	0	0	0	0	0
SRR4046383	CFSAN033907	swine	animal-based food	2006	Salmonella enterica	enterica	Typhimurium	Typhimurium	>>>>>>>>>>>>	0	0	0	0	0	0	0	0	0	0	0	0	0	0	0	0	0	0	0	0	0	0	0	0	0	0	0	0	0	0	0	0	0	0	0	0	0	0	0	0
SRR4046385	CFSAN033906	swine	animal-based food	2006	Salmonella enterica	enterica	Typhimurium	Typhimurium	>>>>>>>>>>>>	0	0	0	0	0	0	0	0	0	0	0	0	0	0	0	0	0	0	0	0	0	0	0	0	0	0	0	0	0	0	0	0	0	0	0	0	0	0	0	0
SRR4046386	CFSAN033905	swine	animal-based food	2006	Salmonella enterica	enterica	Typhimurium	Typhimurium	>>>>>>>>>>>>	0	0	0	0	0	0	0	0	0	0	0	0	0	0	0	0	0	0	0	0	0	0	0	0	0	0	0	0	0	0	0	0	0	0	0	0	0	0	0	0
SRR4046387	CFSAN033904	Cold chicken	animal-based food	2006	Salmonella enterica	enterica	Typhimurium	Typhimurium	>>>>>>>>>>>>	0	0	0	0	0	0	0	0	0	0	0	0	0	0	1	0	0	0	0	0	1	1	0	0	0	0	0	0	0	0	0	0	0	0	0	0	0	0	0	0
SRR4046388	CFSAN033909	Poultry	animal-based food	2006	Salmonella enterica	enterica	Typhimurium	Typhimurium	>>>>>>>>>>>>	0	0	0	0	0	0	0	0	0	0	0	0	0	0	0	0	0	0	0	0	0	0	0	0	0	0	0	0	0	0	0	0	0	0	0	0	0	0	0	0
SRR4046389	CFSAN033920	Poultry	animal-based food	2010	Salmonella enterica	enterica	Typhimurium	Typhimurium	>>>>>>>>>>>>	0	0	0	0	0	0	0	0	0	0	0	0	0	0	0	0	0	0	0	0	0	0	0	0	0	0	0	0	0	0	0	0	0	0	0	0	0	0	0	0
SRR4046390	CFSAN033919	In natura meat	animal-based food	2010	Salmonella enterica	enterica	Typhimurium	Typhimurium	>>>>>>>>>>>>	0	0	0	0	0	0	0	0	0	0	0	0	0	0	0	0	0	0	0	0	0	0	0	0	0	0	0	0	0	0	0	0	0	0	0	0	0	0	0	0
SRR4046393	CFSAN033918	In natura meat	animal-based food	2010	Salmonella enterica	enterica	Typhimurium	Saintpaul	>>>>>>>>>>>>	0	0	0	0	0	0	0	0	0	0	0	0	0	0	0	0	0	0	0	0	0	0	0	0	0	0	0	0	0	0	0	0	0	0	0	0	0	0	0	0
SRR4046394	CFSAN033917	Industrialized product	food	2009	Salmonella enterica	enterica	Typhimurium	Typhimurium	>>>>>>>>>>>>	0	0	0	0	0	0	0	0	0	0	0	0	0	0	0	0	0	0	0	0	0	0	0	0	0	0	0	0	0	0	0	0	0	0	0	0	0	0	0	0
SRR4046397	CFSAN033916	Industrialized product	food	2009	Salmonella enterica	enterica	Typhimurium	Typhimurium	>>>>>>>>>>>>	0	0	0	0	0	0	0	0	0	0	0	0	0	0	0	0	0	0	0	0	0	0	0	0	0	0	0	0	0	0	0	0	0	0	0	0	0	0	0	0
SRR4046398	CFSAN033915	Industrialized product	food	2009	Salmonella enterica	enterica	Typhimurium	Typhimurium	>>>>>>>>>>>>	0	0	0	0	0	0	0	0	0	0	0	0	0	0	0	0	0	0	0	0	0	0	0	0	0	0	0	0	0	0	0	0	0	0	0	0	0	0	0	0
SRR4046399	CFSAN033914	Industrialized product	food	2009	Salmonella enterica	enterica	Typhimurium	Typhimurium	>>>>>>>>>>>>	0	0	0	0	0	0	0	1	0	0	1	0	0	0	0	1	0	0	0	0	0	0	0	1	0	0	0	0	0	0	0	0	0	0	1	0	0	0	0	0
SRR4427084	FDA00004774	pet treat/pig era	animal-based food	2011	Salmonella enterica	enterica	Give	Muenster	>>>>>>>>>>>>	0	0	0	0	0	0	0	0	0	0	0	0	0	0	0	0	0	0	0	0	0	0	0	0	0	0	0	0	0	0	0	0	0	0	0	0	0	0	0	0
SRR4427825	ARIM-SE1131-06	chicken	animal-based food	2006	Salmonella enterica	enterica	Enteritidis	Enteritidis	>>>>>>>>>>>>	0	0	1	0	0	0	0	1	1	0	1	0	0	0	0	0	0	0	0	0	0	0	0	0	0	0	0	0	0	0	0	0	0	0	0	0	0	0	0	0
SRR5126097	CFSAN057740	feces	clinical-human	2006	Salmonella enterica	enterica	Enteritidis	Enteritidis	>>>>>>>>>>>>	0	0	0	0	0	0	0	0	0	0	0	0	0	0	0	0	0	0	0	0	0	0	0	0	0	0	0	0	0	0	0	0	0	0	0	0	0	0	0	0
SRR5126098	CFSAN057738	Cake	food	2005	Salmonella enterica	enterica	Enteritidis	Enteritidis	>>>>>>>>>>>>	0	0	0	0	0	0	0	0	0	0	0	0	0	0	0	0	0	0	0	0	0	0	0	0	0	0	0	0	0	0	0	0	0	0	0	0	0	0	0	0
SRR5126099	CFSAN057739	feces	clinical-human	2006	Salmonella enterica	enterica	Enteritidis	Enteritidis	>>>>>>>>>>>>	0	0	0	0	0	0	0	0	0	0	0	0	0	0	0	0	0	0	0	0	0	0	0	0	0	0	0	0	0	0	0	0	0	0	0	0	0	0	0	0
SRR5126100	CFSAN057743	feces	clinical-human	2006	Salmonella enterica	enterica	Enteritidis	Enteritidis	>>>>>>>>>>>>	0	0	0	0	0	0	0	0	0	0	0	0	0	0	0	0	0	0	0	0	0	0	0	0	0	0	0	0	0	0	0	0	0	0	0	0	0	0	0	0
SRR5126101	CFSAN057741	feces	clinical-human	2006	Salmonella enterica	enterica	Enteritidis	Enteritidis	>>>>>>>>>>>>	0	0	0	0	0	0	0	0	0	0	0	0	0	0	0	0	0	0	0	0	0	0	0	0	0	0	0	0	0	0	0	0	0	0	0	0	0	0	0	0
SRR5126102	CFSAN057742	feces	clinical-human	2006	Salmonella enterica	enterica	Enteritidis	Enteritidis	>>>>>>>>>>>>	0	0	0	0	0	0	0	0	0	0	0	0	0	0	0	0	0	0	0	0	0	0	0	0	0	0	0	0	0	0	0	0	0	0	0	0	0	0	0	0
SRR5126104	CFSAN057745	feces	clinical-human	2009	Salmonella enterica	enterica	Enteritidis	Enteritidis	>>>>>>>>>>>>	0	0	0	0	0	0	0	0	0	0	0	0	0	0	0	0	0	0	0	0	0	0	0	0	0	0	0	0	0	0	0	0	0	0	0	0	0	0	0	0
SRR5126105	CFSAN057747	feces	clinical-human	2009	Salmonella enterica	enterica	Enteritidis	Enteritidis	>>>>>>>>>>>>	0	0	0	0	0	0	0	0	0	0	0	0	0	0	0	0	0	0	0	0	0	0	0	0	0	0	0	0	0	0	0	0	0	0	0	0	0	0	0	0
SRR5126106	CFSAN057749	feces	clinical-human	2009	Salmonella enterica	enterica	Enteritidis	Enteritidis	>>>>>>>>>>>>	0	0	0	0	0	0	0	0	0	0	0	0	0	0	0	0	0	0	0	0	0	0	0	0	0	0	0	0	0	0	0	0	0	0	0	0	0	0	0	0
SRR5126107	CFSAN057746	feces	clinical-human	2009	Salmonella enterica	enterica	Enteritidis	Enteritidis	>>>>>>>>>>>>	0	0	0	0	0	0	0	0	0	0	0	0	0	0	0	0	0	0	0	0	0	0	0	0	0	0	0	0	0	0	0	0	0	0	0	0	0	0	0	0
SRR5126108	CFSAN057753	feces	clinical-human	2010	Salmonella enterica	enterica	Enteritidis	Enteritidis	>>>>>>>>>>>>	0	0	0	0	0	0	0	0	0	0	0	0	0	0	0	0	0	0	0	0	0	0	0	0	0	0	0	0	0	0	0	0	0	0	0	0	0	0	0	0
SRR5126109	CFSAN057750	Steak with Sauce	animal-based food	2010	Salmonella enterica	enterica	Enteritidis	Enteritidis	>>>>>>>>>>>>	0	0	0	0	0	0	0	0	0	0	0	0	0	0	0	0	0	0	0	0	0	0	0	0	0	0	0	0	0	0	0	0	0	0	0	0	0	0	0	0
SRR5126110	CFSAN057748	feces	clinical-human	2009	Salmonella enterica	enterica	Enteritidis	Enteritidis	>>>>>>>>>>>>	0	0	0	0	0	0	0	0	0	0	0	0	0	0	0	0	0	0	0	0	0	0	0	0	0	0	0	0	0	0	0	0	0	0	0	0	0	0	0	0
SRR5126111	CFSAN057751	feces	clinical-human	2010	Salmonella enterica	enterica	Enteritidis	Enteritidis	>>>>>>>>>>>>	0	0	0	0	0	0	0	0	0	0	0	0	0	0	0	0	0	0	0	0	0	0	0	0	0	0	0	0	0	0	0	0	0	0	0	0	0	0	0	0
SRR5126112	CFSAN057752	feces	clinical-human	2010	Salmonella enterica	enterica	Enteritidis	Enteritidis	>>>>>>>>>>>>	0	0	0	0	0	0	0	0	0	0	0	0	0	0	0	0	0	0	0	0	0	0	0	0	0	0	0	0	0	0	0	0	0	0	0	0	0	0	0	0
SRR5126113	CFSAN057755	feces	clinical-human	2010	Salmonella enterica	enterica	Enteritidis	Enteritidis	>>>>>>>>>>>>	0	0	0	0	0	0	0	0	0	0	0	0	0	0	0	0	0	0	0	0	0	0	0	0	0	0	0	0	0	0	0	0	0	0	0	0	0	0	0	0
SRR5126114	CFSAN057754	feces	clinical-human	2010	Salmonella enterica	enterica	Enteritidis	Enteritidis	>>>>>>>>>>>>	0	0	0	0	0	0	0	0	0	0	0	0	0	0	0	0	0	0	0	0	0	0	0	0	0	0	0	0	0	0	0	0	0	0	0	0	0	0	0	0
SRR5126115	CFSAN057757	Meconium	clinical-animal	2004	Salmonella enterica	enterica	Enteritidis	Enteritidis	>>>>>>>>>>>>	0	0	0	0	0	0	0	0	0	0	0	0	0	0	0	0	0	0	0	0	0	0	0	0	0	0	0	0	0	0	0	0	0	0	0	0	0	0	0	0
SRR5126116	CFSAN057756	feces	clinical-human	2012	Salmonella enterica	enterica	Enteritidis	Enteritidis	>>>>>>>>>>>>	0	0	0	0	0	0	0	0	0	0	0	0	0	0	0	0	0	0	0	0	0	0	0	0	0	0	0	0	0	0	0	0	0	0	0	0	0	0	0	0
SRR5126183	CFSAN057704	feces	clinical-human	2001	Salmonella enterica	enterica	Enteritidis	Enteritidis	>>>>>>>>>>>>	0	0	0	0	0	0	0	0	0	0	0	0	0	0	0	0	0	0	0	0	0	0	0	0	0	0	0	0	0	0	0	0	0	0	0	0	0	0	0	0
SRR5126184	CFSAN057701	Homemade Mayonnaise	animal-based food	2000	Salmonella enterica	enterica	Enteritidis	Enteritidis	>>>>>>>>>>>>	0	0	0	0	0	0	0	0	0	0	0	0	0	0	0	0	0	0	0	0	0	0	0	0	0	0	0	0	0	0	0	0	0	0	0	0	0	0	0	0
SRR5126185	CFSAN057699	feces	clinical-human	2000	Salmonella enterica	enterica	Enteritidis	Enteritidis	>>>>>>>>>>>>	0	0	0	0	0	0	0	0	0	0	0	0	0	0	0	0	0	0	0	0	0	0	0	0	0	0	0	0	0	0	0	0	0	0	0	0	0	0	0	0
SRR5126186	CFSAN057702	Eggs	animal-based food	2000	Salmonella enterica	enterica	Enteritidis	Enteritidis	>>>>>>>>>>>>	0	0	0	0	0	0	0	0	0	0	0	0	0	0	0	0	0	0	0	0	0	0	0	0	0	0	0	0	0	0	0	0	0	0	0	0	0	0	0	0
SRR5126187	CFSAN057700	feces	clinical-human	2000	Salmonella enterica	enterica	Enteritidis	Enteritidis	>>>>>>>>>>>>	0	0	0	0	0	0	0	0	0	0	0	0	0	0	0	0	0	0	0	0	0	0	0	0	0	0	0	0	0	0	0	0	0	0	0	0	0	0	0	0
SRR5126188	CFSAN057698	Vegetables Salad with Homemade Mayonnaise	animal-based food	2000	Salmonella enterica	enterica	Enteritidis	Enteritidis	>>>>>>>>>>>>	0	0	0	0	0	0	0	0	0	0	0	0	0	0	0	0	0	0	0	0	0	0	0	0	0	0	0	0	0	0	0	0	0	0	0	0	0	0	0	0
SRR5126189	CFSAN057703	feces	clinical-human	2001	Salmonella enterica	enterica	Enteritidis	Enteritidis	>>>>>>>>>>>>	0	0	0	0	0	0	0	0	0	0	0	0	0	0	0	0	0	0	0	0	0	0	0	0	0	0	0	0	0	0	0	0	0	0	0	0	0	0	0	0
SRR5126190	CFSAN057706	feces	clinical-human	2001	Salmonella enterica	enterica	Enteritidis	Enteritidis	>>>>>>>>>>>>	0	0	0	0	0	0	0	0	0	0	0	0	0	0	0	0	0	0	0	0	0	0	0	0	0	0	0	0	0	0	0	0	0	0	0	0	0	0	0	0
SRR5126191	CFSAN057705	feces	clinical-human	2001	Salmonella enterica	enterica	Enteritidis	Enteritidis	>>>>>>>>>>>>	0	0	0	0	0	0	0	0	0	0	0	0	0	0	0	0	0	0	0	0	0	0	0	0	0	0	0	0	0	0	0	0	0	0	0	0	0	0	0	0
SRR5126197	CFSAN057707	feces	clinical-human	2001	Salmonella enterica	enterica	Enteritidis	Enteritidis	>>>>>>>>>>>>	0	0	0	0	0	0	0	0	0	0	0	0	0	0	0	0	0	0	0	0	0	0	0	0	0	0	0	0	0	0	0	0	0	0	0	0	0	0	0	0
SRR5126198	CFSAN057711	Homemade Mayonnaise	animal-based food	2001	Salmonella enterica	enterica	Enteritidis	Enteritidis	>>>>>>>>>>>>	0	0	0	0	0	0	0	0	0	0	0	0	0	0	0	0	0	0	0	0	0	0	0	0	0	0	0	0	0	0	0	0	0	0	0	0	0	0	0	0
SRR5126199	CFSAN057710	Sandwich	food	2001	Salmonella enterica	enterica	Enteritidis	Enteritidis	>>>>>>>>>>>>	0	0	0	0	0	0	0	0	0	0	0	0	0	0	0	0	0	0	0	0	0	0	0	0	0	0	0	0	0	0	0	0	0	0	0	0	0	0	0	0
SRR5126200	CFSAN057715	feces	clinical-human	2002	Salmonella enterica	enterica	Enteritidis	Enteritidis	>>>>>>>>>>>>	0	0	1	0	0	0	0	1	1	0	1	0	0	0	0	0	0	0	0	0	0	0	0	0	0	0	0	0	0	0	0	0	0	0	0	0	0	0	0	0
SRR5126201	CFSAN057708	Homemade Mayonnaise	animal-based food	2001	Salmonella enterica	enterica	Enteritidis	Enteritidis	>>>>>>>>>>>>	0	0	0	0	0	0	0	0	0	0	0	0	0	0	0	0	0	0	0	0	0	0	0	0	0	0	0	0	0	0	0	0	0	0	0	0	0	0	0	0
SRR5126202	CFSAN057713	feces	clinical-human	2002	Salmonella enterica	enterica	Enteritidis	Enteritidis	>>>>>>>>>>>>	0	0	0	0	0	0	0	0	0	0	0	0	0	0	0	0	0	0	0	0	0	0	0	0	0	0	0	0	0	0	0	0	0	0	0	0	0	0	0	0
SRR5126203	CFSAN057709	Homemade Mayonnaise	animal-based food	2001	Salmonella enterica	enterica	Enteritidis	Enteritidis	>>>>>>>>>>>>	0	0	0	0	0	0	0	0	0	0	0	0	0	0	0	0	0	0	0	0	0	0	0	0	0	0	0	0	0	0	0	0	0	0	0	0	0	0	0	0
SRR5126204	CFSAN057714	feces	clinical-human	2002	Salmonella enterica	enterica	Enteritidis	Enteritidis	>>>>>>>>>>>>	0	0	0	0	0	0	0	0	0	0	0	0	0	0	0	0	0	0	0	0	0	0	0	0	0	0	0	0	0	0	0	0	0	0	0	0	0	0	0	0
SRR5126205	CFSAN057712	feces	clinical-human	2002	Salmonella enterica	enterica	Enteritidis	Enteritidis	>>>>>>>>>>>>	0	0	0	0	0	0	0	0	0	0	0	0	0	0	0	0	0	0	0	0	0	0	0	0	0	0	0	0	0	0	0	0	0	0	0	0	0	0	0	0
SRR5126206	CFSAN057718	feces	clinical-human	2002	Salmonella enterica	enterica	Enteritidis	Enteritidis	>>>>>>>>>>>>	0	0	0	0	0	0	0	0	0	0	0	0	0	0	0	0	0	0	0	0	0	0	0	0	0	0	0	0	0	0	0	0	0	0	0	0	0	0	0	0
SRR5126207	CFSAN057720	Sandwich	food	2002	Salmonella enterica	enterica	Enteritidis	Enteritidis	>>>>>>>>>>>>	0	0	0	0	0	0	0	0	0	0	0	0	0	0	0	0	0	0	0	0	0	0	0	0	0	0	0	0	0	0	0	0	0	0	0	0	0	0	0	0
SRR5126208	CFSAN057719	Cake	food	2002	Salmonella enterica	enterica	Enteritidis	Enteritidis	>>>>>>>>>>>>	0	0	0	0	0	0	0	0	0	0	0	0	0	0	0	0	0	0	0	0	0	0	0	0	0	0	0	0	0	0	0	0	0	0	0	0	0	0	0	0
SRR5126209	CFSAN057716	feces	clinical-human	2002	Salmonella enterica	enterica	Enteritidis	Enteritidis	>>>>>>>>>>>>	0	0	0	0	0	0	0	0	0	0	0	0	0	0	0	0	0	0	0	0	0	0	0	0	0	0	0	0	0	0	0	0	0	0	0	0	0	0	0	0
SRR5126210	CFSAN057717	feces	clinical-human	2002	Salmonella enterica	enterica	Enteritidis	Enteritidis	>>>>>>>>>>>>	0	0	0	0	0	0	0	0	0	0	0	0	0	0	0	0	0	0	0	0	0	0	0	0	0	0	0	0	0	0	0	0	0	0	0	0	0	0	0	0
SRR5126211	CFSAN057721	feces	clinical-human	2003	Salmonella enterica	enterica	Enteritidis	Enteritidis	>>>>>>>>>>>>	0	0	0	0	0	0	0	0	0	0	0	0	0	0	0	0	0	0	0	0	0	0	0	0	0	0	0	0	0	0	0	0	0	0	0	0	0	0	0	0
SRR5126212	CFSAN057723	Cake	food	2003	Salmonella enterica	enterica	Enteritidis	Enteritidis	>>>>>>>>>>>>	0	0	1	0	0	0	0	1	1	0	1	0	0	0	0	0	0	0	0	0	0	0	0	0	0	0	0	0	0	0	0	0	0	0	0	0	0	0	0	0
SRR5126213	CFSAN057722	feces	clinical-human	2003	Salmonella enterica	enterica	Enteritidis	Enteritidis	>>>>>>>>>>>>	0	0	0	0	0	0	0	0	0	0	0	0	0	0	0	0	0	0	0	0	0	0	0	0	0	0	0	0	0	0	0	0	0	0	0	0	0	0	0	0
SRR5126214	CFSAN057724	Pork	clinical-animal	2003	Salmonella enterica	enterica	Enteritidis	Enteritidis	>>>>>>>>>>>>	0	0	0	0	0	0	0	0	0	0	0	0	0	0	0	0	0	0	0	0	0	0	0	0	0	0	0	0	0	0	0	0	0	0	0	0	0	0	0	0
SRR5126215	CFSAN057728	feces	clinical-human	2004	Salmonella enterica	enterica	Enteritidis	Enteritidis	>>>>>>>>>>>>	0	0	0	0	0	0	0	0	0	0	0	0	0	0	0	0	0	0	0	0	0	0	0	0	0	0	0	0	0	0	0	0	0	0	0	0	0	0	0	0
SRR5126216	CFSAN057726	Pie	food	2003	Salmonella enterica	enterica	Enteritidis	Enteritidis	>>>>>>>>>>>>	0	0	0	0	0	0	0	0	0	0	0	0	0	0	0	0	0	0	0	0	0	0	0	0	0	0	0	0	0	0	0	0	0	0	0	0	0	0	0	0
SRR5126217	CFSAN057725	papaya	food	2003	Salmonella enterica	enterica	Enteritidis	Enteritidis	>>>>>>>>>>>>	0	0	0	0	0	0	0	0	0	0	0	0	0	0	0	0	0	0	0	0	0	0	0	0	0	0	0	0	0	0	0	0	0	0	0	0	1	0	0	0
SRR5126218	CFSAN057727	feces	clinical-human	2004	Salmonella enterica	enterica	Enteritidis	Enteritidis	>>>>>>>>>>>>	0	0	0	0	0	0	0	0	0	0	0	0	0	0	0	0	0	0	0	0	0	0	0	0	0	0	0	0	0	0	0	0	0	0	0	0	0	0	0	0
SRR5126219	CFSAN057730	feces	clinical-human	2004	Salmonella enterica	enterica	Enteritidis	Enteritidis	>>>>>>>>>>>>	0	0	0	0	0	0	0	0	0	0	0	0	0	0	0	0	0	0	0	0	0	0	0	0	0	0	0	0	0	0	0	0	0	0	0	0	0	0	0	0
SRR5126220	CFSAN057729	feces	clinical-human	2004	Salmonella enterica	enterica	Enteritidis	Enteritidis	>>>>>>>>>>>>	0	0	0	0	0	0	0	0	0	0	0	0	0	0	0	0	0	0	0	0	0	0	0	0	0	0	0	0	0	0	0	0	0	0	0	0	0	0	0	0
SRR5126221	CFSAN057735	feces	clinical-human	2004	Salmonella enterica	enterica	Enteritidis	Enteritidis	>>>>>>>>>>>>	0	0	0	0	0	0	0	0	0	0	0	0	0	0	0	0	0	0	0	0	0	0	0	0	0	0	0	0	0	0	0	0	0	0	0	0	0	0	0	0
SRR5126222	CFSAN057732	Strawberry Pie	food	2004	Salmonella enterica	enterica	Enteritidis	Enteritidis	>>>>>>>>>>>>	0	0	0	0	0	0	0	0	0	0	0	0	0	0	0	0	0	0	0	0	0	0	0	0	0	0	0	0	0	0	0	0	0	0	0	0	0	0	0	0
SRR5126223	CFSAN057734	feces	clinical-human	2004	Salmonella enterica	enterica	Enteritidis	Enteritidis	>>>>>>>>>>>>	0	0	0	0	0	0	0	0	0	0	0	0	0	0	0	0	0	0	0	0	0	0	0	0	0	0	0	0	0	0	0	0	0	0	0	0	0	0	0	0
SRR5126224	CFSAN057733	Raw Fish	animal-based food	2004	Salmonella enterica	enterica	Enteritidis	Enteritidis	>>>>>>>>>>>>	0	0	0	0	0	0	0	0	0	0	0	0	0	0	0	0	0	0	0	0	0	0	0	0	0	0	0	0	0	0	0	0	0	0	0	0	0	0	0	0
SRR5126225	CFSAN057731	Vegetables Salad with Homemade Mayonnaise	animal-based food	2004	Salmonella enterica	enterica	Enteritidis	Enteritidis	>>>>>>>>>>>>	0	0	0	0	0	0	0	0	0	0	0	0	0	0	0	0	0	0	0	0	0	0	0	0	0	0	0	0	0	0	0	0	0	0	0	0	0	0	0	0
SRR5126226	CFSAN057736	feces	clinical-human	2005	Salmonella enterica	enterica	Enteritidis	Enteritidis	>>>>>>>>>>>>	0	0	0	0	0	0	0	0	0	0	0	0	0	0	0	0	0	0	0	0	0	0	0	0	0	0	0	0	0	0	0	0	0	0	0	0	0	0	0	0
SRR5126227	CFSAN057737	Cake	food	2005	Salmonella enterica	enterica	Enteritidis	Enteritidis	>>>>>>>>>>>>	0	0	0	0	0	0	0	0	0	0	0	0	0	0	0	0	0	0	0	0	0	0	0	0	0	0	0	0	0	0	0	0	0	0	0	0	0	0	0	0
SRR5126459	CFSAN057658	Pie	food	1996	Salmonella enterica	enterica	Enteritidis	Enteritidis	>>>>>>>>>>>>	0	0	0	0	0	0	0	0	0	0	0	0	0	0	0	0	0	0	0	0	0	0	0	0	0	0	0	0	0	0	0	0	0	0	0	0	0	0	0	0
SRR5126929	CFSAN057659	feces	clinical-human	1996	Salmonella enterica	enterica	Enteritidis	Enteritidis	>>>>>>>>>>>>	0	0	0	0	0	0	0	0	0	0	0	0	0	0	0	0	0	0	0	0	0	0	0	0	0	0	0	0	0	0	0	0	0	0	0	0	0	0	0	0
SRR5126930	CFSAN057660	Cake	food	1996	Salmonella enterica	enterica	Enteritidis	Enteritidis	>>>>>>>>>>>>	0	0	0	0	0	0	0	0	0	0	0	0	0	0	0	0	0	0	0	0	0	0	0	0	0	0	0	0	0	0	0	0	0	0	0	0	0	0	0	0
SRR5126931	CFSAN057665	Raw Chicken Carcass	animal-based food	1996	Salmonella enterica	enterica	Enteritidis	Enteritidis	>>>>>>>>>>>>	0	0	0	0	0	0	0	0	0	0	0	0	0	0	0	0	0	0	0	0	0	0	0	0	0	0	0	0	0	0	0	0	0	0	0	0	0	0	0	0
SRR5126932	CFSAN057666	Endive	food	1996	Salmonella enterica	enterica	Enteritidis	Enteritidis	>>>>>>>>>>>>	0	0	0	0	0	0	0	0	0	0	0	0	0	0	0	0	0	0	0	0	0	0	0	0	0	0	0	0	0	0	0	0	0	0	0	0	0	0	0	0
SRR5126933	CFSAN057663	Chicken Meat	animal-based food	1996	Salmonella enterica	enterica	Enteritidis	Enteritidis	>>>>>>>>>>>>	0	0	0	0	0	0	0	0	0	0	0	0	0	0	0	0	0	0	0	0	0	0	0	0	0	0	0	0	0	0	0	0	0	0	0	0	0	0	0	0
SRR5126934	CFSAN057664	Raw Chicken Carcass	animal-based food	1996	Salmonella enterica	enterica	Enteritidis	Enteritidis	>>>>>>>>>>>>	0	0	0	0	0	0	0	0	0	0	0	0	0	0	0	0	0	0	0	0	0	0	0	0	0	0	0	0	0	0	0	0	0	0	0	0	0	0	0	0
SRR5126935	CFSAN057668	feces	clinical-human	1997	Salmonella enterica	enterica	Enteritidis	Enteritidis	>>>>>>>>>>>>	0	0	0	0	0	0	0	0	0	0	0	0	0	0	0	0	0	0	0	0	0	0	0	0	0	0	0	0	0	0	0	0	0	0	0	0	0	0	0	0
SRR5126936	CFSAN057661	feces	clinical-human	1996	Salmonella enterica	enterica	Enteritidis	Enteritidis	>>>>>>>>>>>>	0	0	0	0	0	0	0	0	0	0	0	0	0	0	0	0	0	0	0	0	0	0	0	0	0	0	0	0	0	0	0	0	0	0	0	0	0	0	0	0
SRR5126937	CFSAN057667	feces	clinical-human	1996	Salmonella enterica	enterica	Enteritidis	Enteritidis	>>>>>>>>>>>>	0	0	0	0	0	0	0	0	0	0	0	0	0	0	0	0	0	0	0	0	0	0	0	0	0	0	0	0	0	0	0	0	0	0	0	0	0	0	0	0
SRR5126938	CFSAN057662	feces	clinical-human	1996	Salmonella enterica	enterica	Enteritidis	Enteritidis	>>>>>>>>>>>>	0	0	0	0	0	0	0	0	0	0	0	0	0	0	0	0	0	0	0	0	0	0	0	0	0	0	0	0	0	0	0	0	0	0	0	0	0	0	0	0
SRR5126939	CFSAN057670	Sandwich with Homemade Mayonnaise	animal-based food	1997	Salmonella enterica	enterica	Enteritidis	Enteritidis	>>>>>>>>>>>>	0	0	0	0	0	0	0	0	0	0	0	0	0	0	0	0	0	0	0	0	0	0	0	0	0	0	0	0	0	0	0	0	0	0	0	0	0	0	0	0
SRR5126940	CFSAN057669	Cake	food	1997	Salmonella enterica	enterica	Enteritidis	Enteritidis	>>>>>>>>>>>>	0	0	0	0	0	0	0	0	0	0	0	0	0	0	0	0	0	0	0	0	0	0	0	0	0	0	0	0	0	0	0	0	0	0	0	0	0	0	0	0
SRR5126941	CFSAN057671	Homemade Mayonnaise	animal-based food	1997	Salmonella enterica	enterica	Enteritidis	Enteritidis	>>>>>>>>>>>>	0	0	0	0	0	0	0	0	0	0	0	0	0	0	0	0	0	0	0	0	0	0	0	0	0	0	0	0	0	0	0	0	0	0	0	0	0	0	0	0
SRR5126942	CFSAN057674	feces	clinical-human	1998	Salmonella enterica	enterica	Enteritidis	Enteritidis	>>>>>>>>>>>>	0	0	0	0	0	0	0	0	0	0	0	0	0	0	0	0	0	0	0	0	0	0	0	0	0	0	0	0	0	0	0	0	0	0	0	0	0	0	0	0
SRR5126943	CFSAN057673	Homemade Mayonnaise	animal-based food	1997	Salmonella enterica	enterica	Enteritidis	Enteritidis	>>>>>>>>>>>>	0	0	0	0	0	0	0	0	0	0	0	0	0	0	0	0	0	0	0	0	0	0	0	0	0	0	0	0	0	0	0	0	0	0	0	0	0	0	0	0
SRR5126944	CFSAN057672	Cake	food	1997	Salmonella enterica	enterica	Enteritidis	Enteritidis	>>>>>>>>>>>>	0	0	0	0	0	0	0	0	0	0	0	0	0	0	0	0	0	0	0	0	0	0	0	0	0	0	0	0	0	0	0	0	0	0	0	0	0	0	0	0
SRR5126945	CFSAN057675	feces	clinical-human	1998	Salmonella enterica	enterica	Enteritidis	Enteritidis	>>>>>>>>>>>>	0	0	0	0	0	0	0	0	0	0	0	0	0	0	0	0	0	0	0	0	0	0	0	0	0	0	0	0	0	0	0	0	0	0	0	0	0	0	0	0
SRR5126946	CFSAN057676	feces	clinical-human	1998	Salmonella enterica	enterica	Enteritidis	Enteritidis	>>>>>>>>>>>>	0	0	0	0	0	0	0	0	0	0	0	0	0	0	0	0	0	0	0	0	0	0	0	0	0	0	0	0	0	0	0	0	0	0	0	0	0	0	0	0
SRR5126947	CFSAN057678	Homemade Mayonnaise	animal-based food	1998	Salmonella enterica	enterica	Enteritidis	Enteritidis	>>>>>>>>>>>>	0	0	0	0	0	0	0	0	0	0	0	0	0	0	0	0	0	0	0	0	0	0	0	0	0	0	0	0	0	0	0	0	0	0	0	0	0	0	0	0
SRR5126948	CFSAN057677	feces	clinical-human	1998	Salmonella enterica	enterica	Enteritidis	Enteritidis	>>>>>>>>>>>>	0	0	0	0	0	0	0	0	0	0	0	0	0	0	0	0	0	0	0	0	0	0	0	0	0	0	0	0	0	0	0	0	0	0	0	0	0	0	0	0
SRR5126949	CFSAN057681	feces	clinical-human	1999	Salmonella enterica	enterica	Enteritidis	Enteritidis	>>>>>>>>>>>>	0	0	0	0	0	0	0	0	0	0	0	0	0	0	0	0	0	0	0	0	0	0	0	0	0	0	0	0	0	0	0	0	0	0	0	0	0	0	0	0
SRR5126950	CFSAN057680	Cake	food	1998	Salmonella enterica	enterica	Enteritidis	Enteritidis	>>>>>>>>>>>>	0	0	0	0	0	0	0	0	0	0	0	0	0	0	0	0	0	0	0	0	0	0	0	0	0	0	0	0	0	0	0	0	0	0	0	0	0	0	0	0
SRR5126951	CFSAN057679	Chocolate Mousse	food	1998	Salmonella enterica	enterica	Enteritidis	Enteritidis	>>>>>>>>>>>>	0	0	0	0	0	0	0	0	0	0	0	0	0	0	0	0	0	0	0	0	0	0	0	0	0	0	0	0	0	0	0	0	0	0	0	0	0	0	0	0
SRR5126952	CFSAN057685	Cake	food	1999	Salmonella enterica	enterica	Enteritidis	Enteritidis	>>>>>>>>>>>>	0	0	0	0	0	0	0	0	0	0	0	0	0	0	0	0	0	0	0	0	0	0	0	0	0	0	0	0	0	0	0	0	0	0	0	0	0	0	0	0
SRR5126953	CFSAN057684	feces	clinical-human	1999	Salmonella enterica	enterica	Enteritidis	Enteritidis	>>>>>>>>>>>>	0	0	0	0	0	0	0	0	0	0	0	0	0	0	0	0	0	0	0	0	0	0	0	0	0	0	0	0	0	0	0	0	0	0	0	0	0	0	0	0
SRR5126954	CFSAN057682	feces	clinical-human	1999	Salmonella enterica	enterica	Enteritidis	Enteritidis	>>>>>>>>>>>>	0	0	0	0	0	0	0	0	0	0	0	0	0	0	0	0	0	0	0	0	0	0	0	0	0	0	0	0	0	0	0	0	0	0	0	0	0	0	0	0
SRR5126955	CFSAN057686	Homemade Mayonnaise	animal-based food	1999	Salmonella enterica	enterica	Enteritidis	Enteritidis	>>>>>>>>>>>>	0	0	0	0	0	0	0	0	0	0	0	0	0	0	0	0	0	0	0	0	0	0	0	0	0	0	0	0	0	0	0	0	0	0	0	0	0	0	0	0
SRR5126956	CFSAN057683	feces	clinical-human	1999	Salmonella enterica	enterica	Enteritidis	Enteritidis	>>>>>>>>>>>>	0	0	0	0	0	0	0	0	0	0	0	0	0	0	0	0	0	0	0	0	0	0	0	0	0	0	0	0	0	0	0	0	0	0	0	0	0	0	0	0
SRR5126957	CFSAN057687	Sandwich	food	1999	Salmonella enterica	enterica	Enteritidis	Enteritidis	>>>>>>>>>>>>	0	0	0	0	0	0	0	0	0	0	0	0	0	0	0	0	0	0	0	0	0	0	0	0	0	0	0	0	0	0	0	0	0	0	0	0	0	0	0	0
SRR5126958	CFSAN057693	Cake	food	1999	Salmonella enterica	enterica	Enteritidis	Enteritidis	>>>>>>>>>>>>	0	0	0	0	0	0	0	0	0	0	0	0	0	0	0	0	0	0	0	0	0	0	0	0	0	0	0	0	0	0	0	0	0	0	0	0	0	0	0	0
SRR5126959	CFSAN057691	Sausage with Tomato Sauce	animal-based food	1999	Salmonella enterica	enterica	Enteritidis	Enteritidis	>>>>>>>>>>>>	0	0	0	0	0	0	0	0	0	0	0	0	0	0	0	0	0	0	0	0	0	0	0	0	0	0	0	0	0	0	0	0	0	0	0	0	0	0	0	0
SRR5126960	CFSAN057692	Soup	food	1999	Salmonella enterica	enterica	Enteritidis	Enteritidis	>>>>>>>>>>>>	0	0	0	0	0	0	0	0	0	0	0	0	0	0	0	0	0	0	0	0	0	0	0	0	0	0	0	0	0	0	0	0	0	0	0	0	0	0	0	0
SRR5126961	CFSAN057689	Cake	food	1999	Salmonella enterica	enterica	Enteritidis	Enteritidis	>>>>>>>>>>>>	0	0	0	0	0	0	0	0	0	0	0	0	0	0	0	0	0	0	0	0	0	0	0	0	0	0	0	0	0	0	0	0	0	0	0	0	0	0	0	0
SRR5126962	CFSAN057696	feces	clinical-human	2000	Salmonella enterica	enterica	Enteritidis	Enteritidis	>>>>>>>>>>>>	0	0	0	0	0	0	0	0	0	0	0	0	0	0	0	0	0	0	0	0	0	0	0	0	0	0	0	0	0	0	0	0	0	0	0	0	0	0	0	0
SRR5126963	CFSAN057694	Cake	food	1999	Salmonella enterica	enterica	Enteritidis	Enteritidis	>>>>>>>>>>>>	0	0	0	0	0	0	0	0	0	0	0	0	0	0	0	0	0	0	0	0	0	0	0	0	0	0	0	0	0	0	0	0	0	0	0	0	0	0	0	0
SRR5126964	CFSAN057688	Cake	food	1999	Salmonella enterica	enterica	Enteritidis	Enteritidis	>>>>>>>>>>>>	0	0	0	0	0	0	0	0	0	0	0	0	0	0	0	0	0	0	0	0	0	0	0	0	0	0	0	0	0	0	0	0	0	0	0	0	0	0	0	0
SRR5126965	CFSAN057695	Raw Chicken	animal-based food	1999	Salmonella enterica	enterica	Enteritidis	Enteritidis	>>>>>>>>>>>>	0	0	0	0	0	0	0	0	0	0	0	0	0	0	0	0	0	0	0	0	0	0	0	0	0	0	0	0	0	0	0	0	0	0	0	0	0	0	0	0
SRR5126966	CFSAN057690	Roasted Chicken	animal-based food	1999	Salmonella enterica	enterica	Enteritidis	Enteritidis	>>>>>>>>>>>>	0	0	0	0	0	0	0	0	0	0	0	0	0	0	0	0	0	0	0	0	0	0	0	0	0	0	0	0	0	0	0	0	0	0	0	0	0	0	0	0
SRR5126967	CFSAN057697	feces	clinical-human	2000	Salmonella enterica	enterica	Enteritidis	Enteritidis	>>>>>>>>>>>>	0	0	0	0	0	0	0	0	0	0	0	0	0	0	0	0	0	0	0	0	0	0	0	0	0	0	0	0	0	0	0	0	0	0	0	0	0	0	0	0
SRR5126968	CFSAN057625	feces	clinical-human	1986	Salmonella enterica	enterica	Enteritidis	Enteritidis	>>>>>>>>>>>>	0	0	0	0	0	0	0	0	0	0	0	0	0	0	0	0	0	0	0	0	0	0	0	0	0	0	0	0	0	0	0	0	0	0	0	0	0	0	0	0
SRR5126969	CFSAN057630	feces	clinical-human	1994	Salmonella enterica	enterica	Enteritidis	Enteritidis	>>>>>>>>>>>>	0	0	0	0	0	0	0	0	0	0	0	0	0	0	0	0	0	0	0	0	0	0	0	0	0	0	0	0	0	0	0	0	0	0	0	0	0	0	0	0
SRR5126970	CFSAN057631	feces	clinical-human	1994	Salmonella enterica	enterica	Enteritidis	Enteritidis	>>>>>>>>>>>>	0	0	0	0	0	0	0	0	0	0	0	0	0	0	0	0	0	0	0	0	0	0	0	0	0	0	0	0	0	0	0	0	0	0	0	0	0	0	0	0
SRR5126971	CFSAN057627	feces	clinical-human	1994	Salmonella enterica	enterica	Enteritidis	Enteritidis	>>>>>>>>>>>>	0	0	0	0	0	0	0	0	0	0	0	0	0	0	0	0	0	0	0	0	0	0	0	0	0	0	0	0	0	0	0	0	0	0	0	0	0	0	0	0
SRR5126972	CFSAN057628	feces	clinical-human	1994	Salmonella enterica	enterica	Enteritidis	Enteritidis	>>>>>>>>>>>>	0	0	0	0	0	0	0	0	0	0	0	0	0	0	0	0	0	0	0	0	0	0	0	0	0	0	0	0	0	0	0	0	0	0	0	0	1	0	0	0
SRR5126973	CFSAN057629	feces	clinical-human	1994	Salmonella enterica	enterica	Enteritidis	Enteritidis	>>>>>>>>>>>>	0	0	0	0	0	0	0	0	0	0	0	0	0	0	0	0	0	0	0	0	0	0	0	0	0	0	0	0	0	0	0	0	0	0	0	0	0	0	0	0
SRR5126974	CFSAN057626	feces	clinical-human	1992	Salmonella enterica	enterica	Enteritidis	Enteritidis	>>>>>>>>>>>>	0	0	0	0	0	0	0	0	0	0	0	0	0	0	0	0	0	0	0	0	0	0	0	0	0	0	0	0	0	0	0	0	0	0	0	0	0	0	0	0
SRR5126975	CFSAN057632	feces	clinical-human	1994	Salmonella enterica	enterica	Enteritidis	Enteritidis	>>>>>>>>>>>>	0	0	0	0	0	0	0	0	0	0	0	0	0	0	0	0	0	0	0	0	0	0	0	0	0	0	0	0	0	0	0	0	0	0	0	0	0	0	0	0
SRR5126976	CFSAN057635	feces	clinical-human	1995	Salmonella enterica	enterica	Enteritidis	Enteritidis	>>>>>>>>>>>>	0	0	0	0	0	0	0	0	0	0	0	0	0	0	0	0	0	0	0	0	0	0	0	0	0	0	0	0	0	0	0	0	0	0	0	0	0	0	0	0
SRR5126977	CFSAN057636	feces	clinical-human	1995	Salmonella enterica	enterica	Enteritidis	Enteritidis	>>>>>>>>>>>>	0	0	0	0	0	0	0	0	0	0	0	0	0	0	0	0	0	0	0	0	0	0	0	0	0	0	0	0	0	0	0	0	0	0	0	0	0	0	0	0
SRR5126978	CFSAN057637	Stewed Chicken	animal-based food	1995	Salmonella enterica	enterica	Enteritidis	Enteritidis	>>>>>>>>>>>>	0	0	0	0	0	0	0	0	0	0	0	0	0	0	0	0	0	0	0	0	0	0	0	0	0	0	0	0	0	0	0	0	0	0	0	0	0	0	0	0
SRR5126979	CFSAN057633	Salad with Mayonnaise	animal-based food	1994	Salmonella enterica	enterica	Enteritidis	Enteritidis	>>>>>>>>>>>>	0	0	0	0	0	0	0	0	0	0	0	0	0	0	0	0	0	0	0	0	0	0	0	0	0	0	0	0	0	0	0	0	0	0	0	0	0	0	0	0
SRR5126980	CFSAN057634	Raw Chicken Sausage	animal-based food	1994	Salmonella enterica	enterica	Enteritidis	Enteritidis	>>>>>>>>>>>>	0	0	0	0	0	0	0	0	0	0	0	0	0	0	0	0	0	0	0	0	0	0	0	0	0	0	0	0	0	0	0	0	0	0	0	0	0	0	0	0
SRR5126981	CFSAN057638	Vegetable Salad with Mayonnaise	animal-based food	1995	Salmonella enterica	enterica	Enteritidis	Enteritidis	>>>>>>>>>>>>	0	0	0	0	0	0	0	0	0	0	0	0	0	0	0	0	0	0	0	0	0	0	0	0	0	0	0	0	0	0	0	0	0	0	0	0	0	0	0	0
SRR5126982	CFSAN057639	feces	clinical-human	1995	Salmonella enterica	enterica	Enteritidis	Enteritidis	>>>>>>>>>>>>	0	0	0	0	0	0	0	0	0	0	0	0	0	0	0	0	0	0	0	0	0	0	0	0	0	0	0	0	0	0	0	0	0	0	0	0	0	0	0	0
SRR5126983	CFSAN057640	feces	clinical-human	1995	Salmonella enterica	enterica	Enteritidis	Enteritidis	>>>>>>>>>>>>	0	0	0	0	0	0	0	0	0	0	0	0	0	0	0	0	0	0	0	0	0	0	0	0	0	0	0	0	0	0	0	0	0	0	0	0	0	0	0	0
SRR5126984	CFSAN057641	Raw Sausage	animal-based food	1995	Salmonella enterica	enterica	Enteritidis	Enteritidis	>>>>>>>>>>>>	0	0	0	0	0	0	0	0	0	0	0	0	0	0	0	0	0	0	0	0	0	0	0	0	0	0	0	0	0	0	0	0	0	0	0	0	0	0	0	0
SRR5126985	CFSAN057643	Frozen Chicken	animal-based food	1995	Salmonella enterica	enterica	Enteritidis	Enteritidis	>>>>>>>>>>>>	0	0	0	0	0	0	0	0	0	0	0	0	0	0	0	0	0	0	0	0	0	0	0	0	0	0	0	0	0	0	0	0	0	0	0	0	0	0	0	0
SRR5126986	CFSAN057644	Sandwich	food	1995	Salmonella enterica	enterica	Enteritidis	Enteritidis	>>>>>>>>>>>>	0	0	0	0	0	0	0	0	0	0	0	0	0	0	0	0	0	0	0	0	0	0	0	0	0	0	0	0	0	0	0	0	0	0	0	0	0	0	0	0
SRR5126987	CFSAN057642	Mayonnaise	animal-based food	1995	Salmonella enterica	enterica	Enteritidis	Enteritidis	>>>>>>>>>>>>	0	0	0	0	0	0	0	0	0	0	0	0	0	0	0	0	0	0	0	0	0	0	0	0	0	0	0	0	0	0	0	0	0	0	0	0	0	0	0	0
SRR5126988	CFSAN057645	corn	food	1995	Salmonella enterica	enterica	Enteritidis	Enteritidis	>>>>>>>>>>>>	0	0	0	0	0	0	0	0	0	0	0	0	0	0	0	0	0	0	0	0	0	0	0	0	0	0	0	0	0	0	0	0	0	0	0	0	0	0	0	0
SRR5126989	CFSAN057646	Potato Sticks	food	1995	Salmonella enterica	enterica	Enteritidis	Enteritidis	>>>>>>>>>>>>	0	0	0	0	0	0	0	0	0	0	0	0	0	0	0	0	0	0	0	0	0	0	0	0	0	0	0	0	0	0	0	0	0	0	0	0	0	0	0	0
SRR5126990	CFSAN057647	Salad with Mayonnaise	animal-based food	1995	Salmonella enterica	enterica	Enteritidis	Enteritidis	>>>>>>>>>>>>	0	0	0	0	0	0	0	0	0	0	0	0	0	0	0	0	0	0	0	0	0	0	0	0	0	0	0	0	0	0	0	0	0	0	0	0	0	0	0	0
SRR5126991	CFSAN057649	Vegetable Salad with Mayonnaise	animal-based food	1995	Salmonella enterica	enterica	Enteritidis	Enteritidis	>>>>>>>>>>>>	0	0	0	0	0	0	0	0	0	0	0	0	0	0	0	0	0	0	0	0	0	0	0	0	0	0	0	0	0	0	0	0	0	0	0	0	0	0	0	0
SRR5126992	CFSAN057651	Coocked Quail Eggs	animal-based food	1995	Salmonella enterica	enterica	Enteritidis	Enteritidis	>>>>>>>>>>>>	0	0	0	0	0	0	0	0	0	0	0	0	0	0	0	0	0	0	0	0	0	0	0	0	0	0	0	0	0	0	0	0	0	0	0	0	0	0	0	0
SRR5126993	CFSAN057648	Frozen Chicken Carcass	animal-based food	1995	Salmonella enterica	enterica	Enteritidis	Enteritidis	>>>>>>>>>>>>	0	0	0	0	0	0	0	0	0	0	0	0	0	0	0	0	0	0	0	0	0	0	0	0	0	0	0	0	0	0	0	0	0	0	0	0	0	0	0	0
SRR5126994	CFSAN057650	Pasta Salad with Mayonnaise	animal-based food	1995	Salmonella enterica	enterica	Enteritidis	Enteritidis	>>>>>>>>>>>>	0	0	0	0	0	0	0	0	0	0	0	0	0	0	0	0	0	0	0	0	0	0	0	0	0	0	0	0	0	0	0	0	0	0	0	0	0	0	0	0
SRR5126995	CFSAN057652	feces	clinical-human	1996	Salmonella enterica	enterica	Enteritidis	Enteritidis	>>>>>>>>>>>>	0	0	0	0	0	0	0	0	0	0	0	0	0	1	0	0	0	0	0	0	0	0	1	0	0	0	0	0	0	0	0	0	0	0	0	0	0	0	0	0
SRR5126996	CFSAN057653	feces	clinical-human	1996	Salmonella enterica	enterica	Enteritidis	Enteritidis	>>>>>>>>>>>>	0	0	0	0	0	0	0	0	0	0	0	0	0	0	0	0	0	0	0	0	0	0	0	0	0	0	0	0	0	0	0	0	0	0	0	0	0	0	0	0
SRR5126997	CFSAN057654	feces	clinical-human	1996	Salmonella enterica	enterica	Enteritidis	Enteritidis	>>>>>>>>>>>>	0	0	0	0	0	0	0	0	0	0	0	0	0	0	0	0	0	0	0	0	0	0	0	0	0	0	0	0	0	0	0	0	0	0	0	0	0	0	0	0
SRR5126998	CFSAN057655	feces	clinical-human	1996	Salmonella enterica	enterica	Enteritidis	Enteritidis	>>>>>>>>>>>>	0	0	0	0	0	0	0	0	0	0	0	0	0	0	0	0	0	0	0	0	0	0	0	0	0	0	0	0	0	0	0	0	0	0	0	0	0	0	0	0
SRR5126999	CFSAN057656	Raw Pork Loin	animal-based food	1996	Salmonella enterica	enterica	Enteritidis	Enteritidis	>>>>>>>>>>>>	0	0	0	0	0	0	0	0	0	0	0	0	0	0	0	0	0	0	0	0	0	0	0	0	0	0	0	0	0	0	0	0	0	0	0	0	0	0	0	0
SRR5127000	CFSAN057657	feces	clinical-human	1996	Salmonella enterica	enterica	Enteritidis	Enteritidis	>>>>>>>>>>>>	0	0	0	0	0	0	0	0	0	0	0	0	0	0	0	0	0	0	0	0	0	0	0	0	0	0	0	0	0	0	0	0	0	0	0	0	0	0	0	0
SRR5155620	ADRDL-777	Blood Meal	animal-based food	2008	Salmonella enterica	enterica	Infantis	Infantis	>>>>>>>>>>>>	0	0	0	0	0	0	0	0	0	0	0	0	0	0	0	0	0	0	0	0	0	0	0	0	0	0	0	0	0	0	0	0	0	0	0	0	0	0	0	0
SRR5155621	FDA00004786	pet treat/pig era strips	animal-based food	2011	Salmonella enterica	enterica	Give	Adelaide	>>>>>>>>>>>>	0	0	0	0	0	0	0	0	0	0	0	0	0	0	0	0	0	0	0	0	0	0	0	0	0	0	0	0	0	0	0	0	0	0	0	0	0	0	0	0
SRR5155623	FDA00000652	shrimp	animal-based food	2004	Salmonella enterica	enterica	Poona	Anatum	>>>>>>>>>>>>	0	0	0	0	0	0	0	0	0	0	0	0	0	0	0	0	0	0	0	0	0	0	0	0	0	0	0	0	0	0	0	0	0	0	0	0	0	0	0	0
SRR5155654	FDA00001261	frz lobster tails	animal-based food	2008	Salmonella enterica	enterica	Sandiego	Anatum	>>>>>>>>>>>>	0	0	0	0	0	0	0	0	0	0	0	0	0	0	0	0	0	0	0	0	0	0	0	0	0	0	0	0	0	0	0	0	0	0	0	0	0	0	0	0
SRR5155664	ADRDL-770	Poultry Organs	clinical-animal	2011	Salmonella enterica	enterica	Gallinarum	Senftenberg	>>>>>>>>>>>>	0	0	0	0	0	0	0	0	0	0	0	0	0	0	1	0	0	0	0	0	0	1	0	0	0	0	0	0	0	0	0	0	0	0	0	0	0	0	0	0
SRR5155671	ADRDL-796	Meat and bones Meal	animal-based food	2006	Salmonella enterica	enterica	Schwarzengrund	I 1,4,[5],12:d:-	>>>>>>>>>>>>	0	0	0	0	0	0	0	0	0	0	0	0	0	0	0	0	0	0	0	0	0	0	0	0	0	1	0	0	0	0	0	0	0	0	0	0	0	0	0	0
SRR5155672	ADRDL-782	Disposable shoes covers	environment	2011	Salmonella enterica	enterica	Senftenberg	Senftenberg	>>>>>>>>>>>>	0	0	0	0	0	0	0	0	0	0	0	0	0	0	1	0	0	0	0	0	0	1	0	0	0	0	0	0	0	0	0	0	0	0	0	0	0	0	0	0
SRR5159822	CFSAN057876	Carcasse	animal-based food	2015	Salmonella enterica	enterica	Enteritidis	Livingstone	>>>>>>>>>>>>	0	0	0	1	0	0	0	0	0	0	0	0	1	0	0	0	0	0	0	0	0	0	0	0	0	0	0	0	0	0	1	0	0	0	0	0	0	0	0	0
SRR5159825	CFSAN057875	Fecal Swab	clinical-human	2014	Salmonella enterica	enterica	Enteritidis	Enteritidis	>>>>>>>>>>>>	0	0	0	0	0	0	0	0	0	0	0	0	0	0	0	0	0	0	0	0	0	0	0	0	0	0	0	0	0	0	0	0	0	0	0	0	0	0	0	0
SRR5159845	CFSAN057886	food	food	2016	Salmonella enterica	enterica	Enteritidis	Panama	>>>>>>>>>>>>	0	0	0	0	0	0	0	0	0	0	0	0	0	0	0	0	0	0	0	0	0	0	0	0	0	0	0	0	0	0	0	0	0	0	0	0	0	0	0	0
SRR5159854	CFSAN057881	egg	animal-based food	2016	Salmonella enterica	enterica	Enteritidis	Enteritidis	>>>>>>>>>>>>	0	0	0	0	0	0	0	0	0	0	0	0	0	0	0	0	0	0	0	0	0	0	0	0	0	0	0	0	0	0	0	0	0	0	0	0	0	0	0	0
SRR5159876	CFSAN057878	Carcasse	animal-based food	2016	Salmonella enterica	enterica	Enteritidis	Ouakam	>>>>>>>>>>>>	0	0	0	0	0	0	0	0	0	0	0	0	0	0	0	0	0	0	0	0	0	0	0	0	0	0	0	0	0	0	0	0	0	0	0	0	0	0	0	0
SRR5159882	CFSAN057877	Carcasse	animal-based food	2015	Salmonella enterica	enterica	Enteritidis	Javiana	>>>>>>>>>>>>	0	0	0	0	0	0	0	0	0	0	0	0	0	0	0	0	0	0	0	0	0	0	0	0	0	0	0	0	0	0	0	0	0	0	0	0	0	0	0	0
SRR5159883	CFSAN057869	blood	clinical-human	2014	Salmonella enterica	enterica	Enteritidis	Enteritidis	>>>>>>>>>>>>	0	0	0	0	0	0	0	0	0	0	0	0	0	0	0	0	0	0	0	0	0	0	0	0	0	0	0	0	0	0	0	0	0	0	0	0	0	0	0	0
SRR5159885	CFSAN057871	food	food	2014	Salmonella enterica	enterica	Enteritidis	Mbandaka	>>>>>>>>>>>>	0	0	0	0	0	0	0	0	0	0	0	0	0	0	0	0	0	0	0	0	0	0	0	0	0	0	0	0	0	0	0	0	0	0	0	0	0	0	0	0
SRR5160120	CFSAN057887	food	food	2016	Salmonella enterica	enterica	Enteritidis	Newport	>>>>>>>>>>>>	0	0	0	0	0	0	0	0	0	0	0	0	0	0	0	0	0	0	0	0	0	0	0	0	0	0	0	0	0	0	0	0	0	0	0	0	0	0	0	0
SRR5160144	CFSAN057870	feces	clinical-human	2014	Salmonella enterica	enterica	Enteritidis	Enteritidis	>>>>>>>>>>>>	0	0	0	0	0	0	0	0	0	0	0	0	0	0	0	0	0	0	0	0	0	0	0	0	0	0	0	0	0	0	0	0	0	0	0	0	0	0	0	0
SRR5160149	CFSAN057890	food	food	2016	Salmonella enterica	enterica	Enteritidis	Enteritidis	>>>>>>>>>>>>	0	0	0	0	0	0	0	0	0	0	0	0	0	0	0	0	0	0	0	0	0	0	0	0	0	0	0	0	0	0	0	0	0	0	0	0	0	0	0	0
SRR5160151	CFSAN057879	Chicken Carcasse	animal-based food	2016	Salmonella enterica	enterica	Enteritidis	Schwarzengrund	>>>>>>>>>>>>	0	0	0	0	0	0	0	0	0	0	0	0	0	0	0	0	0	0	0	0	0	0	0	0	0	0	0	0	0	0	0	1	0	0	0	0	0	0	0	0
SRR5160152	CFSAN057872	Coproculture	clinical-human	2014	Salmonella enterica	enterica	Enteritidis	Enteritidis	>>>>>>>>>>>>	0	0	0	0	0	0	0	0	0	0	0	0	0	0	0	0	0	0	0	0	0	0	0	0	0	0	0	0	0	0	0	0	0	0	0	0	0	0	0	0
SRR5160221	CFSAN057873	Chicken Carcasse	animal-based food	2014	Salmonella enterica	enterica	Enteritidis	Enteritidis	>>>>>>>>>>>>	0	0	0	0	0	0	0	0	0	0	0	0	0	0	0	0	0	0	0	0	0	0	0	0	0	0	0	0	0	0	0	0	0	0	0	0	0	0	0	0
SRR5160233	CFSAN057882	egg	animal-based food	2016	Salmonella enterica	enterica	Enteritidis	Enteritidis	>>>>>>>>>>>>	0	0	0	0	0	0	0	0	0	0	0	0	0	0	0	0	0	0	0	0	0	0	0	0	0	0	0	0	0	0	0	0	0	0	0	0	0	0	0	0
SRR5160235	CFSAN057884	missing	clinical-human	2016	Salmonella enterica	enterica	Enteritidis	Enteritidis	>>>>>>>>>>>>	0	0	0	0	0	0	0	0	0	0	0	0	0	0	0	0	0	0	0	0	0	0	0	0	0	0	0	0	0	0	0	0	0	0	0	0	0	0	0	0
SRR5160237	CFSAN057885	food	food	2016	Salmonella enterica	enterica	Enteritidis	Enteritidis	>>>>>>>>>>>>	0	0	0	0	0	0	0	0	0	0	0	0	0	0	0	0	0	0	0	0	0	0	0	0	0	0	0	0	0	0	0	0	0	0	0	0	0	0	0	0
SRR5160242	CFSAN057868	Fecal Swab	clinical-human	2014	Salmonella enterica	enterica	Enteritidis	Enteritidis	>>>>>>>>>>>>	0	0	0	0	0	0	0	0	0	0	0	0	0	0	0	0	0	0	0	0	0	0	0	0	0	0	0	0	0	0	0	0	0	0	0	0	0	0	0	0
SRR5160269	CFSAN057883	egg	animal-based food	2016	Salmonella enterica	enterica	Enteritidis	Enteritidis	>>>>>>>>>>>>	0	0	0	0	0	0	0	0	0	0	0	0	0	0	0	0	0	0	0	0	0	0	0	0	0	0	0	0	0	0	0	0	0	0	0	0	0	0	0	0
SRR5160270	CFSAN057852	Fecal Swab	clinical-human	2014	Salmonella enterica	enterica	Enteritidis	Enteritidis	>>>>>>>>>>>>	0	0	0	0	0	0	0	0	0	0	0	0	0	0	0	0	0	0	0	0	0	0	0	0	0	0	0	0	0	0	0	0	0	0	0	0	0	0	0	0
SRR5160271	CFSAN057844	Ration	food	2013	Salmonella enterica	enterica	Enteritidis	Enteritidis	>>>>>>>>>>>>	0	0	0	0	0	0	0	0	0	0	0	0	0	0	0	0	0	0	0	0	0	0	0	0	0	0	0	0	0	0	0	0	0	0	0	0	0	0	0	0
SRR5160272	CFSAN057891	food	food	2016	Salmonella enterica	enterica	Enteritidis	Enteritidis	>>>>>>>>>>>>	0	0	0	0	0	0	0	0	0	0	0	0	0	0	0	0	0	0	0	0	0	0	0	0	0	0	0	0	0	0	0	0	0	0	0	0	0	0	0	0
SRR5160274	CFSAN057867	blood	clinical-human	2014	Salmonella enterica	enterica	Enteritidis	Enteritidis	>>>>>>>>>>>>	0	0	0	0	0	0	0	0	0	0	0	0	0	0	0	0	0	0	0	0	0	0	0	0	0	0	0	0	0	0	0	0	0	0	0	0	0	0	0	0
SRR5160276	CFSAN057889	food	food	2016	Salmonella enterica	enterica	Enteritidis	Enteritidis	>>>>>>>>>>>>	0	0	0	0	0	0	0	0	0	0	0	0	0	0	0	0	0	0	0	0	0	0	0	0	0	0	0	0	0	0	0	0	0	0	0	0	0	0	0	0
SRR5160277	CFSAN057880	egg	animal-based food	2016	Salmonella enterica	enterica	Enteritidis	Enteritidis	>>>>>>>>>>>>	0	0	0	0	0	0	0	0	0	0	0	0	0	0	0	0	0	0	0	0	0	0	0	0	0	0	0	0	0	0	0	0	0	0	0	0	0	0	0	0
SRR5160280	CFSAN057874	Fecal Swab	clinical-human	2014	Salmonella enterica	enterica	Enteritidis	Enteritidis	>>>>>>>>>>>>	0	0	0	0	0	0	0	0	0	0	0	0	0	0	0	0	0	0	0	0	0	0	0	0	0	0	0	0	0	0	0	0	0	0	0	0	0	0	0	0
SRR5160281	CFSAN057888	food	food	2016	Salmonella enterica	enterica	Enteritidis	Enteritidis	>>>>>>>>>>>>	0	0	0	0	0	0	0	0	0	0	0	0	0	0	0	0	0	0	0	0	0	0	0	0	0	0	0	0	0	0	0	0	0	0	0	0	0	0	0	0
SRR5160284	CFSAN057855	urine	clinical-human	2014	Salmonella enterica	enterica	Enteritidis	Enteritidis	>>>>>>>>>>>>	0	0	0	0	0	0	0	0	0	0	0	0	0	0	0	0	0	0	0	0	0	0	0	0	0	0	0	0	0	0	0	0	0	0	0	0	0	0	0	0
SRR5160289	CFSAN057850	feces	clinical-human	2014	Salmonella enterica	enterica	Enteritidis	Enteritidis	>>>>>>>>>>>>	0	0	0	0	0	0	0	0	0	0	0	0	0	0	0	0	0	0	0	0	0	0	0	0	0	0	0	0	0	0	0	0	0	0	0	0	0	0	0	0
SRR5160290	CFSAN057842	chicken	animal-based food	1993	Salmonella enterica	enterica	Enteritidis	Enteritidis	>>>>>>>>>>>>	0	0	0	0	0	0	0	0	0	0	0	0	0	0	0	0	0	0	0	0	0	0	0	0	0	0	0	0	0	0	0	0	0	0	0	0	0	0	0	0
SRR5160291	CFSAN057847	feces	clinical-human	2014	Salmonella enterica	enterica	Enteritidis	Enteritidis	>>>>>>>>>>>>	0	0	0	0	0	0	0	0	0	0	0	0	0	0	0	0	0	0	0	0	0	0	0	0	0	0	0	0	0	0	0	0	0	0	0	0	0	0	0	0
SRR5160292	CFSAN057851	Fecal Swab	clinical-human	2014	Salmonella enterica	enterica	Enteritidis	Enteritidis	>>>>>>>>>>>>	0	0	0	0	0	0	0	0	0	0	0	0	0	0	0	0	0	0	0	0	0	0	0	0	0	0	0	0	0	0	0	0	0	0	0	0	0	0	0	0
SRR5160293	CFSAN057845	Chicken Carcasse	animal-based food	2014	Salmonella enterica	enterica	Enteritidis	Enteritidis	>>>>>>>>>>>>	0	0	0	0	0	0	0	0	0	0	0	0	0	0	0	0	0	0	0	0	0	0	0	0	0	0	0	0	0	0	0	0	0	0	0	0	0	0	0	0
SRR5160294	CFSAN057849	Fecal Swab	clinical-human	2014	Salmonella enterica	enterica	Enteritidis	Enteritidis	>>>>>>>>>>>>	0	0	0	0	0	0	0	0	0	0	0	0	0	0	0	0	0	0	0	0	0	0	0	0	0	0	0	0	0	0	0	0	0	0	0	0	0	0	0	0
SRR5160295	CFSAN057853	Frozen Chicken	animal-based food	2014	Salmonella enterica	enterica	Enteritidis	Enteritidis	>>>>>>>>>>>>	0	0	0	0	0	0	0	0	0	0	0	0	0	0	0	0	0	0	0	0	0	0	0	0	0	0	0	0	0	0	0	0	0	0	0	0	0	0	0	0
SRR5160296	CFSAN057848	missing	clinical-human	2014	Salmonella enterica	enterica	Enteritidis	Enteritidis	>>>>>>>>>>>>	0	0	0	0	0	0	0	0	0	0	0	0	0	0	0	0	0	0	0	0	0	0	0	0	0	0	0	0	0	0	0	0	0	0	0	0	0	0	0	0
SRR5160297	CFSAN057854	Ovary and Oviduct Pool	clinical-animal	2014	Salmonella enterica	enterica	Enteritidis	Enteritidis	>>>>>>>>>>>>	0	0	0	0	0	0	0	0	0	0	0	0	0	0	0	0	0	0	0	0	0	0	0	0	0	0	0	0	0	0	0	0	0	0	0	0	0	0	0	0
SRR5160298	CFSAN057843	feces	clinical-human	2013	Salmonella enterica	enterica	Enteritidis	Enteritidis	>>>>>>>>>>>>	0	0	0	0	0	0	0	0	0	0	0	0	0	0	0	0	0	0	0	0	0	0	0	0	0	0	0	0	0	0	0	0	0	0	0	0	0	0	0	0
SRR5160299	CFSAN057846	feces	clinical-human	2014	Salmonella enterica	enterica	Enteritidis	Enteritidis	>>>>>>>>>>>>	0	0	0	0	0	0	0	0	0	0	0	0	0	0	0	0	0	0	0	0	0	0	0	0	0	0	0	0	0	0	0	0	0	0	0	0	0	0	0	0
SRR5160300	CFSAN057858	meat	animal-based food	2014	Salmonella enterica	enterica	Enteritidis	Enteritidis	>>>>>>>>>>>>	0	0	0	1	0	0	0	0	0	0	0	0	1	0	0	0	0	0	0	0	0	0	0	0	0	0	0	0	0	0	0	0	0	0	0	0	0	0	0	0
SRR5160301	CFSAN057859	Fecal Swab	clinical-human	2014	Salmonella enterica	enterica	Enteritidis	Enteritidis	>>>>>>>>>>>>	0	0	0	0	0	0	0	0	0	0	0	0	0	0	0	0	0	0	0	0	0	0	0	0	0	0	0	0	0	0	0	0	0	0	0	0	0	0	0	0
SRR5160302	CFSAN057861	Blood Culture	clinical-human	2014	Salmonella enterica	enterica	Enteritidis	Enteritidis	>>>>>>>>>>>>	0	0	0	0	0	0	0	0	0	0	0	0	0	0	0	0	0	0	0	0	0	0	0	0	0	0	0	0	0	0	0	0	0	0	0	0	0	0	0	0
SRR5160303	CFSAN057860	Chicken Carcasse	animal-based food	2014	Salmonella enterica	enterica	Enteritidis	Enteritidis	>>>>>>>>>>>>	0	0	0	0	0	0	0	0	0	0	0	0	0	0	0	0	0	0	0	0	0	0	0	0	0	0	0	0	0	0	0	0	0	0	0	0	0	0	0	0
SRR5160304	CFSAN057856	blood	clinical-human	2014	Salmonella enterica	enterica	Enteritidis	Panama	>>>>>>>>>>>>	0	0	0	0	0	0	0	0	0	0	0	0	0	0	0	0	0	0	0	0	0	0	0	0	0	0	0	0	0	0	0	0	0	0	0	0	0	0	0	0
SRR5160305	CFSAN057857	Fecal Swab	clinical-human	2014	Salmonella enterica	enterica	Enteritidis	Cubana	>>>>>>>>>>>>	0	0	0	0	0	0	0	0	0	0	0	0	0	0	0	0	0	0	0	0	0	0	0	0	0	0	0	0	0	0	0	0	0	0	0	0	0	0	0	0
SRR5160306	CFSAN057863	Fecal Swab	clinical-human	2014	Salmonella enterica	enterica	Enteritidis	Enteritidis	>>>>>>>>>>>>	0	0	0	0	0	0	0	0	0	0	0	0	0	0	0	0	0	0	0	0	0	0	0	0	0	0	0	0	0	0	0	0	0	0	0	0	0	0	0	0
SRR5160307	CFSAN057864	blood	clinical-human	2014	Salmonella enterica	enterica	Enteritidis	Enteritidis	>>>>>>>>>>>>	0	0	0	0	0	0	0	0	0	0	0	0	0	0	0	0	0	0	0	0	0	0	0	0	0	0	0	0	0	0	0	0	0	0	0	0	0	0	0	0
SRR5160308	CFSAN057862	Food with Chicken Meat	animal-based food	2014	Salmonella enterica	enterica	Enteritidis	Enteritidis	>>>>>>>>>>>>	0	0	0	0	0	0	0	0	0	0	0	0	0	0	0	0	0	0	0	0	0	0	0	0	0	0	0	0	0	0	0	0	0	0	0	0	0	0	0	0
SRR5160310	CFSAN057866	Wound Secretion	clinical-human	2014	Salmonella enterica	enterica	Enteritidis	Enteritidis	>>>>>>>>>>>>	0	0	0	0	0	0	0	0	0	0	0	0	0	0	0	0	0	0	0	0	0	0	0	0	0	0	0	0	0	0	0	0	0	0	0	0	0	0	0	0
SRR5160312	CFSAN057820	chicken	animal-based food	1981	Salmonella enterica	enterica	Enteritidis	Enteritidis	>>>>>>>>>>>>	0	0	0	0	0	0	0	0	0	0	0	0	0	0	0	0	0	0	0	0	0	0	0	0	0	0	0	0	0	0	0	0	0	0	0	0	0	0	0	0
SRR5160314	CFSAN057823	missing	clinical-human	1985	Salmonella enterica	enterica	Enteritidis	Enteritidis	>>>>>>>>>>>>	0	0	0	0	0	0	0	0	0	0	0	0	0	0	0	0	0	0	0	0	0	0	0	0	0	0	0	0	0	0	0	0	0	0	0	0	0	0	0	0
SRR5160315	CFSAN057824	missing	clinical-human	1986	Salmonella enterica	enterica	Enteritidis	Dublin	>>>>>>>>>>>>	0	0	0	0	0	0	0	0	0	0	0	0	0	0	0	0	0	0	0	0	0	0	0	0	0	0	0	0	0	0	0	0	0	0	0	0	0	0	0	0
SRR5160316	CFSAN057822	missing	clinical-human	1985	Salmonella enterica	enterica	Enteritidis	Agona	>>>>>>>>>>>>	0	0	0	0	0	0	0	0	0	0	0	0	0	0	0	0	0	0	0	0	0	0	0	0	0	0	0	0	0	0	0	0	0	0	0	0	0	0	0	0
SRR5160317	CFSAN057819	chicken	animal-based food	1980	Salmonella enterica	enterica	Enteritidis	Enteritidis	>>>>>>>>>>>>	0	0	0	0	0	0	0	0	0	0	0	0	0	0	0	0	0	0	0	0	0	0	0	0	0	0	0	0	0	0	0	0	0	0	0	0	0	0	0	0
SRR5160318	CFSAN057821	missing	clinical-human	1982	Salmonella enterica	enterica	Enteritidis	Enteritidis	>>>>>>>>>>>>	0	0	0	0	0	0	0	0	0	0	0	0	0	0	0	0	0	0	0	0	0	0	0	0	0	0	0	0	0	0	0	0	0	0	0	0	0	0	0	0
SRR5160319	CFSAN057825	missing	clinical-human	1986	Salmonella enterica	enterica	Enteritidis	Enteritidis	>>>>>>>>>>>>	0	0	0	0	0	0	0	0	0	0	0	0	0	0	0	0	0	0	0	0	0	0	0	0	0	0	0	0	0	0	0	0	0	0	0	0	0	0	0	0
SRR5160320	CFSAN057830	missing	clinical-human	1989	Salmonella enterica	enterica	Enteritidis	Enteritidis	>>>>>>>>>>>>	0	0	0	0	0	0	0	1	0	0	1	0	0	0	0	0	0	0	0	0	1	0	0	0	0	0	0	0	0	0	0	0	0	0	0	1	0	0	0	0
SRR5160321	CFSAN057829	missing	clinical-human	1988	Salmonella enterica	enterica	Enteritidis	Enteritidis	>>>>>>>>>>>>	0	0	0	0	0	0	0	0	0	0	0	0	0	0	0	0	0	0	0	0	0	0	0	0	0	0	0	0	0	0	0	0	0	0	0	0	0	0	0	0
SRR5160322	CFSAN057826	missing	clinical-human	1986	Salmonella enterica	enterica	Enteritidis	Enteritidis	>>>>>>>>>>>>	0	0	0	0	0	0	0	0	0	0	0	0	0	0	0	0	0	0	0	0	0	0	0	0	0	0	0	0	0	0	0	0	0	0	0	0	0	0	0	0
SRR5160323	CFSAN057828	Raw Sausage	animal-based food	1988	Salmonella enterica	enterica	Enteritidis	Enteritidis	>>>>>>>>>>>>	0	0	0	0	0	0	0	0	0	0	0	0	0	0	0	0	0	0	0	0	0	0	0	0	0	0	0	0	0	0	0	0	0	0	0	0	0	0	0	0
SRR5160324	CFSAN057827	missing	clinical-human	1986	Salmonella enterica	enterica	Enteritidis	Enteritidis	>>>>>>>>>>>>	0	0	0	0	0	0	0	0	0	0	0	0	0	0	0	0	0	0	0	0	0	0	0	0	0	0	0	0	0	0	0	0	0	0	0	0	0	0	0	0
SRR5160325	CFSAN057831	missing	clinical-human	1989	Salmonella enterica	enterica	Enteritidis	Enteritidis	>>>>>>>>>>>>	0	0	0	0	0	0	0	0	0	0	0	0	0	0	0	0	0	0	0	0	1	0	0	0	0	0	0	0	0	0	0	0	0	0	0	0	0	0	0	0
SRR5160326	CFSAN057832	missing	clinical-human	1989	Salmonella enterica	enterica	Enteritidis	Enteritidis	>>>>>>>>>>>>	0	0	0	0	0	0	0	0	0	0	0	0	0	0	0	0	0	0	0	0	0	0	0	0	0	0	0	0	0	0	0	0	0	0	0	0	0	0	0	0
SRR5160381	CFSAN057833	missing	clinical-human	1989	Salmonella enterica	enterica	Enteritidis	Enteritidis	>>>>>>>>>>>>	0	0	0	0	0	0	0	1	0	0	1	0	0	0	0	0	0	0	0	0	0	0	0	0	0	0	0	0	0	0	0	0	0	0	0	1	0	0	0	0
SRR5160382	CFSAN057835	missing	clinical-human	1989	Salmonella enterica	enterica	Enteritidis	Enteritidis	>>>>>>>>>>>>	0	0	0	0	0	0	0	0	0	0	0	0	0	0	0	0	0	0	0	0	0	0	0	0	0	0	0	0	0	0	0	0	0	0	0	0	0	0	0	0
SRR5160383	CFSAN057838	chicken	animal-based food	1990	Salmonella enterica	enterica	Enteritidis	Enteritidis	>>>>>>>>>>>>	0	0	0	0	0	0	0	0	0	0	0	0	0	0	0	0	0	0	0	0	0	0	0	0	0	0	0	0	0	0	0	0	0	0	0	0	0	0	0	0
SRR5160384	CFSAN057837	chicken	animal-based food	1990	Salmonella enterica	enterica	Enteritidis	Enteritidis	>>>>>>>>>>>>	0	0	0	0	0	0	0	0	0	0	0	0	0	0	0	0	0	0	0	0	0	0	0	0	0	0	0	0	0	0	0	0	0	0	0	0	0	0	0	0
SRR5160386	CFSAN057834	missing	clinical-human	1989	Salmonella enterica	enterica	Enteritidis	Enteritidis	>>>>>>>>>>>>	0	0	0	0	0	0	0	0	0	0	0	0	0	0	0	0	0	0	0	0	0	0	0	0	0	0	0	0	0	0	0	0	0	0	0	0	0	0	0	0
SRR5160387	CFSAN057836	missing	clinical-human	1989	Salmonella enterica	enterica	Enteritidis	Enteritidis	>>>>>>>>>>>>	0	0	0	0	0	0	0	0	0	0	0	0	0	0	0	0	0	0	0	0	0	0	0	0	0	0	0	0	0	0	0	0	0	0	0	1	0	0	0	0
SRR5160388	CFSAN057840	chicken	animal-based food	1993	Salmonella enterica	enterica	Enteritidis	Enteritidis	>>>>>>>>>>>>	0	0	0	0	0	0	0	0	0	0	0	0	0	0	0	0	0	0	0	0	0	0	0	0	0	0	0	0	0	0	0	0	0	0	0	0	0	0	0	0
SRR5160389	CFSAN057841	chicken	animal-based food	1993	Salmonella enterica	enterica	Enteritidis	Enteritidis	>>>>>>>>>>>>	0	0	0	0	0	0	0	0	0	0	0	0	0	0	0	0	0	0	0	0	0	0	0	0	0	0	0	0	0	0	0	0	0	0	0	0	0	0	0	0
SRR5160408	CFSAN057759	Meconium	clinical-animal	2004	Salmonella enterica	enterica	Enteritidis	Enteritidis	>>>>>>>>>>>>	0	0	0	0	0	0	0	0	0	0	0	0	0	0	0	0	0	0	0	0	0	0	0	0	0	0	0	0	0	0	0	0	0	0	0	0	0	0	0	0
SRR5160413	CFSAN057761	Pecked Eggs/Organs	clinical-animal	2004	Salmonella enterica	enterica	Enteritidis	Enteritidis	>>>>>>>>>>>>	0	0	0	0	0	0	0	0	0	0	0	0	0	0	0	0	0	0	0	0	0	0	0	0	0	0	0	0	0	0	0	0	0	0	0	0	0	0	0	0
SRR5160414	CFSAN057760	Pecked Eggs/Organs	clinical-animal	2004	Salmonella enterica	enterica	Enteritidis	Enteritidis	>>>>>>>>>>>>	0	0	0	0	0	0	0	0	0	0	0	0	0	0	0	0	0	0	0	0	0	0	0	0	0	0	0	0	0	0	0	0	0	0	0	0	0	0	0	0
SRR5160416	CFSAN057764	Meconium	clinical-animal	2004	Salmonella enterica	enterica	Enteritidis	Enteritidis	>>>>>>>>>>>>	0	0	0	0	0	0	0	0	0	0	0	0	0	0	0	0	0	0	0	0	0	0	0	0	0	0	0	0	0	0	0	0	0	0	0	0	0	0	0	0
SRR5160417	CFSAN057769	Pecked Eggs/Yolk	clinical-animal	2005	Salmonella enterica	enterica	Enteritidis	Enteritidis	>>>>>>>>>>>>	0	0	0	0	0	0	0	0	0	0	0	0	0	0	0	0	0	0	0	0	0	0	0	0	0	0	0	0	0	0	0	0	0	0	0	0	1	0	0	0
SRR5160418	CFSAN057767	Pecked Eggs	clinical-animal	2005	Salmonella enterica	enterica	Enteritidis	Enteritidis	>>>>>>>>>>>>	0	0	0	0	0	0	0	0	0	0	0	0	0	0	0	0	0	0	0	0	0	0	0	0	0	0	0	0	0	0	0	0	0	0	0	0	0	0	0	0
SRR5160419	CFSAN057763	Meconium	clinical-animal	2004	Salmonella enterica	enterica	Enteritidis	Enteritidis	>>>>>>>>>>>>	0	0	0	0	0	0	0	0	0	0	0	0	0	0	0	0	0	0	0	0	0	0	0	0	0	0	0	0	0	0	0	0	0	0	0	0	0	0	0	0
SRR5160420	CFSAN057768	Meconium	clinical-animal	2005	Salmonella enterica	enterica	Enteritidis	Enteritidis	>>>>>>>>>>>>	0	0	0	0	0	0	0	0	0	0	0	0	0	0	0	0	0	0	0	0	0	0	0	0	0	0	0	0	0	0	0	0	0	0	0	0	1	0	0	0
SRR5160421	CFSAN057766	Box Swab	environment	2004	Salmonella enterica	enterica	Enteritidis	Enteritidis	>>>>>>>>>>>>	0	0	0	0	0	0	0	0	0	0	0	0	0	0	0	0	0	0	0	0	0	0	0	0	0	0	0	0	0	0	0	0	0	0	0	0	0	0	0	0
SRR5160422	CFSAN057762	Pecked Eggs/Caecum	clinical-animal	2004	Salmonella enterica	enterica	Enteritidis	Enteritidis	>>>>>>>>>>>>	0	0	0	0	0	0	0	0	0	0	0	0	0	0	0	0	0	0	0	0	0	0	0	0	0	0	0	0	0	0	0	0	0	0	0	0	0	0	0	0
SRR5160423	CFSAN057770	Dead Chicken	clinical-animal	2005	Salmonella enterica	enterica	Enteritidis	Enteritidis	>>>>>>>>>>>>	0	0	0	0	0	0	0	0	0	0	0	0	0	0	0	0	0	0	0	0	0	0	0	0	0	0	0	0	0	0	0	0	0	0	0	0	0	0	0	0
SRR5160424	CFSAN057765	Meconium	clinical-animal	2004	Salmonella enterica	enterica	Enteritidis	Enteritidis	>>>>>>>>>>>>	0	0	0	0	0	0	0	0	0	0	0	0	0	0	0	0	0	0	0	0	0	0	0	0	0	0	0	0	0	0	0	0	0	0	0	0	0	0	0	0
SRR5160425	CFSAN057771	Meconium	clinical-animal	2005	Salmonella enterica	enterica	Enteritidis	Enteritidis	>>>>>>>>>>>>	0	0	0	0	0	0	0	0	0	0	0	0	0	0	0	0	0	0	0	0	0	0	0	0	0	0	0	0	0	0	0	0	0	0	0	0	0	0	0	0
SRR5160519	CFSAN057782	Shoe Cover's of the Farm's Workers	environment	2006	Salmonella enterica	enterica	Enteritidis	Enteritidis	>>>>>>>>>>>>	0	0	0	0	0	0	0	0	0	0	0	0	0	0	0	0	0	0	0	0	0	0	0	0	0	0	0	0	0	0	0	0	0	0	0	0	0	0	0	0
SRR5160520	CFSAN057780	Pecked Eggs/Caecum	clinical-animal	2006	Salmonella enterica	enterica	Enteritidis	Enteritidis	>>>>>>>>>>>>	0	0	0	0	0	0	0	0	0	0	0	0	0	0	0	0	0	0	0	0	0	0	0	0	0	0	0	0	0	0	0	0	0	0	0	0	0	0	0	0
SRR5160521	CFSAN057775	Pecked Eggs/Organs	clinical-animal	2006	Salmonella enterica	enterica	Enteritidis	Enteritidis	>>>>>>>>>>>>	0	0	0	0	0	0	0	0	0	0	0	0	0	0	0	0	0	0	0	0	0	0	0	0	0	0	0	0	0	0	0	0	0	0	0	0	0	0	0	0
SRR5160523	CFSAN057778	Shoe Cover's of the Farm's Workers	environment	2006	Salmonella enterica	enterica	Enteritidis	Enteritidis	>>>>>>>>>>>>	0	0	0	0	0	0	0	0	0	0	0	0	0	0	0	0	0	0	0	0	0	0	0	0	0	0	0	0	0	0	0	0	0	0	0	0	0	0	0	0
SRR5160524	CFSAN057774	Dead Chicken	clinical-animal	2005	Salmonella enterica	enterica	Enteritidis	Enteritidis	>>>>>>>>>>>>	0	0	0	0	0	0	0	0	0	0	0	0	0	0	0	0	0	0	0	0	0	0	0	0	0	0	0	0	0	0	0	0	0	0	0	0	0	0	0	0
SRR5160525	CFSAN057776	Dead Chicken	clinical-animal	2006	Salmonella enterica	enterica	Enteritidis	Enteritidis	>>>>>>>>>>>>	0	0	0	0	0	0	0	0	0	0	0	0	0	0	0	0	0	0	0	0	0	0	0	0	0	0	0	0	0	0	0	0	0	0	0	0	0	0	0	0
SRR5160526	CFSAN057772	Live Chicken	clinical-animal	2005	Salmonella enterica	enterica	Enteritidis	Enteritidis	>>>>>>>>>>>>	0	0	0	0	0	0	0	0	0	0	0	0	0	0	0	0	0	0	0	0	0	0	0	0	0	0	0	0	0	0	0	0	0	0	0	0	0	0	0	0
SRR5160527	CFSAN057779	Pecked Eggs/Yolk	clinical-animal	2006	Salmonella enterica	enterica	Enteritidis	Enteritidis	>>>>>>>>>>>>	0	0	0	0	0	0	0	0	0	0	0	0	0	0	0	0	0	0	0	0	0	0	0	0	0	0	0	0	0	0	0	0	0	0	0	0	0	0	0	0
SRR5160531	CFSAN057773	Pecked Eggs/Yolk	clinical-animal	2005	Salmonella enterica	enterica	Enteritidis	Enteritidis	>>>>>>>>>>>>	0	0	0	0	0	0	0	0	0	0	0	0	0	0	0	0	0	0	0	0	0	0	0	0	0	0	0	0	0	0	0	0	0	0	0	0	0	0	0	0
SRR5160532	CFSAN057781	Pecked Eggs/Yolk	clinical-animal	2006	Salmonella enterica	enterica	Enteritidis	Enteritidis	>>>>>>>>>>>>	0	0	0	0	0	0	0	0	0	0	0	0	0	0	0	0	0	0	0	0	0	0	0	0	0	0	0	0	0	0	0	0	0	0	0	0	0	0	0	0
SRR5160545	CFSAN057783	Pecked Eggs/Yolk	clinical-animal	2006	Salmonella enterica	enterica	Enteritidis	Enteritidis	>>>>>>>>>>>>	0	0	0	0	0	0	0	0	0	0	0	0	0	0	0	0	0	0	0	0	0	0	0	0	0	0	0	0	0	0	0	0	0	0	0	0	0	0	0	0
SRR5160549	CFSAN057790	spleen	clinical-animal	2007	Salmonella enterica	enterica	Enteritidis	Enteritidis	>>>>>>>>>>>>	0	0	0	0	0	0	0	0	0	0	0	0	0	0	0	0	0	0	0	0	0	0	0	0	0	0	0	0	0	0	0	0	0	0	0	0	0	0	0	0
SRR5160633	CFSAN057786	Pecked Eggs/Organs	clinical-animal	2007	Salmonella enterica	enterica	Enteritidis	Enteritidis	>>>>>>>>>>>>	0	0	0	0	0	0	0	0	0	0	0	0	0	0	0	0	0	0	0	0	0	0	0	0	0	0	0	0	0	0	0	0	0	0	0	0	0	0	0	0
SRR5160634	CFSAN057784	Meconium	clinical-animal	2006	Salmonella enterica	enterica	Enteritidis	Enteritidis	>>>>>>>>>>>>	0	0	0	0	0	0	0	0	0	0	0	0	0	0	0	0	0	0	0	0	0	0	0	0	0	0	0	0	0	0	0	0	0	0	0	0	0	0	0	0
SRR5160635	CFSAN057788	Box Swab	environment	2007	Salmonella enterica	enterica	Enteritidis	Enteritidis	>>>>>>>>>>>>	0	0	0	0	0	0	0	0	0	0	0	0	0	0	0	0	0	0	0	0	0	0	0	0	0	0	0	0	0	0	0	0	0	0	0	0	0	0	0	0
SRR5160638	CFSAN057787	Gut	clinical-animal	2007	Salmonella enterica	enterica	Enteritidis	Enteritidis	>>>>>>>>>>>>	0	0	0	0	0	0	0	0	0	0	0	0	0	0	0	0	0	0	0	0	0	0	0	0	0	0	0	0	0	0	0	0	0	0	0	0	0	0	0	0
SRR5160639	CFSAN057789	Pecked Eggs/Organs	clinical-animal	2007	Salmonella enterica	enterica	Enteritidis	Enteritidis	>>>>>>>>>>>>	0	0	0	0	0	0	0	0	0	0	0	0	0	0	0	0	0	0	0	0	0	0	0	0	0	0	0	0	0	0	0	0	0	0	0	0	0	0	0	0
SRR5160640	CFSAN057785	Meconium	clinical-animal	2007	Salmonella enterica	enterica	Enteritidis	Enteritidis	>>>>>>>>>>>>	0	0	0	0	0	0	0	0	0	0	0	0	0	0	0	0	0	0	0	0	0	0	0	0	0	0	0	0	0	0	0	0	0	0	0	0	0	0	0	0
SRR5160641	CFSAN057793	Pecked Eggs/Yolk	clinical-animal	2007	Salmonella enterica	enterica	Enteritidis	Enteritidis	>>>>>>>>>>>>	0	0	0	0	0	0	0	0	0	0	0	0	0	0	0	0	0	0	0	0	0	0	0	0	0	0	0	0	0	0	0	0	0	0	0	0	1	0	0	0
SRR5160642	CFSAN057794	Pecked Eggs/Yolk	clinical-animal	2008	Salmonella enterica	enterica	Enteritidis	Enteritidis	>>>>>>>>>>>>	0	0	0	0	0	0	0	0	0	0	0	0	0	0	0	0	0	0	0	0	0	0	0	0	0	0	0	0	0	0	0	0	0	0	0	0	0	0	0	0
SRR5160643	CFSAN057791	Pecked Egg/Organs	clinical-animal	2007	Salmonella enterica	enterica	Enteritidis	Enteritidis	>>>>>>>>>>>>	0	0	0	0	0	0	0	0	0	0	0	0	0	0	0	0	0	0	0	0	0	0	0	0	0	0	0	0	0	0	0	0	0	0	0	0	0	0	0	0
SRR5160644	CFSAN057802	Shoe Cover's of the Farm's Workers	environment	2008	Salmonella enterica	enterica	Enteritidis	Enteritidis	>>>>>>>>>>>>	0	0	0	0	0	0	0	0	0	0	0	0	0	0	0	0	0	0	0	0	0	0	0	0	0	0	0	0	0	0	0	0	0	0	0	0	0	0	0	0
SRR5160645	CFSAN057792	Pecked Egg/Organs	clinical-animal	2007	Salmonella enterica	enterica	Enteritidis	Enteritidis	>>>>>>>>>>>>	0	0	0	0	0	0	0	0	0	0	0	0	0	0	0	0	0	0	0	0	0	0	0	0	0	0	0	0	0	0	0	0	0	0	0	0	0	0	0	0
SRR5160646	CFSAN057795	Pecked Eggs/Caecum	clinical-animal	2008	Salmonella enterica	enterica	Enteritidis	Enteritidis	>>>>>>>>>>>>	0	0	0	0	0	0	0	0	0	0	0	0	0	0	0	0	0	0	0	0	0	0	0	0	0	0	0	0	0	0	0	0	0	0	0	0	0	0	0	0
SRR5160647	CFSAN057803	Shoe Cover's of the Farm's Workers	environment	2008	Salmonella enterica	enterica	Enteritidis	Enteritidis	>>>>>>>>>>>>	0	0	0	0	0	0	0	0	0	0	0	0	0	0	0	0	0	0	0	0	0	0	0	0	0	0	0	0	0	0	0	0	0	0	0	0	1	0	0	0
SRR5160648	CFSAN057804	Shoe Cover's of the Farm's Workers	environment	2009	Salmonella enterica	enterica	Enteritidis	Enteritidis	>>>>>>>>>>>>	0	0	0	0	0	0	0	0	0	0	0	0	0	0	0	0	0	0	0	0	0	0	0	0	0	0	0	0	0	0	0	0	0	0	0	0	0	0	0	0
SRR5160649	CFSAN057800	cloacal swab	clinical-animal	2008	Salmonella enterica	enterica	Enteritidis	Enteritidis	>>>>>>>>>>>>	0	0	0	0	0	0	0	0	0	0	0	0	0	0	0	0	0	0	0	0	0	0	0	0	0	0	0	0	0	0	0	0	0	0	0	0	0	0	0	0
SRR5160650	CFSAN057805	cloacal swab	clinical-animal	2009	Salmonella enterica	enterica	Enteritidis	Enteritidis	>>>>>>>>>>>>	0	0	0	0	0	0	0	0	0	0	0	0	0	0	0	0	0	0	0	0	0	0	0	0	0	0	0	0	0	0	0	0	0	0	0	0	0	0	0	0
SRR5160658	CFSAN057807	Shoe Cover's of the Farm's Workers	environment	2009	Salmonella enterica	enterica	Enteritidis	Enteritidis	>>>>>>>>>>>>	0	0	0	0	0	0	0	0	0	0	0	0	0	0	0	0	0	0	0	0	0	0	0	0	0	0	0	0	0	0	0	0	0	0	0	0	0	0	0	0
SRR5160660	CFSAN057813	Shoe Cover's of the Farm's Workers	environment	2010	Salmonella enterica	enterica	Enteritidis	Enteritidis	>>>>>>>>>>>>	0	0	0	0	0	0	0	0	0	0	0	0	0	0	0	0	0	0	0	0	0	0	0	0	0	0	0	0	0	0	0	0	0	0	0	0	0	0	0	0
SRR5160663	CFSAN057811	Meconium	clinical-animal	2009	Salmonella enterica	enterica	Enteritidis	Enteritidis	>>>>>>>>>>>>	0	0	0	0	0	0	0	0	0	0	0	0	0	0	0	0	0	0	0	0	0	0	0	0	0	0	0	0	0	0	0	0	0	0	0	0	0	0	0	0
SRR5160664	CFSAN057814	chicken	animal-based food	2010	Salmonella enterica	enterica	Enteritidis	Enteritidis	>>>>>>>>>>>>	0	0	0	0	0	0	0	0	0	0	0	0	0	0	0	0	0	0	0	0	0	0	0	0	0	0	0	0	0	0	0	0	0	0	0	0	0	0	0	0
SRR5160665	CFSAN057812	Pecked Eggs/Caecum	clinical-animal	2009	Salmonella enterica	enterica	Enteritidis	Enteritidis	>>>>>>>>>>>>	0	0	0	0	0	0	0	0	0	0	0	0	0	0	0	0	0	0	0	0	0	0	0	0	0	0	0	0	0	0	0	0	0	0	0	0	0	0	1	0
SRR5160666	CFSAN057815	Shoe Cover's of the Farm's Workers	environment	2010	Salmonella enterica	enterica	Enteritidis	Enteritidis	>>>>>>>>>>>>	0	0	0	0	0	0	0	0	0	0	0	0	0	0	0	0	0	0	0	0	0	0	0	0	0	0	0	0	0	0	0	0	0	0	0	0	0	0	0	0
SRR5160668	CFSAN057816	Shoe Cover's of the Farm's Workers	environment	2010	Salmonella enterica	enterica	Enteritidis	Enteritidis	>>>>>>>>>>>>	0	0	0	0	0	0	0	0	0	0	0	0	0	0	0	0	0	0	0	0	0	0	0	0	0	0	0	0	0	0	0	0	0	0	0	0	0	0	0	0
SRR5173676	FDA00007925	lobster tails/frz	animal-based food	2012	Salmonella enterica	enterica	Saintpaul	Mbandaka	>>>>>>>>>>>>	0	0	0	0	0	0	0	0	0	0	0	0	0	0	0	0	0	0	0	0	0	0	0	0	0	0	0	0	0	0	0	0	0	0	0	0	0	0	0	0
SRR5173677	FDA00001071	fiber supplement	animal-based food	2006	Salmonella enterica	enterica	Tennessee	Yoruba	>>>>>>>>>>>>	0	0	0	0	0	0	0	0	0	0	0	0	0	0	0	0	0	0	0	0	0	0	0	0	0	0	0	0	0	0	0	0	0	0	0	0	0	0	0	0
SRR5173680	FDA00004565	pet treat/rawhides	animal-based food	2010	Salmonella enterica	enterica	Sandiego	Senftenberg	>>>>>>>>>>>>	0	0	0	0	0	0	0	0	0	0	0	0	0	0	1	0	0	0	0	0	0	1	0	0	0	0	0	0	0	0	0	0	0	0	0	0	0	0	0	0
SRR5173681	ADRDL-785	Pig Feces	clinical-animal	2000	Salmonella enterica	enterica	enteritidis	Enteritidis	>>>>>>>>>>>>	0	0	1	0	0	0	0	1	1	0	1	0	0	0	0	0	0	0	0	0	0	0	0	0	0	0	0	0	0	0	0	0	0	0	0	0	0	0	0	0
SRR5173682	ADRDL-779	Entrails Meal	animal-based food	2006	Salmonella enterica	enterica	Adelaide	Cerro	>>>>>>>>>>>>	0	0	0	0	0	0	0	0	0	0	0	0	0	0	0	0	0	0	0	0	0	0	0	0	0	0	0	0	0	0	0	0	0	0	0	0	0	0	0	0
SRR5175576	ADRDL-792	Entrails Meal	animal-based food	2006	Salmonella enterica	enterica	Senftenberg	Senftenberg	>>>>>>>>>>>>	0	0	0	0	0	0	0	0	0	0	0	0	0	0	1	0	0	0	0	0	0	1	0	0	0	0	0	0	0	0	0	0	0	0	0	0	0	0	0	0
SRR5181395	ADRDL-814	Entrails Meal	animal-based food	2006	Salmonella enterica	enterica	Adelaide	Adelaide	>>>>>>>>>>>>	0	0	0	0	0	0	0	0	0	0	0	0	0	0	0	0	0	0	0	0	0	0	0	0	0	0	0	0	0	0	0	0	0	0	0	0	0	0	0	0
SRR5181396	ADRDL-812	Poultry Carcass	animal-based food	1995	Salmonella enterica	enterica	enteritidis	Enteritidis	>>>>>>>>>>>>	0	0	0	0	0	0	0	0	0	0	0	0	0	0	0	0	0	0	0	0	0	0	0	0	0	0	0	0	0	0	0	0	0	0	0	0	0	0	0	0
SRR5181397	NC_SMi152	chicken carcass	animal-based food	2016	Salmonella enterica	enterica	Minnesota	Montevideo	>>>>>>>>>>>>	0	0	0	0	0	0	0	1	0	0	1	0	0	1	1	0	0	0	0	0	1	0	0	0	0	0	0	0	0	0	0	0	0	0	1	0	0	0	0	0
SRR5181441	ADRDL-802	Meat Meal	animal-based food	2003	Salmonella enterica	enterica	Senftenberg	Senftenberg	>>>>>>>>>>>>	0	0	0	0	0	0	0	0	0	0	0	0	0	0	0	0	0	0	0	0	0	0	0	0	0	0	0	0	0	0	0	0	0	0	0	0	0	0	0	0
SRR5182182	ADRDL-825	Cloacal Swab	clinical-animal	2011	Salmonella enterica	enterica	Senftenberg	Senftenberg	>>>>>>>>>>>>	0	0	0	0	0	0	0	0	0	0	0	0	0	0	1	0	0	0	0	0	0	1	0	0	0	0	0	0	0	0	0	0	0	0	0	0	0	0	0	0
SRR5232056	CFSAN057796	Pecked Eggs/Organs	clinical-animal	2008	Salmonella enterica	enterica	Enteritidis	Enteritidis	>>>>>>>>>>>>	0	0	0	0	0	0	0	0	0	0	0	0	0	0	0	0	0	0	0	0	0	0	0	0	0	0	0	0	0	0	0	0	0	0	0	0	0	0	0	0
SRR5232061	CFSAN057798	Meconium	clinical-animal	2008	Salmonella enterica	enterica	Enteritidis	Enteritidis	>>>>>>>>>>>>	0	0	0	0	0	0	0	0	0	0	0	0	0	0	0	0	0	0	0	0	0	0	0	0	0	0	0	0	0	0	0	0	0	0	0	0	0	0	0	0
SRR5232062	CFSAN057797	Meconium	clinical-animal	2008	Salmonella enterica	enterica	Enteritidis	Enteritidis	>>>>>>>>>>>>	0	0	0	0	0	0	0	0	0	0	0	0	0	0	0	0	0	0	0	0	0	0	0	0	0	0	0	0	0	0	0	0	0	0	0	0	0	0	0	0
SRR5232080	CFSAN057799	Meconium	clinical-animal	2008	Salmonella enterica	enterica	Enteritidis	Enteritidis	>>>>>>>>>>>>	0	0	0	0	0	0	0	0	0	0	0	0	0	0	0	0	0	0	0	0	0	0	0	0	0	0	0	0	0	0	0	0	0	0	0	0	0	0	0	0
SRR5232081	CFSAN057801	Shoe Cover's of the Farm's Workers	environment	2008	Salmonella enterica	enterica	Enteritidis	Enteritidis	>>>>>>>>>>>>	0	0	0	0	0	0	0	0	0	0	0	0	0	0	0	0	0	0	0	0	0	0	0	0	0	0	0	0	0	0	0	0	0	0	0	0	0	0	0	0
SRR5232082	CFSAN057808	Shoe Cover's of the Farm's Workers	environment	2009	Salmonella enterica	enterica	Enteritidis	Enteritidis	>>>>>>>>>>>>	0	0	0	0	0	0	0	0	0	0	0	0	0	0	0	0	0	0	0	0	0	0	0	0	0	0	0	0	0	0	0	0	0	0	0	0	0	0	0	0
SRR5232083	CFSAN057806	Meconium	clinical-animal	2009	Salmonella enterica	enterica	Enteritidis	Enteritidis	>>>>>>>>>>>>	0	0	0	0	0	0	0	0	0	0	0	0	0	0	0	0	0	0	0	0	0	0	0	0	0	0	0	0	0	0	0	0	0	0	0	0	0	0	0	0
SRR5232084	CFSAN057809	Shoe Cover's of the Farm's Workers	environment	2009	Salmonella enterica	enterica	Enteritidis	Enteritidis	>>>>>>>>>>>>	0	0	0	0	0	0	0	0	0	0	0	0	0	0	0	0	0	0	0	0	0	0	0	0	0	0	0	0	0	0	0	0	0	0	0	0	0	0	0	0
SRR5232085	CFSAN057810	Meconium	clinical-animal	2009	Salmonella enterica	enterica	Enteritidis	Enteritidis	>>>>>>>>>>>>	0	0	0	0	0	0	0	0	0	0	0	0	0	0	0	0	0	0	0	0	0	0	0	0	0	0	0	0	0	0	0	0	0	0	0	0	1	0	0	0
SRR5381280	CFSAN057744	Arugula	food	2007	Salmonella enterica	enterica	Enteritidis	Enteritidis	>>>>>>>>>>>>	0	0	0	0	0	0	0	0	0	0	0	0	0	0	0	0	0	0	0	0	0	0	0	0	0	0	0	0	0	0	0	0	0	0	0	0	0	0	0	0
SRR5819637	CFSAN057625	feces	clinical-human	1986	Salmonella enterica	enterica	Enteritidis	Enteritidis	>>>>>>>>>>>>	0	0	0	0	0	0	0	0	0	0	0	0	0	0	0	0	0	0	0	0	0	0	0	0	0	0	0	0	0	0	0	0	0	0	0	0	0	0	0	0
SRR5819643	CFSAN057851	Fecal Swab	clinical-human	2014	Salmonella enterica	enterica	Enteritidis	Enteritidis	>>>>>>>>>>>>	0	0	0	0	0	0	0	0	0	0	0	0	0	0	0	0	0	0	0	0	0	0	0	0	0	0	0	0	0	0	0	0	0	0	0	0	0	0	0	0
SRR5819786	CFSAN057625	feces	clinical-human	1986	Salmonella enterica	enterica	Enteritidis	Enteritidis	>>>>>>>>>>>>	0	0	0	0	0	0	0	0	0	0	0	0	0	0	0	0	0	0	0	0	0	0	0	0	0	0	0	0	0	0	0	0	0	0	0	0	0	0	0	0
SRR5819791	CFSAN057851	Fecal Swab	clinical-human	2014	Salmonella enterica	enterica	Enteritidis	Enteritidis	>>>>>>>>>>>>	0	0	0	0	0	0	0	0	0	0	0	0	0	0	0	0	0	0	0	0	0	0	0	0	0	0	0	0	0	0	0	0	0	0	0	0	0	0	0	0
SRR5883510	NC_SMi132	chicken carcass	animal-based food	2016	Salmonella enterica	enterica	Minnesota	Saintpaul	>>>>>>>>>>>>	0	0	0	0	0	0	0	0	0	0	0	0	0	0	0	0	0	0	0	0	0	0	0	0	0	0	0	0	0	0	0	0	0	0	0	0	0	0	0	0
SRR6038575	FDA00004747	dog toy, chewing leather strip	animal-based food	2011	Salmonella enterica	enterica	Schwarzengrund	Schwarzengrund	>>>>>>>>>>>>	0	0	0	0	0	0	0	0	0	0	0	0	0	0	0	0	0	0	0	0	0	0	0	0	0	0	0	0	0	0	0	0	0	0	0	0	0	0	0	0
SRR6171261	CFSAN033913	Ready-to-eat dish	food	2009	Salmonella enterica	enterica	Typhimurium	Typhimurium	>>>>>>>>>>>>	0	0	0	0	0	0	0	0	0	0	0	0	0	0	0	0	0	0	0	0	0	0	0	0	0	0	0	0	0	0	0	0	0	0	0	0	0	0	0	0
SRR6283069	CFSAN033912	Ready-to-eat dish	food	2009	Salmonella enterica	enterica	Typhimurium	Typhimurium	>>>>>>>>>>>>	0	0	1	0	0	1	0	1	1	0	1	0	0	1	0	0	0	0	0	0	1	1	0	0	0	0	0	0	0	0	0	0	0	0	0	0	0	0	0	0
SRR6283159	CFSAN033911	Ready-to-eat dish	food	2009	Salmonella enterica	enterica	Typhimurium	Typhimurium	>>>>>>>>>>>>	0	0	0	0	0	0	0	0	0	0	0	0	0	0	0	0	0	0	0	0	0	0	0	0	0	0	0	0	0	0	0	0	0	0	0	0	0	0	0	0
SRR6283291	CFSAN033910	food	food	2008	Salmonella enterica	enterica	Typhimurium	Typhimurium	>>>>>>>>>>>>	0	0	0	0	0	0	0	0	0	0	0	0	0	0	0	0	0	0	0	0	0	0	0	0	0	0	0	0	0	0	0	0	0	0	0	0	0	0	0	0
SRR6283292	CFSAN033908	Poultry	animal-based food	2006	Salmonella enterica	enterica	Typhimurium	Typhimurium	>>>>>>>>>>>>	0	0	1	0	0	0	0	0	1	0	0	0	0	1	1	0	0	0	0	0	0	0	0	0	0	0	0	0	0	0	0	0	0	0	0	1	0	0	0	0
SRR6283403	CFSAN033902	swine	animal-based food	2006	Salmonella enterica	enterica	Typhimurium	Typhimurium	>>>>>>>>>>>>	1	0	0	0	0	1	0	0	0	0	0	0	0	0	0	0	0	0	0	0	0	0	0	0	0	0	0	0	0	0	0	0	0	0	0	1	0	0	0	0
SRR6283416	CFSAN033901	swine	animal-based food	2006	Salmonella enterica	enterica	Typhimurium	Typhimurium	>>>>>>>>>>>>	0	0	0	0	0	0	0	0	0	0	0	0	0	0	0	0	0	0	0	0	0	0	0	0	0	0	0	0	0	0	0	0	0	0	0	0	0	0	0	0
SRR6283491	CFSAN033900	swine	animal-based food	2006	Salmonella enterica	enterica	Typhimurium	Typhimurium	>>>>>>>>>>>>	0	0	1	0	0	0	0	0	1	0	0	0	0	1	0	0	0	0	0	0	0	0	0	0	0	0	0	0	0	0	0	0	0	0	0	1	0	0	0	0
SRR6283504	CFSAN033899	swine	animal-based food	2006	Salmonella enterica	enterica	Typhimurium	Typhimurium	>>>>>>>>>>>>	0	0	0	0	0	0	0	1	0	0	1	0	0	0	0	0	0	0	0	0	1	0	0	0	0	0	0	0	0	0	0	0	0	0	1	0	0	0	0	0
SRR6283528	CFSAN033930	Swine (homemade salami)	animal-based food	2012	Salmonella enterica	enterica	Typhimurium	Typhimurium	>>>>>>>>>>>>	0	0	1	0	0	0	1	1	1	0	1	0	0	1	0	0	0	0	0	0	0	0	0	0	0	0	0	0	0	0	0	0	0	0	0	1	0	0	0	0
SRR6283551	CFSAN033929	Raw salad	food	2012	Salmonella enterica	enterica	Typhimurium	Anatum	>>>>>>>>>>>>	0	0	0	0	0	0	0	0	0	0	0	0	0	0	0	0	0	0	0	0	0	0	0	0	0	0	0	0	0	0	0	0	0	0	0	0	0	0	0	0
SRR6283624	CFSAN033927	Frozen chicken carcass	animal-based food	2011	Salmonella enterica	enterica	Typhimurium	Anatum	>>>>>>>>>>>>	0	0	0	0	0	0	0	0	0	0	0	0	0	0	0	0	0	0	0	0	0	0	0	0	0	0	0	0	0	0	0	0	0	0	0	0	0	0	0	0
SRR6283625	CFSAN033928	Cold chicken	animal-based food	2011	Salmonella enterica	enterica	Typhimurium	Typhimurium	>>>>>>>>>>>>	0	0	0	0	0	0	0	0	0	0	0	0	0	0	0	0	0	0	0	0	0	0	0	0	0	0	0	0	0	0	0	0	0	0	0	0	0	0	0	0
SRR6283626	CFSAN033926	chicken	animal-based food	2010	Salmonella enterica	enterica	Typhimurium	Typhimurium	>>>>>>>>>>>>	1	0	0	0	0	0	0	0	0	0	0	0	0	1	0	0	0	0	1	0	0	0	0	0	0	0	0	0	0	0	0	0	0	0	1	1	0	0	0	0
SRR6283673	CFSAN033925	chicken	animal-based food	2010	Salmonella enterica	enterica	Typhimurium	Typhimurium	>>>>>>>>>>>>	0	0	0	0	0	0	0	1	0	0	1	0	0	0	0	0	0	0	0	0	0	0	0	0	0	0	0	0	0	0	0	0	0	0	0	0	0	0	0	0
SRR6283999	CFSAN033924	swine	animal-based food	2010	Salmonella enterica	enterica	Typhimurium	Typhimurium	>>>>>>>>>>>>	0	0	0	0	0	0	1	1	0	1	1	0	0	0	0	0	0	0	0	0	1	0	0	0	0	0	0	0	0	0	0	0	0	0	0	1	0	0	0	0
SRR6286511	CFSAN033922	chicken	animal-based food	2010	Salmonella enterica	enterica	Typhimurium	Give	>>>>>>>>>>>>	0	0	0	0	0	0	0	0	0	0	0	0	0	0	0	0	0	0	0	0	0	0	0	0	0	0	0	0	0	0	0	0	0	0	0	0	0	0	0	0
SRR6286518	CFSAN033921	Frozen chicken carcass	animal-based food	2010	Salmonella enterica	enterica	Typhimurium	Typhimurium	>>>>>>>>>>>>	0	0	1	0	0	1	0	1	1	0	1	0	0	1	0	0	0	0	0	0	1	1	0	0	0	0	0	0	0	0	0	0	0	0	1	0	0	0	0	0
SRR6286530	CFSAN033851	feces	clinical-human	1983	Salmonella enterica	enterica	Typhimurium	Typhimurium	>>>>>>>>>>>>	0	0	0	0	0	0	1	1	0	1	1	0	0	0	0	0	0	0	0	0	0	0	0	0	0	0	0	0	0	0	0	0	0	0	0	0	0	0	0	0
SRR6519507	NC_SI06	broiler chicken	animal-based food	2015	Salmonella enterica	enterica	Infantis	Abaetetuba	>>>>>>>>>>>>	0	0	0	0	0	0	0	0	0	0	0	0	0	0	0	0	0	0	0	0	0	0	0	0	0	0	0	0	0	0	0	0	0	0	0	0	0	0	0	0
SRR6519509	NC_SI07	broiler chicken	animal-based food	2015	Salmonella enterica	enterica	Infantis	Typhimurium	>>>>>>>>>>>>	0	0	0	0	0	0	0	0	0	0	0	0	0	0	1	0	0	0	0	0	0	1	0	0	0	0	0	0	0	0	0	0	0	0	0	1	0	0	0	0
SRR6526095	CFSAN033850	feces	clinical-human	1983	Salmonella enterica	enterica	Typhimurium	Ohio	>>>>>>>>>>>>	0	0	0	0	0	0	0	0	0	0	0	0	0	0	0	0	0	0	0	0	0	0	0	0	0	0	0	0	0	0	0	0	0	0	0	0	0	0	0	0
SRR6545188	NC_SI017	broiler chicken	animal-based food	2016	Salmonella enterica	enterica	Infantis	Infantis	>>>>>>>>>>>>	0	0	0	0	0	0	0	0	0	0	0	0	0	0	1	0	0	0	0	0	0	0	0	0	0	0	0	0	0	0	0	0	0	0	0	1	0	0	0	0
SRR6627701	NC_SI018	broiler chicken	animal-based food	2016	Salmonella enterica	enterica	Infantis	Infantis	>>>>>>>>>>>>	0	0	0	0	0	0	0	0	0	0	0	0	0	0	1	0	0	0	0	0	0	0	0	0	0	0	0	0	0	0	0	0	0	0	0	1	0	0	0	0
SRR6635765	NC_SI02	broiler chicken	animal-based food	2015	Salmonella enterica	enterica	Infantis	Mbandaka	>>>>>>>>>>>>	0	0	0	0	0	0	0	0	0	0	0	0	0	0	0	0	0	0	0	0	0	0	0	0	0	0	0	0	0	0	0	0	0	0	0	0	0	0	0	0
SRR6635766	NC_SI03	broiler chicken	animal-based food	2015	Salmonella enterica	enterica	Infantis	Infantis	>>>>>>>>>>>>	0	0	0	0	0	0	0	0	0	0	0	0	0	0	0	0	0	0	0	0	0	0	0	0	0	0	0	0	0	0	0	0	0	0	0	0	0	0	0	0
SRR6635768	CFSAN033938	Final product sales (animal origin)	animal-based food	2013	Salmonella enterica	enterica	Typhimurium	Typhimurium	>>>>>>>>>>>>	1	0	0	0	0	0	0	1	0	0	1	0	0	1	0	0	0	0	1	0	0	0	0	0	0	0	0	0	0	0	0	0	0	0	0	1	0	0	0	0
SRR6635771	CFSAN033936	Final product sales (animal origin)	animal-based food	2013	Salmonella enterica	enterica	Typhimurium	Typhimurium	>>>>>>>>>>>>	0	0	0	0	0	0	0	0	0	0	0	0	0	0	0	0	0	0	0	0	0	1	0	0	0	0	0	0	0	0	0	0	0	0	0	1	0	0	0	0
SRR6635773	CFSAN033934	Final product sales (animal origin)	animal-based food	2013	Salmonella enterica	enterica	Typhimurium	Montevideo	>>>>>>>>>>>>	0	0	0	0	0	0	0	0	0	0	0	0	0	0	0	0	0	0	0	0	0	0	0	0	0	0	0	0	0	0	0	0	0	0	0	0	0	0	0	0
SRR6635775	CFSAN033933	Final product sales (animal origin)	animal-based food	2013	Salmonella enterica	enterica	Typhimurium	Typhimurium	>>>>>>>>>>>>	0	0	0	0	0	0	0	0	0	0	0	0	0	0	1	0	0	0	0	0	0	1	0	0	0	0	0	0	0	0	0	0	0	0	0	1	0	0	0	0
SRR6684719	CFSAN033932	Roast beef	animal-based food	2012	Salmonella enterica	enterica	Typhimurium	Typhimurium	>>>>>>>>>>>>	0	0	0	0	0	1	0	0	0	0	0	0	0	1	0	0	0	0	1	0	0	0	0	0	0	0	0	0	0	0	0	0	0	0	0	0	0	0	0	1
SRR6690140	CFSAN033931	Swine (homemade salami)	animal-based food	2012	Salmonella enterica	enterica	Typhimurium	Typhimurium	>>>>>>>>>>>>	0	0	0	0	0	0	0	0	0	0	0	0	0	0	0	0	0	0	0	0	0	0	0	0	0	0	0	0	0	0	0	0	0	0	0	0	0	0	0	0
SRR6690141	CFSAN033856	feces	clinical-human	1984	Salmonella enterica	enterica	Typhimurium	Typhimurium	>>>>>>>>>>>>	0	0	0	0	0	1	0	0	0	0	0	0	0	1	0	0	0	0	1	0	0	0	0	0	0	0	0	0	0	0	0	0	0	0	0	0	0	0	0	0
SRR6690142	CFSAN033854	feces	clinical-human	1983	Salmonella enterica	enterica	Typhimurium	Typhimurium	>>>>>>>>>>>>	0	0	0	0	0	0	0	0	0	0	0	0	0	0	0	0	0	0	0	0	0	0	0	0	0	0	0	0	0	0	0	1	0	0	0	0	0	0	0	0
SRR6690143	CFSAN033853	feces	clinical-human	1983	Salmonella enterica	enterica	Typhimurium	Typhimurium	>>>>>>>>>>>>	0	0	0	0	0	0	0	0	0	0	0	0	0	1	0	0	0	0	1	0	0	0	0	0	0	0	0	0	0	0	0	0	0	0	0	0	0	0	0	0
SRR6690144	CFSAN033852	feces	clinical-human	1983	Salmonella enterica	enterica	Typhimurium	Typhimurium	>>>>>>>>>>>>	0	0	0	0	0	1	0	0	0	0	0	0	0	1	0	0	0	0	1	0	0	0	0	0	0	0	0	0	0	0	0	0	0	0	0	0	0	0	0	0
SRR6690145	CFSAN033869	feces	clinical-human	1986	Salmonella enterica	enterica	Typhimurium	Typhimurium	>>>>>>>>>>>>	0	0	0	0	0	1	0	0	0	0	0	0	0	1	0	0	0	0	1	0	0	0	0	0	0	0	0	0	0	0	0	0	0	0	0	0	0	0	0	0
SRR6690146	CFSAN033868	feces	clinical-human	1986	Salmonella enterica	enterica	Typhimurium	Typhimurium	>>>>>>>>>>>>	0	0	0	0	0	0	0	1	0	0	1	0	0	0	0	0	0	0	0	0	0	0	0	0	0	0	0	0	0	0	0	0	0	0	0	0	0	0	0	0
SRR6690147	CFSAN033867	feces	clinical-human	1986	Salmonella enterica	enterica	Typhimurium	Typhimurium	>>>>>>>>>>>>	0	0	0	0	0	0	0	0	0	0	0	0	0	0	0	0	0	0	0	0	0	0	0	0	0	0	0	0	0	0	0	0	0	0	0	1	0	0	0	0
SRR6690148	CFSAN033866	feces	clinical-human	1986	Salmonella enterica	enterica	Typhimurium	Typhimurium	>>>>>>>>>>>>	0	0	0	0	0	0	0	0	0	0	0	0	0	0	0	0	0	0	0	0	0	0	0	0	0	0	0	0	0	0	0	0	0	0	0	0	0	0	0	0
SRR6690149	CFSAN033865	feces	clinical-human	1985	Salmonella enterica	enterica	Typhimurium	Typhimurium	>>>>>>>>>>>>	0	0	0	0	0	0	0	0	0	0	0	0	0	0	0	0	0	0	0	0	0	0	0	0	0	0	0	0	0	0	0	0	0	0	0	0	0	0	0	0
SRR6690150	CFSAN033864	feces	clinical-human	1985	Salmonella enterica	enterica	Typhimurium	Typhimurium	>>>>>>>>>>>>	0	0	0	0	0	0	0	0	0	0	0	0	0	0	0	0	0	0	0	0	0	0	0	0	0	0	0	0	0	0	0	0	0	0	0	0	0	0	0	0
SRR6690151	CFSAN033863	feces	clinical-human	1985	Salmonella enterica	enterica	Typhimurium	Typhimurium	>>>>>>>>>>>>	0	0	0	0	0	0	0	0	0	0	0	0	0	0	0	0	0	0	0	0	0	0	0	0	0	0	0	0	0	0	0	0	0	0	0	0	0	0	0	0
SRR6690152	CFSAN033862	feces	clinical-human	1985	Salmonella enterica	enterica	Typhimurium	Typhimurium	>>>>>>>>>>>>	0	0	0	0	0	0	0	0	0	0	0	0	0	0	0	0	0	0	0	0	0	0	0	0	0	0	0	0	0	0	0	0	0	0	0	1	0	0	0	0
SRR6690154	CFSAN033861	feces	clinical-human	1984	Salmonella enterica	enterica	Typhimurium	Typhimurium	>>>>>>>>>>>>	0	0	0	0	0	0	0	0	0	0	0	0	0	0	0	0	0	0	0	0	0	0	0	0	0	0	0	0	0	0	0	0	0	0	0	0	0	0	0	0
SRR6690155	CFSAN033860	feces	clinical-human	1984	Salmonella enterica	enterica	Typhimurium	Typhimurium	>>>>>>>>>>>>	0	0	0	0	0	0	0	0	0	0	0	0	0	0	0	0	0	0	0	0	0	0	0	0	0	0	0	0	0	0	0	0	0	0	0	0	0	0	0	0
SRR6690156	CFSAN033859	feces	clinical-human	1984	Salmonella enterica	enterica	Typhimurium	Typhimurium	>>>>>>>>>>>>	0	0	0	0	0	0	0	0	0	0	0	0	0	0	0	0	0	0	0	0	0	0	0	0	0	0	0	0	0	0	0	0	0	0	0	0	0	0	0	0
SRR6690157	CFSAN033858	feces	clinical-human	1984	Salmonella enterica	enterica	Typhimurium	Typhimurium	>>>>>>>>>>>>	0	0	0	0	0	0	0	0	0	0	0	0	0	1	0	0	0	0	1	0	0	0	0	0	0	0	0	0	0	0	0	0	0	0	0	1	0	0	0	0
SRR6690658	CFSAN033857	feces	clinical-human	1984	Salmonella enterica	enterica	Typhimurium	Typhimurium	>>>>>>>>>>>>	0	0	1	0	0	0	0	1	1	0	1	0	0	0	0	0	0	0	0	0	1	0	0	0	1	0	0	0	0	0	0	0	0	0	1	0	0	0	0	0
SRR6690659	CFSAN033875	feces	clinical-human	1988	Salmonella enterica	enterica	Typhimurium	Typhimurium	>>>>>>>>>>>>	0	0	0	0	0	0	0	0	0	0	0	0	0	0	0	0	0	0	0	0	0	0	0	0	0	0	0	0	0	0	0	0	0	0	0	0	0	0	0	0
SRR6690660	CFSAN033874	feces	clinical-human	1986	Salmonella enterica	enterica	Typhimurium	Typhimurium	>>>>>>>>>>>>	0	0	0	0	0	0	0	1	0	0	1	0	0	0	0	0	0	0	0	0	0	0	0	0	0	0	0	0	0	0	0	0	0	0	0	0	0	0	0	0
SRR6690661	CFSAN033873	feces	clinical-human	1986	Salmonella enterica	enterica	Typhimurium	Typhimurium	>>>>>>>>>>>>	0	0	0	0	0	0	0	0	0	0	0	1	0	1	0	0	0	0	1	0	0	0	0	0	0	0	0	0	0	0	0	0	0	0	0	0	0	0	0	1
SRR6690662	CFSAN033872	feces	clinical-human	1986	Salmonella enterica	enterica	Typhimurium	Typhimurium	>>>>>>>>>>>>	0	0	0	0	0	0	0	0	0	0	0	0	0	0	0	0	0	0	0	0	0	0	0	0	0	0	0	0	0	0	0	0	0	0	0	0	0	0	0	0
SRR6690663	CFSAN033887	Lettuce	food	1998	Salmonella enterica	enterica	Typhimurium	Typhimurium	>>>>>>>>>>>>	0	0	0	0	0	0	0	1	0	0	1	0	0	0	1	0	0	0	0	0	0	1	0	0	0	0	0	0	0	0	0	0	1	0	0	0	0	0	0	0
SRR6690664	CFSAN033886	feces	clinical-human	1998	Salmonella enterica	enterica	Typhimurium	Typhimurium	>>>>>>>>>>>>	0	0	0	0	0	0	0	0	0	0	0	0	0	0	0	0	0	0	0	0	0	0	0	0	0	0	0	0	0	0	0	0	0	0	0	0	0	0	0	0
SRR6690665	CFSAN033885	feces	clinical-human	1997	Salmonella enterica	enterica	Typhimurium	Typhimurium	>>>>>>>>>>>>	0	0	0	0	0	0	0	1	0	0	1	0	0	0	0	0	0	0	0	0	1	0	0	0	0	0	0	0	0	0	0	0	0	0	1	0	0	0	0	0
SRR6690667	CFSAN033884	Raw pork sausage	animal-based food	1996	Salmonella enterica	enterica	Typhimurium	Typhimurium	>>>>>>>>>>>>	0	0	0	0	0	0	0	0	0	0	0	0	0	1	0	0	0	0	0	0	0	0	0	0	0	0	0	0	0	0	0	0	0	0	0	0	0	0	0	0
SRR6690668	CFSAN033883	Cold chicken	animal-based food	1995	Salmonella enterica	enterica	Typhimurium	Typhimurium	>>>>>>>>>>>>	0	0	0	0	1	0	0	0	0	0	0	0	0	1	0	0	0	0	1	0	0	0	0	0	0	0	0	0	0	0	0	0	0	0	0	0	0	0	0	0
SRR6690669	CFSAN033882	feces	clinical-human	1995	Salmonella enterica	enterica	Typhimurium	Typhimurium	>>>>>>>>>>>>	0	0	0	0	1	0	0	0	0	0	0	0	0	1	0	0	0	0	1	0	0	0	0	0	0	0	0	0	0	0	0	0	0	0	0	0	0	0	0	0
SRR6690670	CFSAN033881	feces	clinical-human	1993	Salmonella enterica	enterica	Typhimurium	Typhimurium	>>>>>>>>>>>>	0	0	0	0	0	0	0	1	0	0	1	0	0	0	0	0	0	0	0	0	0	0	0	0	0	0	0	0	0	0	0	0	0	0	0	0	0	0	0	0
SRR6690671	CFSAN033880	feces	clinical-human	1992	Salmonella enterica	enterica	Typhimurium	Typhimurium	>>>>>>>>>>>>	0	0	0	0	0	0	0	0	0	0	0	1	0	1	0	0	0	0	1	0	0	0	0	0	0	0	0	0	0	0	0	0	0	0	0	0	0	0	0	1
SRR6690673	CFSAN033879	feces	clinical-human	1992	Salmonella enterica	enterica	Typhimurium	Typhimurium	>>>>>>>>>>>>	0	0	0	0	0	0	0	0	0	0	0	0	0	0	0	0	0	0	0	0	0	0	0	0	0	0	0	0	0	0	0	0	0	0	0	0	0	0	0	0
SRR6690674	CFSAN033878	feces	clinical-human	1991	Salmonella enterica	enterica	Typhimurium	Typhimurium	>>>>>>>>>>>>	0	0	0	0	0	0	0	0	0	0	0	0	0	0	0	0	0	0	0	0	0	0	0	0	0	0	0	0	0	0	0	0	0	0	0	0	0	0	0	0
SRR6690675	CFSAN033877	feces	clinical-human	1990	Salmonella enterica	enterica	Typhimurium	Typhimurium	>>>>>>>>>>>>	0	0	0	0	0	0	0	0	0	0	0	0	0	0	0	0	0	0	0	0	0	0	0	0	0	0	0	0	0	0	0	0	0	0	0	0	0	0	0	0
SRR6690676	CFSAN033876	feces	clinical-human	1989	Salmonella enterica	enterica	Typhimurium	Typhimurium	>>>>>>>>>>>>	0	0	0	0	0	0	0	0	0	0	0	0	0	0	0	0	0	0	0	0	0	0	0	0	0	0	0	0	0	0	0	0	0	0	0	0	0	0	0	0
SRR6690677	CFSAN033871	feces	clinical-human	1986	Salmonella enterica	enterica	Typhimurium	Typhimurium	>>>>>>>>>>>>	0	0	0	0	0	0	0	1	0	0	1	0	0	0	0	0	0	0	0	0	0	0	0	0	0	0	0	0	0	0	0	0	0	0	0	0	0	0	0	0
SRR6690678	CFSAN033870	feces	clinical-human	1986	Salmonella enterica	enterica	Typhimurium	Typhimurium	>>>>>>>>>>>>	0	0	1	0	0	0	0	1	1	0	1	0	0	0	0	0	0	0	0	0	0	0	0	0	0	0	0	0	0	0	0	0	0	0	0	0	0	0	0	0
SRR6690680	CFSAN033892	Raw pork sausage	animal-based food	2000	Salmonella enterica	enterica	Typhimurium	Typhimurium	>>>>>>>>>>>>	0	0	0	0	0	0	0	0	0	0	0	0	0	0	0	0	0	0	0	0	0	0	0	0	0	0	0	0	0	0	0	0	0	0	0	0	0	0	0	0
SRR6690681	CFSAN033891	blood	clinical-human	2000	Salmonella enterica	enterica	Typhimurium	Typhimurium	>>>>>>>>>>>>	0	0	0	0	0	0	0	0	0	0	0	0	0	0	0	0	0	0	0	0	0	0	0	0	0	0	0	0	0	0	0	0	0	0	0	0	0	0	0	0
SRR6690683	CFSAN033889	feces	clinical-human	1999	Salmonella enterica	enterica	Typhimurium	Typhimurium	>>>>>>>>>>>>	0	0	0	0	0	0	0	1	0	0	1	0	0	0	0	0	0	0	0	0	0	0	0	0	0	0	0	0	0	0	0	0	0	0	0	0	0	0	0	0
SRR6690684	CFSAN033888	Raw kafta	animal-based food	1998	Salmonella enterica	enterica	Typhimurium	Typhimurium	>>>>>>>>>>>>	0	0	0	0	0	0	0	0	0	0	0	0	0	0	0	0	0	0	0	0	0	0	0	0	0	0	0	0	0	0	0	0	0	0	0	0	0	0	0	0
SRR6690685	CFSAN033896	feces	clinical-human	2010	Salmonella enterica	enterica	Typhimurium	I 1,4,[5],12:i:-	>>>>>>>>>>>>	0	0	0	0	0	0	0	0	0	0	0	0	0	0	0	0	0	0	0	0	0	0	0	0	0	0	0	0	0	0	0	0	0	0	0	0	0	0	0	0
SRR6690686	CFSAN033895	brain abscess	clinical-human	2005	Salmonella enterica	enterica	Typhimurium	Typhimurium	>>>>>>>>>>>>	0	0	0	0	0	1	0	0	0	0	0	1	0	1	0	0	0	0	1	0	0	0	0	0	0	0	0	0	0	0	0	0	0	0	0	0	0	0	0	1
SRR6690687	CFSAN033894	feces	clinical-human	2003	Salmonella enterica	enterica	Typhimurium	Typhimurium	>>>>>>>>>>>>	0	0	0	0	0	0	0	0	0	0	0	0	0	0	1	0	0	0	0	0	0	1	0	0	0	0	0	0	0	0	0	0	0	0	0	0	0	0	0	0
SRR6690688	PP_BR007	blood	clinical-human	2014	Salmonella enterica	enterica	Typhimurium	Typhimurium	>>>>>>>>>>>>	0	0	0	0	1	0	0	0	0	0	0	0	0	1	0	0	0	0	1	0	0	0	0	0	0	0	0	0	0	0	0	0	0	0	0	0	0	0	0	0
SRR6690690	PP_BR026	blood	clinical-human	2012	Salmonella enterica	enterica	Typhimurium	Typhimurium	>>>>>>>>>>>>	0	0	0	0	0	0	0	0	0	0	0	0	0	0	0	0	0	0	0	0	0	0	0	0	0	0	0	0	0	0	0	0	0	0	0	0	0	0	0	0
SRR6690691	PP_BR031	wound	clinical-human	2012	Salmonella enterica	enterica	Typhimurium	Typhimurium	>>>>>>>>>>>>	0	0	0	0	0	0	0	0	0	0	0	0	0	0	0	0	0	0	0	0	0	0	0	0	0	0	0	0	0	0	0	0	0	0	0	0	0	0	0	0
SRR6690692	PP_BR027	wound	clinical-human	2012	Salmonella enterica	enterica	Typhimurium	Typhimurium	>>>>>>>>>>>>	0	0	0	0	0	0	0	1	0	0	1	0	0	0	0	0	0	0	0	0	0	0	0	0	0	0	0	0	0	0	0	0	0	0	0	0	0	0	0	0
SRR6690693	PP_BR032	Wound	clinical-human	2012	Salmonella enterica	enterica	Typhimurium	Typhimurium	>>>>>>>>>>>>	0	0	0	0	0	0	0	0	0	0	0	0	0	0	0	0	0	0	0	0	0	0	0	0	0	0	0	0	0	0	0	0	0	0	0	0	0	0	0	0
SRR6690694	PP_BR045	Stool	clinical-human	2011	Salmonella enterica	enterica	Typhimurium	Typhimurium	>>>>>>>>>>>>	0	0	0	0	0	0	0	0	0	0	0	0	0	1	0	0	0	0	1	0	0	0	0	0	0	0	0	0	0	0	0	0	0	0	0	1	0	0	0	1
SRR6690695	PP_BR057	blood	clinical-human	2011	Salmonella enterica	enterica	Typhimurium	Typhimurium	>>>>>>>>>>>>	0	0	0	0	0	0	0	0	0	0	0	0	0	0	0	0	0	0	0	0	0	0	0	0	0	0	0	0	0	0	0	0	0	0	0	0	0	0	0	0
SRR6690696	PP_BR059	stool	clinical-human	2011	Salmonella enterica	enterica	Typhimurium	Typhimurium	>>>>>>>>>>>>	0	0	0	0	0	0	0	0	0	0	0	0	0	0	0	0	0	0	1	0	0	0	0	0	0	0	0	0	0	0	0	0	0	0	0	0	0	0	0	0
SRR6690697	PP_BR060	stool	clinical-human	2011	Salmonella enterica	enterica	Typhimurium	Typhimurium	>>>>>>>>>>>>	0	0	0	0	0	0	0	0	0	0	0	0	0	0	0	0	0	0	0	0	0	0	0	0	0	0	0	0	0	0	0	0	0	0	0	0	0	0	0	0
SRR6690698	PP_BR062	Stool	clinical-human	2010	Salmonella enterica	enterica	Typhimurium	Typhimurium	>>>>>>>>>>>>	0	0	0	0	0	0	0	0	0	0	0	0	0	0	0	0	0	0	0	0	0	0	0	0	0	0	0	0	0	0	0	1	0	0	0	0	0	0	0	0
SRR6690699	PP_BR063	Blood	clinical-human	2010	Salmonella enterica	enterica	Typhimurium	Typhimurium	>>>>>>>>>>>>	0	0	0	0	0	0	0	0	0	0	0	0	0	0	0	0	0	0	0	0	0	0	0	0	0	0	0	0	0	0	0	0	0	0	0	1	0	0	0	0
SRR6690700	PP_BR076	stool	clinical-human	2010	Salmonella enterica	enterica	Typhimurium	Typhimurium	>>>>>>>>>>>>	0	0	0	0	0	0	0	0	0	0	0	0	0	0	0	0	0	0	0	0	0	0	0	0	0	0	0	0	0	0	0	0	0	0	0	0	0	0	0	0
SRR6690701	CFSAN068031	Herd environment	environment	2006	Salmonella enterica	enterica	Typhimurium	Typhimurium	>>>>>>>>>>>>	0	0	0	0	0	0	0	0	0	0	0	0	0	0	0	0	0	0	0	0	0	0	0	0	0	0	0	0	0	0	0	0	0	0	0	0	0	0	0	0
SRR6690702	CFSAN068035	urine	clinical-animal	2011	Salmonella enterica	enterica	Typhimurium	Typhimurium	>>>>>>>>>>>>	0	0	0	0	0	0	0	0	0	0	0	0	0	0	1	0	0	0	0	0	0	1	0	0	0	0	0	0	0	0	0	0	0	0	0	1	0	0	0	0
SRR6690703	CFSAN068046	mesenteric lymph node	clinical-animal	2005	Salmonella enterica	enterica	Typhimurium	Typhimurium	>>>>>>>>>>>>	0	0	1	0	0	1	0	1	1	0	1	0	1	0	0	0	0	0	0	0	0	1	0	0	0	0	0	0	0	0	0	0	0	0	0	1	0	0	0	0
SRR6690704	CFSAN068045	mesenteric lymph node	clinical-animal	2005	Salmonella enterica	enterica	Typhimurium	Typhimurium	>>>>>>>>>>>>	0	0	0	0	0	1	0	0	0	0	0	0	0	1	0	0	0	0	1	0	0	0	0	0	0	0	0	0	0	0	0	0	0	0	0	0	0	0	0	0
SRR6690705	CFSAN068032	feces	clinical-animal	2008	Salmonella enterica	enterica	Typhimurium	Typhimurium	>>>>>>>>>>>>	0	0	0	0	1	0	0	0	0	0	0	0	0	1	0	0	0	0	1	0	0	0	0	0	0	0	0	0	0	0	0	0	0	0	0	0	0	0	0	0
SRR6690706	CFSAN068043	mesenteric lymph node	clinical-animal	2005	Salmonella enterica	enterica	Typhimurium	Typhimurium	>>>>>>>>>>>>	0	0	0	0	0	1	0	0	0	0	0	0	0	0	0	0	0	0	1	0	0	0	0	0	0	0	0	0	0	0	0	0	0	0	0	1	0	0	0	0
SRR6690707	CFSAN068041	herd environment	environment	2007	Salmonella enterica	enterica	Typhimurium	Typhimurium	>>>>>>>>>>>>	0	0	0	0	0	0	0	0	0	0	0	0	0	0	0	0	0	0	0	0	0	0	0	0	0	0	0	0	0	0	0	0	0	0	0	0	0	0	0	0
SRR6690708	CFSAN068030	feces	clinical-animal	2008	Salmonella enterica	enterica	Typhimurium	Typhimurium	>>>>>>>>>>>>	1	0	0	0	0	0	0	1	0	0	1	0	0	1	0	0	0	0	1	0	0	0	0	0	0	0	0	0	0	0	0	0	0	0	0	1	0	0	0	0
SRR6690709	CFSAN068040	mesenteric lymph node	clinical-animal	2005	Salmonella enterica	enterica	Typhimurium	Typhimurium	>>>>>>>>>>>>	0	0	0	0	0	0	0	0	0	0	0	0	0	0	0	0	0	0	0	0	0	0	0	0	0	0	0	0	0	0	0	0	0	0	0	0	0	0	0	0
SRR6690710	CFSAN068029	feces	clinical-animal	2004	Salmonella enterica	enterica	Typhimurium	Typhimurium	>>>>>>>>>>>>	0	0	0	0	0	0	0	0	0	0	0	0	0	0	0	0	0	0	0	0	0	0	0	0	0	0	0	0	0	0	0	0	0	0	0	0	0	0	0	0
SRR6690713	CFSAN068039	swab swine carcass	clinical-animal	2012	Salmonella enterica	enterica	Typhimurium	Typhimurium	>>>>>>>>>>>>	0	0	0	0	0	0	0	1	0	0	1	0	0	0	0	0	0	0	1	0	0	0	0	0	0	0	0	0	0	0	0	0	0	0	0	1	0	0	0	0
SRR6690714	CFSAN068038	swab swine carcass	clinical-animal	2012	Salmonella enterica	enterica	Typhimurium	Typhimurium	>>>>>>>>>>>>	0	0	0	0	0	0	0	0	0	0	0	0	0	0	0	0	0	0	0	0	0	0	0	0	0	0	0	0	0	0	0	0	0	0	0	0	0	0	0	0
SRR6690718	CFSAN068047	mesenteric lymph node	clinical-animal	2005	Salmonella enterica	enterica	Typhimurium	Typhimurium	>>>>>>>>>>>>	0	0	0	0	0	0	0	1	0	0	1	0	0	0	0	0	0	0	0	0	0	0	0	0	0	0	0	0	0	0	0	0	0	0	0	0	0	0	0	0
SRR6690719	CFSAN068037	swab swine carcass	clinical-animal	2012	Salmonella enterica	enterica	Typhimurium	Typhimurium	>>>>>>>>>>>>	0	0	0	0	0	0	0	0	0	0	0	0	0	0	0	0	0	0	0	0	0	0	0	0	0	0	0	0	0	0	0	0	0	0	0	0	0	0	0	0
SRR6690720	CFSAN068033	mesenteric lymph node	clinical-animal	2000	Salmonella enterica	enterica	Typhimurium	Typhimurium	>>>>>>>>>>>>	0	0	0	0	0	0	0	0	0	0	0	0	0	0	0	0	0	0	0	0	0	0	0	0	0	0	0	0	0	0	0	0	0	0	0	0	0	0	0	0
SRR6690726	CFSAN068044	mesenteric lymph node	clinical-animal	2005	Salmonella enterica	enterica	Typhimurium	Typhimurium	>>>>>>>>>>>>	0	0	0	0	0	1	0	0	0	0	0	0	0	1	0	0	0	0	1	0	0	0	0	0	0	0	0	0	0	0	0	0	0	0	0	0	0	0	0	1
SRR6690727	CFSAN068028	inguinal lymph node	clinical-animal	2004	Salmonella enterica	enterica	Typhimurium	Typhimurium	>>>>>>>>>>>>	0	0	0	0	0	0	0	0	0	0	0	0	0	0	0	0	0	0	0	0	0	0	0	0	0	0	0	0	0	0	0	0	0	0	0	0	0	0	0	0
SRR6690728	CFSAN068034	urine	clinical-animal	2011	Salmonella enterica	enterica	Typhimurium	Typhimurium	>>>>>>>>>>>>	0	0	0	0	0	0	0	0	0	0	0	0	0	1	0	0	0	0	0	0	0	0	0	0	0	0	0	0	0	0	0	0	0	0	0	0	0	0	0	0
SRR6690730	CFSAN068042	herd environment	environment	2006	Salmonella enterica	enterica	Typhimurium	Typhimurium	>>>>>>>>>>>>	0	0	0	0	0	1	0	0	0	0	0	0	0	1	0	0	0	0	1	0	0	0	0	0	0	0	0	0	0	0	0	0	0	0	1	0	0	0	0	0
SRR6690732	NC_ST010	broiler chicken	animal-based food	2015	Salmonella enterica	enterica	Typhimurium	Typhimurium	>>>>>>>>>>>>	0	1	0	0	0	0	0	1	0	0	1	0	0	0	1	0	0	0	0	0	0	0	0	0	0	0	0	0	0	0	0	0	0	0	0	1	0	0	0	0
SRR6690733	NC_ST012	broiler chicken	animal-based food	2015	Salmonella enterica	enterica	Typhimurium	Typhimurium	>>>>>>>>>>>>	0	0	0	0	0	0	0	0	0	0	0	0	0	0	0	0	0	0	1	0	0	0	0	0	0	0	0	0	0	0	0	0	0	0	0	1	0	0	0	0
SRR6690735	NC_STy011	broiler chicken	animal-based food	2015	Salmonella enterica	enterica	Typhimurium	Typhimurium	>>>>>>>>>>>>	0	0	0	0	0	0	0	1	0	0	1	0	0	0	0	0	0	0	0	0	0	0	0	0	0	0	0	0	0	0	0	0	0	0	0	0	0	0	0	0
SRR6690737	NC_STy05	broiler chicken	animal-based food	2015	Salmonella enterica	enterica	Typhimurium	Typhimurium	>>>>>>>>>>>>	0	0	0	0	0	0	0	0	0	0	0	0	0	0	0	0	0	0	0	0	0	0	0	0	0	0	0	0	0	0	0	0	0	0	0	0	0	0	0	0
SRR6690738	NC_STy017	broiler chicken	animal-based food	2016	Salmonella enterica	enterica	Typhimurium	Typhimurium	>>>>>>>>>>>>	0	0	0	0	0	0	0	0	0	0	0	0	0	0	0	0	0	0	0	0	0	0	0	0	0	0	0	0	0	0	0	0	0	0	0	0	0	0	0	0
SRR6690741	NC_ST020	broiler chicken	animal-based food	2016	Salmonella enterica	enterica	Typhimurium	Typhimurium	>>>>>>>>>>>>	0	0	0	0	0	0	0	1	0	0	1	0	0	0	0	0	0	0	0	0	0	0	0	0	0	0	0	0	0	0	0	0	0	0	0	0	0	0	0	0
SRR6690743	NC_STy09	broiler chicken	animal-based food	2015	Salmonella enterica	enterica	Typhimurium	Typhimurium	>>>>>>>>>>>>	0	0	0	0	1	1	0	0	0	0	0	0	0	1	0	0	0	0	1	0	0	0	0	0	0	0	0	0	0	0	0	0	0	0	0	0	0	0	0	0
SRR6690744	NC_STy04	broiler chicken	animal-based food	2015	Salmonella enterica	enterica	Typhimurium	Typhimurium	>>>>>>>>>>>>	0	0	0	0	0	0	0	0	0	0	0	0	0	0	0	0	0	0	1	0	0	0	0	0	0	0	0	0	0	0	0	0	0	0	0	0	0	0	0	0
SRR6696881	CFSAN060422	blood	clinical-human	1984	Salmonella enterica	enterica	Dublin	Dublin	>>>>>>>>>>>>	0	0	0	0	0	0	0	0	0	0	0	0	0	0	0	0	0	0	0	0	0	0	0	0	0	0	0	0	0	0	0	0	0	0	0	0	0	0	0	0
SRR6696882	CFSAN060474	biological fluid or tissue	clinical-animal	1997	Salmonella enterica	enterica	Dublin	Dublin	>>>>>>>>>>>>	0	0	0	0	0	0	0	0	0	0	0	0	0	0	0	0	0	0	0	0	0	0	0	0	0	0	0	0	0	0	0	0	0	0	0	0	0	0	0	0
SRR6696883	CFSAN060419	Liquor	clinical-human	1983	Salmonella enterica	enterica	Dublin	Dublin	>>>>>>>>>>>>	0	0	0	0	0	0	0	0	0	0	0	0	0	0	0	0	0	0	0	0	0	0	0	0	0	0	0	0	0	0	0	0	0	0	0	0	0	0	0	0
SRR6696884	CFSAN060473	biological fluid or tissue	clinical-animal	1997	Salmonella enterica	enterica	Dublin	Dublin	>>>>>>>>>>>>	0	0	0	0	0	0	0	0	0	0	0	0	0	0	0	0	0	0	0	0	0	0	0	0	0	0	0	0	0	0	0	0	0	0	0	0	0	0	0	0
SRR6696885	CFSAN060472	biological fluid or tissue	clinical-animal	1997	Salmonella enterica	enterica	Dublin	Dublin	>>>>>>>>>>>>	0	0	0	0	0	0	0	0	0	0	0	0	0	0	0	0	0	0	0	0	0	0	0	0	0	0	0	0	0	0	0	0	0	0	0	0	0	0	0	0
SRR6696886	CFSAN060455	blood	clinical-human	1992	Salmonella enterica	enterica	Dublin	Dublin	>>>>>>>>>>>>	0	0	0	0	0	0	0	0	0	0	0	0	0	0	0	0	0	0	0	0	0	0	0	0	0	0	0	0	0	0	0	0	0	0	0	0	0	0	0	0
SRR6696887	CFSAN060454	feces	clinical-human	1992	Salmonella enterica	enterica	Dublin	Dublin	>>>>>>>>>>>>	0	0	0	0	0	0	0	0	0	0	0	0	0	0	0	0	0	0	0	0	0	0	0	0	0	0	0	0	0	0	0	0	0	0	0	0	0	0	0	0
SRR6697007	CFSAN060500	brain	clinical-animal	2003	Salmonella enterica	enterica	Dublin	Dublin	>>>>>>>>>>>>	0	0	0	0	0	0	0	0	0	0	0	0	0	0	0	0	0	0	0	0	0	0	0	0	0	0	0	0	0	0	0	0	0	0	0	0	0	0	0	0
SRR6697008	CFSAN060437	blood	clinical-human	1990	Salmonella enterica	enterica	Dublin	Dublin	>>>>>>>>>>>>	0	0	0	0	0	0	0	0	0	0	0	0	0	0	0	0	0	0	0	0	0	0	0	0	0	0	0	0	0	0	0	0	0	0	0	0	0	0	0	0
SRR6697510	CFSAN060420	blood	clinical-human	1984	Salmonella enterica	enterica	Dublin	Dublin	>>>>>>>>>>>>	0	0	0	0	0	0	0	0	0	0	0	0	0	0	0	0	0	0	0	0	0	0	0	0	0	0	0	0	0	0	0	0	0	0	0	0	0	0	0	0
SRR6698012	CFSAN060438	Liquor	clinical-human	1990	Salmonella enterica	enterica	Dublin	Dublin	>>>>>>>>>>>>	0	0	0	0	0	0	0	0	0	0	0	0	0	0	0	0	0	0	0	0	0	0	0	0	0	0	0	0	0	0	0	0	0	0	0	0	0	0	0	0
SRR6698013	CFSAN060503	blood	clinical-human	2003	Salmonella enterica	enterica	Dublin	Dublin	>>>>>>>>>>>>	0	0	0	0	0	0	0	0	0	0	0	0	0	0	0	0	0	0	0	0	0	0	0	0	0	0	0	0	0	0	0	0	0	0	0	0	0	0	0	0
SRR6698014	CFSAN060505	blood	clinical-human	2003	Salmonella enterica	enterica	Dublin	Dublin	>>>>>>>>>>>>	0	0	0	0	0	0	0	0	0	0	0	0	0	0	0	0	0	0	0	0	0	0	0	0	0	0	0	0	0	0	0	0	0	0	0	0	0	0	0	0
SRR6698515	CFSAN060519	biological fluid or tissue	clinical-animal	2013	Salmonella enterica	enterica	Dublin	Dublin	>>>>>>>>>>>>	0	0	0	0	0	0	0	0	0	0	0	0	0	0	0	0	0	0	0	0	0	0	0	0	0	0	0	0	0	0	0	0	0	0	0	0	0	0	0	0
SRR6699016	CFSAN060518	biological fluid or tissue	clinical-animal	2013	Salmonella enterica	enterica	Dublin	Dublin	>>>>>>>>>>>>	0	0	0	0	0	0	0	0	0	0	0	0	0	0	0	0	0	0	0	0	0	0	0	0	0	0	0	0	0	0	0	0	0	0	0	0	0	0	0	0
SRR6699518	CFSAN060517	blood	clinical-human	2010	Salmonella enterica	enterica	Dublin	Dublin	>>>>>>>>>>>>	0	0	0	0	0	0	0	0	0	0	0	0	0	0	0	0	0	0	0	0	0	0	0	0	0	0	0	0	0	0	0	0	0	0	1	0	0	0	0	0
SRR6701097	CFSAN060436	Liquor	clinical-human	1990	Salmonella enterica	enterica	Dublin	Dublin	>>>>>>>>>>>>	0	0	0	0	0	0	0	0	0	0	0	0	0	0	0	0	0	0	0	0	0	0	0	0	0	0	0	0	0	0	0	0	0	0	0	0	0	0	0	0
SRR6701098	CFSAN060504	blood	clinical-human	2003	Salmonella enterica	enterica	Dublin	Dublin	>>>>>>>>>>>>	0	0	0	0	0	0	0	0	0	0	0	0	0	0	0	0	0	0	0	0	0	0	0	0	0	0	0	0	0	0	0	0	0	0	0	0	0	0	0	0
SRR6701100	CFSAN060471	biological fluid or tissue	clinical-animal	1997	Salmonella enterica	enterica	Dublin	Dublin	>>>>>>>>>>>>	0	0	0	0	0	0	0	0	0	0	0	0	0	0	0	0	0	0	0	0	0	0	0	0	0	0	0	0	0	0	0	0	0	0	0	0	0	0	0	0
SRR6701101	CFSAN060470	feces	clinical-animal	1997	Salmonella enterica	enterica	Dublin	Dublin	>>>>>>>>>>>>	0	0	0	0	0	0	0	0	0	0	0	0	0	0	0	0	0	0	0	0	0	0	0	0	0	0	0	0	0	0	0	0	0	0	0	0	0	0	0	0
SRR6701102	CFSAN060521	blood	clinical-human	2013	Salmonella enterica	enterica	Dublin	Dublin	>>>>>>>>>>>>	0	0	0	0	0	0	0	0	0	0	0	0	0	0	0	0	0	0	0	0	0	0	0	0	0	0	0	0	0	0	0	0	0	0	0	0	0	0	0	0
SRR6701103	CFSAN060520	blood	clinical-human	2013	Salmonella enterica	enterica	Dublin	Dublin	>>>>>>>>>>>>	0	0	0	0	0	0	0	0	0	0	0	0	0	0	0	0	0	0	0	0	0	0	0	0	0	0	0	0	0	0	0	0	0	0	0	0	0	0	0	0
SRR6701109	CFSAN060480	blood	clinical-human	1998	Salmonella enterica	enterica	Dublin	Dublin	>>>>>>>>>>>>	0	0	0	0	0	0	0	0	0	0	0	0	0	0	0	0	0	0	0	0	0	0	0	0	0	0	0	0	0	0	0	0	0	0	1	0	0	0	0	0
SRR6701111	CFSAN060425	blood	clinical-human	1987	Salmonella enterica	enterica	Dublin	Dublin	>>>>>>>>>>>>	0	0	0	0	0	0	0	0	0	0	0	0	0	0	0	0	0	0	0	0	0	0	0	0	0	0	0	0	0	0	0	0	0	0	0	0	0	0	0	0
SRR6701112	CFSAN060469	biological fluid or tissue	clinical-animal	1997	Salmonella enterica	enterica	Dublin	Dublin	>>>>>>>>>>>>	0	0	0	0	0	0	0	0	0	0	0	0	0	0	0	0	0	0	0	0	0	0	0	0	0	0	0	0	0	0	0	0	0	0	0	0	0	0	0	0
SRR6701113	CFSAN060469	biological fluid or tissue	clinical-animal	1997	Salmonella enterica	enterica	Dublin	Dublin	>>>>>>>>>>>>	0	0	0	0	0	0	0	0	0	0	0	0	0	0	0	0	0	0	0	0	0	0	0	0	0	0	0	0	0	0	0	0	0	0	0	0	0	0	0	0
SRR6701114	CFSAN060460	Liquor	clinical-human	1993	Salmonella enterica	enterica	Dublin	Dublin	>>>>>>>>>>>>	0	0	0	0	0	0	0	0	0	0	0	0	0	0	0	0	0	0	0	0	0	0	0	0	0	0	0	0	0	0	0	0	0	0	0	0	0	0	0	0
SRR6701115	CFSAN060481	blood	clinical-human	1998	Salmonella enterica	enterica	Dublin	Dublin	>>>>>>>>>>>>	0	0	0	0	0	0	0	0	0	0	0	0	0	0	0	0	0	0	0	0	0	0	0	0	0	0	0	0	0	0	0	0	0	0	0	0	0	0	0	0
SRR6701116	CFSAN060481	blood	clinical-human	1998	Salmonella enterica	enterica	Dublin	Dublin	>>>>>>>>>>>>	0	0	0	0	0	0	0	0	0	0	0	0	0	0	0	0	0	0	0	0	0	0	0	0	0	0	0	0	0	0	0	0	0	0	0	0	0	0	0	0
SRR6701117	CFSAN060465	blood	clinical-human	1995	Salmonella enterica	enterica	Dublin	Dublin	>>>>>>>>>>>>	0	0	0	0	0	0	0	0	0	0	0	0	0	0	0	0	0	0	0	0	0	0	0	0	0	0	0	0	0	0	0	0	0	0	0	0	0	0	0	0
SRR6701118	CFSAN060421	blood	clinical-human	1984	Salmonella enterica	enterica	Dublin	Dublin	>>>>>>>>>>>>	0	0	0	0	0	0	0	0	0	0	0	0	0	0	0	0	0	0	0	0	0	0	0	0	0	0	0	0	0	0	0	0	0	0	0	0	0	0	0	0
SRR6701119	CFSAN060453	biological fluid or tissue	clinical-animal	1992	Salmonella enterica	enterica	Dublin	Dublin	>>>>>>>>>>>>	0	0	0	0	0	0	0	0	0	0	0	0	0	0	0	0	0	0	0	0	0	0	0	0	0	0	0	0	0	0	0	0	0	0	0	0	0	0	0	0
SRR6701120	CFSAN060452	blood	clinical-human	1992	Salmonella enterica	enterica	Dublin	Dublin	>>>>>>>>>>>>	0	0	0	0	0	0	0	0	0	0	0	0	0	0	0	0	0	0	0	0	0	0	0	0	0	0	0	0	0	0	0	0	0	0	0	0	0	0	0	0
SRR6701121	CFSAN060449	blood	clinical-human	1991	Salmonella enterica	enterica	Dublin	Dublin	>>>>>>>>>>>>	0	0	0	0	0	0	0	0	0	0	0	0	0	0	0	0	0	0	0	0	0	0	0	0	0	0	0	0	0	0	0	0	0	0	0	0	0	0	0	0
SRR6701122	CFSAN060459	blood	clinical-human	1993	Salmonella enterica	enterica	Dublin	Dublin	>>>>>>>>>>>>	0	0	0	0	0	0	0	0	0	0	0	0	0	0	0	0	0	0	0	0	0	0	0	0	0	0	0	0	0	0	0	0	0	0	0	0	0	0	0	0
SRR6701123	CFSAN060475	biological fluid or tissue	clinical-animal	1997	Salmonella enterica	enterica	Dublin	Dublin	>>>>>>>>>>>>	0	0	0	0	0	0	0	0	0	0	0	0	0	0	0	0	0	0	0	0	0	0	0	0	0	0	0	0	0	0	0	0	0	0	0	0	0	0	0	0
SRR6701124	CFSAN060424	blood	clinical-human	1985	Salmonella enterica	enterica	Dublin	Dublin	>>>>>>>>>>>>	0	0	0	0	0	0	0	0	0	0	0	0	0	0	0	0	0	0	0	0	0	0	0	0	0	0	0	0	0	0	0	0	0	0	0	0	0	0	0	0
SRR6701125	CFSAN060484	blood	clinical-human	1998	Salmonella enterica	enterica	Dublin	Dublin	>>>>>>>>>>>>	0	0	0	0	0	0	0	0	0	0	0	0	0	0	0	0	0	0	0	0	0	0	0	0	0	0	0	0	0	0	0	0	0	0	0	0	0	0	0	0
SRR6701127	CFSAN060468	biological fluid or tissue	clinical-animal	1997	Salmonella enterica	enterica	Dublin	Dublin	>>>>>>>>>>>>	0	0	0	0	0	0	0	0	0	0	0	0	0	0	0	0	0	0	0	0	0	0	0	0	0	0	0	0	0	0	0	0	0	0	0	0	0	0	0	0
SRR6701128	CFSAN060456	blood	clinical-human	1992	Salmonella enterica	enterica	Dublin	Dublin	>>>>>>>>>>>>	0	0	0	0	0	0	0	0	0	0	0	0	0	0	0	0	0	0	0	0	0	0	0	0	0	0	0	0	0	0	0	0	0	0	0	0	0	0	0	0
SRR6701129	CFSAN060431	blood	clinical-human	1988	Salmonella enterica	enterica	Dublin	Dublin	>>>>>>>>>>>>	0	0	0	0	0	0	0	0	0	0	0	0	0	0	0	0	0	0	0	0	0	0	0	0	0	0	0	0	0	0	0	0	0	0	0	0	0	0	0	0
SRR6701131	CFSAN060488	biological fluid or tissue	clinical-animal	1998	Salmonella enterica	enterica	Dublin	Dublin	>>>>>>>>>>>>	0	0	0	0	0	0	0	0	0	0	0	0	0	0	0	0	0	0	0	0	0	0	0	0	0	0	0	0	0	0	0	0	0	0	0	0	0	0	0	0
SRR6701133	CFSAN060427	blood	clinical-human	1987	Salmonella enterica	enterica	Dublin	Dublin	>>>>>>>>>>>>	0	0	0	0	0	0	0	0	0	0	0	0	0	0	0	0	0	0	0	0	0	0	0	0	0	0	0	0	0	0	0	0	0	0	0	0	0	0	0	0
SRR6701433	CFSAN060487	brain	clinical-animal	1998	Salmonella enterica	enterica	Dublin	Dublin	>>>>>>>>>>>>	0	0	0	0	0	0	0	0	0	0	0	0	0	0	0	0	0	0	0	0	0	0	0	0	0	0	0	0	0	0	0	0	0	0	0	0	0	0	0	0
SRR6701434	CFSAN060491	liver	clinical-animal	1998	Salmonella enterica	enterica	Dublin	Dublin	>>>>>>>>>>>>	0	0	0	0	0	0	0	0	0	0	0	0	0	0	0	0	0	0	0	0	0	0	0	0	0	0	0	0	0	0	0	0	0	0	0	0	0	0	0	0
SRR6701435	CFSAN060445	urine	clinical-human	1991	Salmonella enterica	enterica	Dublin	Dublin	>>>>>>>>>>>>	0	0	0	0	0	0	0	0	0	0	0	0	0	0	0	0	0	0	0	0	0	0	0	0	0	0	0	0	0	0	0	0	0	0	0	0	0	0	0	0
SRR6701436	CFSAN060445	urine	clinical-human	1991	Salmonella enterica	enterica	Dublin	Dublin	>>>>>>>>>>>>	0	0	0	0	0	0	0	0	0	0	0	0	0	0	0	0	0	0	0	0	0	0	0	0	0	0	0	0	0	0	0	0	0	0	0	0	0	0	0	0
SRR6701441	CFSAN060494	missing	clinical-human	1999	Salmonella enterica	enterica	Dublin	Dublin	>>>>>>>>>>>>	0	0	0	0	0	0	0	0	0	0	0	0	0	0	0	0	0	0	0	0	0	0	0	0	0	0	0	0	0	0	0	0	0	0	0	0	0	0	0	0
SRR6701444	CFSAN060492	missing	clinical-human	1999	Salmonella enterica	enterica	Dublin	Dublin	>>>>>>>>>>>>	0	0	0	0	0	0	0	0	0	0	0	0	0	0	0	0	0	0	0	0	0	0	0	0	0	0	0	0	0	0	0	0	0	0	0	0	0	0	0	0
SRR6701446	CFSAN060432	blood	clinical-human	1988	Salmonella enterica	enterica	Dublin	Dublin	>>>>>>>>>>>>	0	0	0	0	0	0	0	0	0	0	0	0	0	0	0	0	0	0	0	0	0	0	0	0	0	0	0	0	0	0	0	0	0	0	0	0	0	0	0	0
SRR6701447	CFSAN060432	blood	clinical-human	1988	Salmonella enterica	enterica	Dublin	Dublin	>>>>>>>>>>>>	0	0	0	0	0	0	0	0	0	0	0	0	0	0	0	0	0	0	0	0	0	0	0	0	0	0	0	0	0	0	0	0	0	0	0	0	0	0	0	0
SRR6701449	CFSAN060433	blood	clinical-human	1988	Salmonella enterica	enterica	Dublin	Dublin	>>>>>>>>>>>>	0	0	0	0	0	0	0	0	0	0	0	0	0	0	0	0	0	0	0	0	0	0	0	0	0	0	0	0	0	0	0	0	0	0	0	0	0	0	0	0
SRR6701451	CFSAN060440	blood	clinical-human	1990	Salmonella enterica	enterica	Dublin	Dublin	>>>>>>>>>>>>	0	0	0	0	0	0	0	0	0	0	0	0	0	0	0	0	0	0	0	0	0	0	0	0	0	0	0	0	0	0	0	0	0	0	0	0	0	0	0	0
SRR6701452	CFSAN060501	biological fluid or tissue	clinical-animal	2003	Salmonella enterica	enterica	Dublin	Dublin	>>>>>>>>>>>>	0	0	0	0	0	0	0	0	0	0	0	0	0	0	0	0	0	0	0	0	0	0	0	0	0	0	0	0	0	0	0	0	0	0	0	0	0	0	0	0
SRR6701623	CFSAN060442	blood	clinical-human	1990	Salmonella enterica	enterica	Dublin	Dublin	>>>>>>>>>>>>	0	0	0	0	0	0	0	0	0	0	0	0	0	0	0	0	0	0	0	0	0	0	0	0	0	0	0	0	0	0	0	0	0	0	0	0	0	0	0	0
SRR6701624	CFSAN060441	blood	clinical-human	1990	Salmonella enterica	enterica	Dublin	Dublin	>>>>>>>>>>>>	0	0	0	0	0	0	0	0	0	0	0	0	0	0	0	0	0	0	0	0	0	0	0	0	0	0	0	0	0	0	0	0	0	0	0	0	0	0	0	0
SRR6701625	CFSAN060441	blood	clinical-human	1990	Salmonella enterica	enterica	Dublin	Dublin	>>>>>>>>>>>>	0	0	0	0	0	0	0	0	0	0	0	0	0	0	0	0	0	0	0	0	0	0	0	0	0	0	0	0	0	0	0	0	0	0	0	0	0	0	0	0
SRR6701627	CFSAN060489	feces	clinical-animal	1998	Salmonella enterica	enterica	Dublin	Dublin	>>>>>>>>>>>>	0	0	0	0	0	0	0	0	0	0	0	0	0	0	0	0	0	0	0	0	0	0	0	0	0	0	0	0	0	0	0	0	0	0	0	0	0	0	0	0
SRR6701628	CFSAN060430	Secretion	clinical-human	1988	Salmonella enterica	enterica	Dublin	Dublin	>>>>>>>>>>>>	0	0	0	0	0	0	0	0	0	0	0	0	0	0	0	0	0	0	0	0	0	0	0	0	0	0	0	0	0	0	0	0	0	0	0	0	0	0	0	0
SRR6701630	CFSAN060446	Liver Fluid	clinical-human	1991	Salmonella enterica	enterica	Dublin	Dublin	>>>>>>>>>>>>	0	0	0	0	0	0	0	0	0	0	0	0	0	0	0	0	0	0	0	0	0	0	0	0	0	0	0	0	0	0	0	0	0	0	0	0	0	0	0	0
SRR6701632	CFSAN060447	blood	clinical-human	1991	Salmonella enterica	enterica	Dublin	Dublin	>>>>>>>>>>>>	0	0	0	0	0	0	0	0	0	0	0	0	0	0	0	0	0	0	0	0	0	0	0	0	0	0	0	0	0	0	0	0	0	0	0	0	0	0	0	0
SRR6701657	CFSAN060428	Liquor	clinical-human	1987	Salmonella enterica	enterica	Dublin	Dublin	>>>>>>>>>>>>	0	0	0	0	0	0	0	0	0	0	0	0	0	0	0	0	0	0	0	0	0	0	0	0	0	0	0	0	0	0	0	0	0	0	0	0	0	0	0	0
SRR6701658	CFSAN060429	blood	clinical-human	1987	Salmonella enterica	enterica	Dublin	Dublin	>>>>>>>>>>>>	0	0	0	0	0	0	0	0	0	0	0	0	0	0	0	0	0	0	0	0	0	0	0	0	0	0	0	0	0	0	0	0	0	0	0	0	0	0	0	0
SRR6701659	CFSAN060451	blood	clinical-human	1991	Salmonella enterica	enterica	Dublin	Dublin	>>>>>>>>>>>>	0	0	0	0	0	0	0	0	0	0	0	0	0	0	0	0	0	0	0	0	0	0	0	0	0	0	0	0	0	0	0	0	0	0	0	0	0	0	0	0
SRR6701660	CFSAN060451	blood	clinical-human	1991	Salmonella enterica	enterica	Dublin	Dublin	>>>>>>>>>>>>	0	0	0	0	0	0	0	0	0	0	0	0	0	0	0	0	0	0	0	0	0	0	0	0	0	0	0	0	0	0	0	0	0	0	0	0	0	0	0	0
SRR6701661	CFSAN060513	blood	clinical-human	2005	Salmonella enterica	enterica	Dublin	Dublin	>>>>>>>>>>>>	0	0	0	0	0	0	0	0	0	0	0	0	0	0	0	0	0	0	0	0	0	0	0	0	0	0	0	0	0	0	0	0	0	0	0	0	0	0	0	0
SRR6701665	CFSAN060450	Ascitic Fluid	clinical-human	1991	Salmonella enterica	enterica	Dublin	Dublin	>>>>>>>>>>>>	0	0	0	0	0	0	0	0	0	0	0	0	0	0	0	0	0	0	0	0	0	0	0	0	0	0	0	0	0	0	0	0	0	0	0	0	0	0	0	0
SRR6701666	CFSAN060434	feces	clinical-human	1989	Salmonella enterica	enterica	Dublin	Dublin	>>>>>>>>>>>>	0	0	0	0	0	0	0	0	0	0	0	0	0	0	0	0	0	0	0	0	0	0	0	0	0	0	0	0	0	0	0	0	0	0	0	0	0	0	0	0
SRR6701668	CFSAN060495	biological fluid or tissue	clinical-animal	1999	Salmonella enterica	enterica	Dublin	Dublin	>>>>>>>>>>>>	0	0	0	0	0	0	0	0	0	0	0	0	0	0	0	0	0	0	0	0	0	0	0	0	0	0	0	0	0	0	0	0	0	0	0	0	0	0	0	0
SRR6701669	CFSAN060496	biological fluid or tissue	clinical-animal	1999	Salmonella enterica	enterica	Dublin	Dublin	>>>>>>>>>>>>	0	0	0	0	0	0	0	0	0	0	0	0	0	0	0	0	0	0	0	0	0	0	0	0	0	0	0	0	0	0	0	0	0	0	0	0	0	0	0	0
SRR6701670	CFSAN060529	Spinal Cord	clinical-animal	2015	Salmonella enterica	enterica	Dublin	Dublin	>>>>>>>>>>>>	0	0	0	0	0	0	0	0	0	0	0	0	0	0	0	0	0	0	0	0	0	0	0	0	0	0	0	0	0	0	0	0	0	0	0	0	0	0	0	0
SRR6701672	CFSAN060497	missing	clinical-human	1999	Salmonella enterica	enterica	Dublin	Dublin	>>>>>>>>>>>>	0	0	0	0	0	0	0	0	0	0	0	0	0	0	0	0	0	0	0	0	0	0	0	0	0	0	0	0	0	0	0	0	0	0	0	0	0	0	0	0
SRR6701673	CFSAN060515	biological fluid or tissue	clinical-animal	2005	Salmonella enterica	enterica	Dublin	Dublin	>>>>>>>>>>>>	0	0	0	0	0	0	0	0	0	0	0	0	0	0	0	0	0	0	0	0	0	0	0	0	0	0	0	0	0	0	0	0	0	0	0	0	0	0	0	0
SRR6701676	CFSAN060514	Peripheral Blood	clinical-human	2005	Salmonella enterica	enterica	Dublin	Dublin	>>>>>>>>>>>>	0	0	0	0	0	0	0	0	0	0	0	0	0	0	0	0	0	0	0	0	0	0	0	0	0	0	0	0	0	0	0	0	0	0	0	0	0	0	0	0
SRR6701677	CFSAN060478	blood	clinical-human	1998	Salmonella enterica	enterica	Dublin	Dublin	>>>>>>>>>>>>	0	0	0	0	0	0	0	0	0	0	0	0	0	0	0	0	0	0	0	0	0	0	0	0	0	0	0	0	0	0	0	0	0	0	0	0	0	0	0	0
SRR6701679	CFSAN060477	blood	clinical-human	1998	Salmonella enterica	enterica	Dublin	Dublin	>>>>>>>>>>>>	0	0	0	0	0	0	0	0	0	0	0	0	0	0	0	0	0	0	0	0	0	0	0	0	0	0	0	0	0	0	0	0	0	0	0	0	0	0	0	0
SRR6701680	CFSAN060479	blood	clinical-human	1998	Salmonella enterica	enterica	Dublin	Dublin	>>>>>>>>>>>>	0	0	0	0	0	0	0	0	0	0	0	0	0	0	0	0	0	0	0	0	0	0	0	0	0	0	0	0	0	0	0	0	0	0	0	0	0	0	0	0
SRR6701681	CFSAN060479	blood	clinical-human	1998	Salmonella enterica	enterica	Dublin	Dublin	>>>>>>>>>>>>	0	0	0	0	0	0	0	0	0	0	0	0	0	0	0	0	0	0	0	0	0	0	0	0	0	0	0	0	0	0	0	0	0	0	0	0	0	0	0	0
SRR6701692	CFSAN060466	feces	clinical-animal	1996	Salmonella enterica	enterica	Dublin	Dublin	>>>>>>>>>>>>	0	0	0	0	0	0	0	0	0	0	0	0	0	0	0	0	0	0	0	0	0	0	0	0	0	0	0	0	0	0	0	0	0	0	0	0	0	0	0	0
SRR6701693	CFSAN060532	blood	clinical-human	2015	Salmonella enterica	enterica	Dublin	Dublin	>>>>>>>>>>>>	0	0	0	0	0	0	0	0	0	0	0	0	0	0	0	0	0	0	0	0	0	0	0	0	0	0	0	0	0	0	0	0	0	0	0	0	0	0	0	0
SRR6701782	CFSAN060530	biological fluid or tissue	clinical-animal	2015	Salmonella enterica	enterica	Dublin	Dublin	>>>>>>>>>>>>	0	0	0	0	0	0	0	0	0	0	0	0	0	0	0	0	0	0	0	0	0	0	0	0	0	0	0	0	0	0	0	0	0	0	0	0	0	0	0	0
SRR6701792	CFSAN060526	Punch Liquid	clinical-human	2014	Salmonella enterica	enterica	Dublin	Dublin	>>>>>>>>>>>>	0	0	0	0	0	0	0	0	0	0	0	0	0	0	0	0	0	0	0	0	0	0	0	0	0	0	0	0	0	0	0	0	0	0	0	0	0	0	0	0
SRR6701894	CFSAN060482	blood	clinical-human	1998	Salmonella enterica	enterica	Dublin	Dublin	>>>>>>>>>>>>	0	0	0	0	0	0	0	0	0	0	0	0	0	0	0	0	0	0	0	0	0	0	0	0	0	0	0	0	0	0	0	0	0	0	0	0	0	0	0	0
SRR6701911	CFSAN060522	blood	clinical-human	2013	Salmonella enterica	enterica	Dublin	Dublin	>>>>>>>>>>>>	0	0	0	0	0	0	0	0	0	0	0	0	0	0	0	0	0	0	0	0	0	0	0	0	0	0	0	0	0	0	0	0	0	0	0	0	0	0	0	0
SRR6701922	CFSAN060527	Punch Liquid	clinical-human	2014	Salmonella enterica	enterica	Dublin	Dublin	>>>>>>>>>>>>	0	0	0	0	0	0	0	0	0	0	0	0	0	0	0	0	0	0	0	0	0	0	0	0	0	0	0	0	0	0	0	0	0	0	0	0	0	0	0	0
SRR6701923	CFSAN060528	blood	clinical-human	2014	Salmonella enterica	enterica	Dublin	Dublin	>>>>>>>>>>>>	0	0	0	0	0	0	0	0	0	0	0	0	0	0	0	0	0	0	0	0	0	0	0	0	0	0	0	0	0	0	0	0	0	0	1	0	0	0	0	0
SRR6702193	CFSAN060483	blood	clinical-human	1998	Salmonella enterica	enterica	Dublin	Dublin	>>>>>>>>>>>>	0	0	0	0	0	0	0	0	0	0	0	0	0	0	0	0	0	0	0	0	0	0	0	0	0	0	0	0	0	0	0	0	0	0	0	0	0	0	0	0
SRR6702195	CFSAN060464	sputum	clinical-human	1995	Salmonella enterica	enterica	Dublin	Dublin	>>>>>>>>>>>>	0	0	0	0	0	0	0	0	0	0	0	0	0	0	0	0	0	0	0	0	0	0	0	0	0	0	0	0	0	0	0	0	0	0	0	0	0	0	0	0
SRR6702214	CFSAN060476	feces	clinical-human	1997	Salmonella enterica	enterica	Dublin	Dublin	>>>>>>>>>>>>	0	0	0	0	0	0	0	0	0	0	0	0	0	0	0	0	0	0	0	0	0	0	0	0	0	0	0	0	0	0	0	0	0	0	0	0	0	0	0	0
SRR6786594	NC_SE03	broiler chicken	animal-based food	2016	Salmonella enterica	enterica	Enteritidis	Enteritidis	>>>>>>>>>>>>	0	0	0	0	0	0	0	0	0	0	0	0	0	0	0	0	0	0	0	0	0	0	0	0	0	0	0	0	0	0	0	0	0	0	0	0	0	0	0	0
SRR6786708	NC_Sty3	carcass	animal-based food	2000	Salmonella enterica	enterica	Typhimurium	Typhimurium	>>>>>>>>>>>>	0	0	0	0	0	0	0	0	0	0	0	0	0	0	0	0	0	0	0	0	0	0	0	0	0	0	0	0	0	0	0	0	0	0	0	0	0	0	0	0
SRR6787007	NC_Sty02	broiler chicken	animal-based food	2015	Salmonella enterica	enterica	Typhimurium	Minnesota	>>>>>>>>>>>>	0	0	0	0	0	0	0	0	0	0	0	0	0	0	0	0	0	0	0	0	0	0	0	0	0	0	0	0	0	0	0	0	0	0	0	0	0	0	0	0
SRR6787009	NC_Sty1	Slaughterhouse	environment	2000	Salmonella enterica	enterica	Typhimurium	Typhimurium	>>>>>>>>>>>>	0	0	0	0	0	0	0	0	0	0	0	0	0	0	0	0	0	0	0	0	0	0	0	0	0	0	0	0	0	0	0	0	0	0	0	0	0	0	0	0
SRR6787010	NC_STy03	broiler chicken	animal-based food	2015	Salmonella enterica	enterica	Typhimurium	Typhimurium	>>>>>>>>>>>>	0	1	0	0	0	0	1	1	0	1	1	0	0	0	1	0	0	0	0	0	0	0	0	0	0	0	0	0	0	0	0	0	0	0	0	1	0	0	0	0
SRR6787040	NC_STy07	broiler chicken	animal-based food	2015	Salmonella enterica	enterica	Typhimurium	Typhimurium	>>>>>>>>>>>>	1	0	0	0	0	0	0	1	0	0	1	0	0	1	0	0	0	0	1	0	0	0	0	0	0	0	0	0	0	0	0	0	0	0	0	1	0	0	0	0
SRR6787042	NC_SE09	broiler chicken	animal-based food	2016	Salmonella enterica	enterica	Enteritidis	Enteritidis	>>>>>>>>>>>>	0	0	0	0	0	0	0	0	0	0	0	0	0	0	0	0	0	0	0	0	0	0	0	0	0	0	0	0	0	0	0	0	0	0	0	0	0	0	0	0
SRR6787044	NC_SI020	broiler chicken	animal-based food	2016	Salmonella enterica	enterica	Infantis	Infantis	>>>>>>>>>>>>	0	0	0	0	0	0	0	0	0	0	0	0	0	0	0	0	0	0	0	0	0	0	0	0	0	0	0	0	0	0	0	0	0	0	0	0	0	0	0	0
SRR6881650	NC_SI11	mechanically recovered meat	animal-based food	2013	Salmonella enterica	enterica	Infantis	Infantis	>>>>>>>>>>>>	0	0	0	0	0	0	0	0	0	0	0	0	0	0	0	0	0	0	0	0	0	0	0	0	0	0	0	0	0	0	0	0	0	0	0	0	0	0	0	0
SRR6881655	NC_SI6	chicken meat	animal-based food	2012	Salmonella enterica	enterica	Infantis	Typhimurium	>>>>>>>>>>>>	0	0	0	0	0	0	0	0	0	0	0	0	0	0	0	0	0	0	0	0	0	0	0	0	0	0	0	0	0	0	0	0	0	0	0	0	0	0	0	0
SRR6881656	NC_SI8	slaughterhouse	environment	2013	Salmonella enterica	enterica	Infantis	Infantis	>>>>>>>>>>>>	0	0	0	0	0	0	0	0	0	0	0	0	0	0	0	0	0	0	0	0	0	0	0	0	0	0	0	0	0	0	0	0	0	0	0	0	0	0	0	0
SRR6881659	NC_SI3	carcass	animal-based food	2012	Salmonella enterica	enterica	Infantis	Infantis	>>>>>>>>>>>>	0	0	0	0	0	0	0	0	0	0	0	0	0	0	0	0	0	0	0	0	0	0	0	0	0	0	0	0	0	0	0	0	0	0	0	0	0	0	0	0
SRR6881660	NC_SI7	slaughterhouse	environment	2013	Salmonella enterica	enterica	Infantis	Infantis	>>>>>>>>>>>>	0	0	0	0	0	0	0	0	0	0	0	0	0	0	0	0	0	0	0	0	0	0	0	0	0	0	0	0	0	0	0	0	0	0	0	0	0	0	0	0
SRR6881663	NC_STy8	chicken meat	animal-based food	2012	Salmonella enterica	enterica	Typhimurium	Typhimurium	>>>>>>>>>>>>	0	0	0	0	0	0	0	0	0	0	0	0	0	0	0	0	0	0	0	0	0	0	0	0	0	0	0	0	0	0	0	0	0	0	0	0	0	0	0	0
SRR6881664	NC_SI2	mechanically recovered meat	animal-based food	2012	Salmonella enterica	enterica	Infantis	Infantis	>>>>>>>>>>>>	0	0	0	0	0	0	0	0	0	0	0	0	0	0	0	0	0	0	0	0	0	0	0	0	0	0	0	0	0	0	0	0	0	0	0	0	0	0	0	0
SRR6881665	NC_STy10	Slaughterhouse	environment	2012	Salmonella enterica	enterica	Typhimurium	Typhimurium	>>>>>>>>>>>>	0	0	0	0	0	0	0	0	0	0	0	0	0	0	0	0	0	0	0	0	0	0	0	0	0	0	0	0	0	0	0	0	0	0	0	0	0	0	0	0
SRR6881666	NC_STy6	mechanically recovered meat	animal-based food	2012	Salmonella enterica	enterica	Typhimurium	Typhimurium	>>>>>>>>>>>>	0	0	0	0	0	0	0	0	0	0	0	0	0	0	0	0	0	0	0	0	0	0	0	0	0	0	0	0	0	0	0	0	0	0	0	0	0	0	0	0
SRR6881668	NC_STy5	Slaughterhouse	environment	2012	Salmonella enterica	enterica	Typhimurium	Typhimurium	>>>>>>>>>>>>	0	0	0	0	0	0	0	0	0	0	0	0	0	0	0	0	0	0	0	0	0	0	0	0	0	0	0	0	0	0	0	0	0	0	0	0	0	0	0	0
SRR6881669	NC_STy14	salted chicken breast	animal-based food	2013	Salmonella enterica	enterica	Typhimurium	Typhimurium	>>>>>>>>>>>>	0	0	0	0	0	0	0	1	0	0	1	0	0	1	0	0	0	0	0	0	0	0	0	0	0	0	0	0	0	0	0	0	0	0	1	0	0	0	0	0
SRR6881670	NC_STy12	Pig stomach	clinical-animal	2013	Salmonella enterica	enterica	Typhimurium	Typhimurium	>>>>>>>>>>>>	0	0	0	0	0	0	0	0	0	0	0	0	0	0	0	0	0	0	0	0	0	0	0	0	0	0	0	0	0	0	0	0	0	0	0	0	0	0	0	0
SRR6881702	NC_STy18	carcass	animal-based food	2014	Salmonella enterica	enterica	Typhimurium	Typhimurium	>>>>>>>>>>>>	0	0	0	0	0	0	0	0	0	0	0	0	0	0	0	0	0	0	0	0	0	0	0	0	0	0	0	0	0	0	0	0	0	0	0	0	0	0	0	0
SRR6881709	NC_SI10	viscera	animal-based food	2013	Salmonella enterica	enterica	Infantis	Ohio	>>>>>>>>>>>>	0	0	0	0	0	0	0	0	0	0	0	0	0	0	0	0	0	0	0	0	0	0	0	0	0	0	0	0	0	0	0	0	0	0	0	0	0	0	0	0
SRR6881710	NC_STy15	mechanically recovered meat	animal-based food	2014	Salmonella enterica	enterica	Typhimurium	Typhimurium	>>>>>>>>>>>>	0	0	0	0	0	0	0	0	0	0	0	0	0	0	0	0	0	0	0	0	0	0	0	0	0	0	0	0	0	0	0	0	0	0	0	0	0	0	0	0
SRR6881711	NC_SI016	broiler chicken	animal-based food	2015	Salmonella enterica	enterica	Infantis	Minnesota	>>>>>>>>>>>>	0	0	0	0	0	0	0	0	0	0	0	0	0	0	0	0	0	0	0	0	0	0	0	0	0	0	0	0	0	0	0	0	0	0	0	0	0	0	0	0
SRR6881714	NC_SH1	mechanically recovered meat	animal-based food	2016	Salmonella enterica	enterica	Heidelberg	Heidelberg	>>>>>>>>>>>>	0	0	0	0	0	0	0	0	0	0	0	0	0	0	0	0	0	0	0	0	0	0	0	0	0	1	0	0	0	0	0	0	0	0	0	0	0	0	0	0
SRR6881715	NC_STy16	mechanically recovered meat	animal-based food	2014	Salmonella enterica	enterica	Typhimurium	Typhimurium	>>>>>>>>>>>>	0	0	0	1	0	0	0	0	0	0	0	0	1	0	0	0	0	0	0	0	0	0	0	0	0	0	0	0	0	0	0	0	0	0	0	0	0	0	0	0
SRR6927006	NC_SE12	Chicken wing	animal-based food	2014	Salmonella enterica	enterica	Enteritidis	Enteritidis	>>>>>>>>>>>>	0	0	0	0	0	0	0	0	0	0	0	0	0	0	0	0	0	0	0	0	0	0	0	0	0	0	0	0	0	0	0	0	0	0	0	0	0	0	0	0
SRR6927008	NC_SE11	chicken breast	animal-based food	2014	Salmonella enterica	enterica	Enteritidis	Typhimurium	>>>>>>>>>>>>	0	0	0	0	0	0	0	0	0	0	0	0	0	0	0	0	0	0	0	0	0	0	0	0	0	0	0	0	0	0	0	0	0	0	0	0	0	0	0	0
SRR6927020	NC_SE7	heart	clinical-animal	2013	Salmonella enterica	enterica	Enteritidis	Typhimurium	>>>>>>>>>>>>	0	0	0	0	0	0	0	0	0	0	0	0	0	0	0	0	0	0	0	0	0	0	0	0	0	0	0	0	0	0	0	0	0	0	0	0	0	0	0	0
SRR6927022	ULBRA-SA054	Feces	clinical-animal	2014	Salmonella enterica	enterica	Enteritidis	Enteritidis	>>>>>>>>>>>>	0	0	0	0	0	0	0	0	0	0	0	0	0	0	0	0	0	0	0	0	0	0	0	0	0	0	0	0	0	0	0	0	0	0	0	0	0	0	0	0
SRR6927025	NC_SE8	Carcass	animal-based food	2013	Salmonella enterica	enterica	Enteritidis	Enteritidis	>>>>>>>>>>>>	0	0	0	0	0	0	0	0	0	0	0	0	0	0	0	0	0	0	0	0	0	0	0	0	0	0	0	0	0	0	0	0	0	0	0	0	0	0	0	0
SRR6927193	NC_SE4	Salted chicken breast	animal-based food	2012	Salmonella enterica	enterica	Enteritidis	Enteritidis	>>>>>>>>>>>>	0	0	0	0	0	0	0	0	0	0	0	0	0	0	0	0	0	0	0	0	0	0	0	0	0	0	0	0	0	0	0	0	0	0	0	0	0	0	0	0
SRR6927195	NC_SE13	Chicken wing	animal-based food	2014	Salmonella enterica	enterica	Enteritidis	Enteritidis	>>>>>>>>>>>>	0	0	0	0	0	0	0	0	0	0	0	0	0	0	0	0	0	0	0	0	0	0	0	0	0	0	0	0	0	0	0	0	0	0	0	0	0	0	0	0
SRR6927217	NC_SI15	chicken thigh	animal-based food	2014	Salmonella enterica	enterica	Infantis	Infantis	>>>>>>>>>>>>	0	0	0	0	0	0	0	0	0	0	0	0	0	0	0	0	0	0	0	0	0	0	0	0	0	0	0	0	0	0	0	0	0	0	0	0	0	0	0	0
SRR6927233	ULBRA-SA156	Pick Eggs (Breeders)	clinical-animal	2015	Salmonella enterica	enterica	Typhimurium	Typhimurium	>>>>>>>>>>>>	0	0	0	0	0	0	0	0	0	0	0	0	0	0	0	0	0	0	0	0	0	0	0	0	0	0	0	0	0	0	0	0	0	0	0	0	0	0	0	0
SRR6927242	ULBRA-SA060	Poultry Flock	animal-based food	2014	Salmonella enterica	enterica	Typhimurium	Typhimurium	>>>>>>>>>>>>	0	0	0	0	0	0	0	0	0	0	0	0	0	0	0	0	0	0	0	0	0	0	0	0	0	0	0	0	0	0	0	0	0	0	0	0	0	0	0	0
SRR6927270	NC_SI14	slaughterhouse	environment	2014	Salmonella enterica	enterica	Infantis	Infantis	>>>>>>>>>>>>	0	0	0	0	0	0	0	0	0	0	0	0	0	0	0	0	0	0	0	0	0	0	0	0	0	0	0	0	0	0	0	0	0	0	0	0	0	0	0	0
SRR6927276	ULBRA-SA005	Flock Environment (Breeders)	environment	2014	Salmonella enterica	enterica	Enteritidis	Enteritidis	>>>>>>>>>>>>	0	0	0	0	0	0	0	0	0	0	0	0	0	0	0	0	0	0	0	0	0	0	0	0	0	0	0	0	0	0	0	0	0	0	0	0	0	0	0	0
SRR6927292	ULBRA-SA090	Organ (Breeders)	clinical-animal	2014	Salmonella enterica	enterica	Gallinarum	Gallinarum	>>>>>>>>>>>>	0	0	0	0	0	0	0	0	0	0	0	0	0	0	0	0	0	0	0	0	0	0	0	0	0	0	0	0	0	0	0	0	0	0	0	0	0	0	0	0
SRR6927294	NC_SI16	chicken breast in natura	animal-based food	2014	Salmonella enterica	enterica	Infantis	Infantis	>>>>>>>>>>>>	0	0	0	0	0	0	0	0	0	0	0	0	0	0	0	0	0	0	0	0	0	0	0	0	0	0	0	0	0	0	0	0	0	0	0	0	0	0	0	0
SRR6927301	NC_SI25	mechanically recovered meat	animal-based food	2014	Salmonella enterica	enterica	Infantis	Panama	>>>>>>>>>>>>	0	0	0	0	0	0	0	0	0	0	0	0	0	0	0	0	0	0	0	0	0	0	0	0	0	0	0	0	0	0	0	0	0	0	0	0	0	0	0	0
SRR6927730	NC_SI27	chicken meat	animal-based food	2014	Salmonella enterica	enterica	Infantis	Infantis	>>>>>>>>>>>>	0	0	0	0	0	0	0	0	0	0	0	0	0	0	0	0	0	0	0	0	0	0	0	0	0	0	0	0	0	0	0	0	0	0	0	0	0	0	0	0
SRR6967807	NC_SE18	Salted chicken breast	animal-based food	2014	Salmonella enterica	enterica	Enteritidis	Enteritidis	>>>>>>>>>>>>	0	0	0	0	0	0	0	0	0	0	0	0	0	0	0	0	0	0	0	0	0	0	0	0	0	0	0	0	0	0	0	0	0	0	0	0	0	0	0	0
SRR6967887	NC_STy13	Pork	animal-based food	2013	Salmonella enterica	enterica	Typhimurium	Typhimurium	>>>>>>>>>>>>	1	0	0	0	0	0	0	0	0	0	0	0	1	0	0	0	0	0	1	0	0	0	0	0	0	0	0	0	0	0	0	0	0	0	1	0	0	0	0	0
SRR6967898	NC_SSc142	chicken carcass	animal-based food	2016	Salmonella enterica	enterica	Schwarzengrund	Newport	>>>>>>>>>>>>	0	0	0	1	0	0	0	0	0	0	0	0	1	0	0	0	0	0	0	0	0	0	0	0	0	0	0	0	0	0	1	0	0	0	0	0	0	0	0	0
SRR6968009	NC_STy08	broiler chicken	animal-based food	2015	Salmonella enterica	enterica	Typhimurium	Typhimurium	>>>>>>>>>>>>	1	0	0	0	0	0	0	0	0	0	0	0	0	1	0	0	0	0	1	0	0	0	0	0	0	0	0	0	0	0	0	0	0	0	1	0	0	0	0	0
SRR6968018	NC_SSc150	chicken carcass	animal-based food	2016	Salmonella enterica	enterica	Schwarzengrund	Schwarzengrund	>>>>>>>>>>>>	0	0	1	0	0	1	0	0	1	0	1	0	0	1	0	0	0	0	0	0	0	0	0	0	0	0	0	0	0	0	0	0	1	0	0	0	0	0	0	0
SRR6968020	NC_SSc146	chicken carcass	animal-based food	2016	Salmonella enterica	enterica	Schwarzengrund	Schwarzengrund	>>>>>>>>>>>>	0	0	0	0	0	0	0	0	0	0	0	0	0	0	0	0	0	0	0	0	0	0	0	0	0	0	0	0	0	0	0	0	0	0	0	0	0	0	0	0
SRR6968213	NC_SSc140	chicken Wing Paddle	animal-based food	2016	Salmonella enterica	enterica	Schwarzengrund	Schwarzengrund	>>>>>>>>>>>>	0	0	0	0	0	0	0	0	0	0	0	0	0	0	0	0	0	0	0	0	0	0	0	0	0	0	0	0	0	0	0	0	0	0	0	0	0	0	0	0
SRR6973025	NC_SSc149	chicken carcass	animal-based food	2016	Salmonella enterica	enterica	Schwarzengrund	Schwarzengrund	>>>>>>>>>>>>	0	0	0	0	0	1	0	1	1	0	1	0	0	0	0	0	0	0	1	0	0	0	0	0	0	0	0	0	0	0	0	0	0	0	0	0	0	0	0	0
SRR6973630	NC_SSc130	chicken cage after cleaning	environment	2016	Salmonella enterica	enterica	Schwarzengrund	Schwarzengrund	>>>>>>>>>>>>	0	0	0	0	0	0	0	0	0	0	1	0	0	0	0	0	0	0	0	0	0	0	0	0	0	0	0	0	0	0	0	0	0	0	0	0	0	0	0	0
SRR6973642	NC_SE14	Chiken skin	animal-based food	2014	Salmonella enterica	enterica	Enteritidis	Enteritidis	>>>>>>>>>>>>	0	0	0	0	0	0	0	0	0	0	0	0	0	0	0	0	0	0	0	0	0	0	0	0	0	0	0	0	0	0	0	0	0	0	0	0	0	0	0	0
SRR6973701	NC_SSc136	chicken Wing Paddle	animal-based food	2016	Salmonella enterica	enterica	Schwarzengrund	Heidelberg	>>>>>>>>>>>>	0	0	0	0	0	0	0	0	0	0	0	0	0	0	0	0	0	0	0	0	0	0	0	0	0	0	0	0	1	0	0	0	0	0	0	0	0	0	0	0
SRR6973761	NC_SSc126	chicken thigh	animal-based food	2016	Salmonella enterica	enterica	Schwarzengrund	Schwarzengrund	>>>>>>>>>>>>	0	0	1	0	0	0	0	1	1	0	1	0	0	1	0	0	0	0	1	0	0	0	0	0	0	0	0	0	0	0	0	0	0	0	0	0	0	0	0	0
SRR6973763	NC_SE15	Chiken breast	animal-based food	2014	Salmonella enterica	enterica	Enteritidis	Enteritidis	>>>>>>>>>>>>	0	0	0	0	0	0	0	0	0	0	0	0	0	0	0	0	0	0	0	0	0	0	0	0	0	0	0	0	0	0	0	0	0	0	0	0	0	0	0	0
SRR6973781	NC_SSc123	mechanically recovered meat	animal-based food	2016	Salmonella enterica	enterica	Schwarzengrund	Schwarzengrund	>>>>>>>>>>>>	0	0	1	0	0	0	0	1	1	0	1	0	0	1	0	0	0	0	1	0	0	0	0	0	0	0	0	0	0	0	0	0	1	0	0	0	0	0	0	0
SRR6973782	NC_SE16	mechanically recovered meat	animal-based food	2014	Salmonella enterica	enterica	Enteritidis	Enteritidis	>>>>>>>>>>>>	0	0	0	0	0	0	0	0	0	0	0	0	0	0	0	0	0	0	0	0	0	0	0	0	0	0	0	0	0	0	0	0	0	0	0	0	0	0	0	0
SRR6973784	NC_SSc119	mechanically recovered meat	animal-based food	2016	Salmonella enterica	enterica	Schwarzengrund	Schwarzengrund	>>>>>>>>>>>>	0	0	1	0	0	0	0	1	1	0	1	0	0	1	0	0	0	0	0	0	0	0	0	0	0	0	0	0	0	0	0	0	0	0	0	0	0	0	0	0
SRR7013012	CFSAN060531	biological fluid or tissue	clinical-animal	2015	Salmonella enterica	enterica	Dublin	Enteritidis	>>>>>>>>>>>>	0	0	0	0	0	0	0	0	0	0	0	0	0	0	0	0	0	0	0	0	0	0	0	0	0	0	0	0	0	0	0	0	0	0	0	0	0	0	0	0
SRR7013016	CFSAN060533	urine	clinical-human	2016	Salmonella enterica	enterica	Dublin	Dublin	>>>>>>>>>>>>	0	0	0	0	0	0	0	0	0	0	0	0	0	0	0	0	0	0	0	0	0	0	0	0	0	0	0	0	0	0	0	0	0	0	0	0	0	0	0	0
SRR7013017	CFSAN060463	blood	clinical-human	1994	Salmonella enterica	enterica	Dublin	Dublin	>>>>>>>>>>>>	0	0	0	0	0	0	0	0	0	0	0	0	0	0	0	0	0	0	0	0	0	0	0	0	0	0	0	0	0	0	0	0	0	0	0	0	0	0	0	0
SRR7013018	CFSAN060457	Secretion	clinical-human	1992	Salmonella enterica	enterica	Dublin	Dublin	>>>>>>>>>>>>	0	0	0	0	0	0	0	0	0	0	0	0	0	0	0	0	0	0	0	0	0	0	0	0	0	0	0	0	0	0	0	0	0	0	0	0	0	0	0	0
SRR7013019	CFSAN060461	blood	clinical-human	1994	Salmonella enterica	enterica	Dublin	Dublin	>>>>>>>>>>>>	0	0	0	0	0	0	0	0	0	0	0	0	0	0	0	0	0	0	0	0	0	0	0	0	0	0	0	0	0	0	0	0	0	0	1	0	0	0	0	0
SRR7013029	CFSAN060467	biological fluid or tissue	clinical-animal	1997	Salmonella enterica	enterica	Dublin	Dublin	>>>>>>>>>>>>	0	0	0	0	0	0	0	0	0	0	0	0	0	0	0	0	0	0	0	0	0	0	0	0	0	0	0	0	0	0	0	0	0	0	0	0	0	0	0	0
SRR7013038	CFSAN060458	urine	clinical-human	1993	Salmonella enterica	enterica	Dublin	Dublin	>>>>>>>>>>>>	0	0	0	0	0	0	0	0	0	0	0	0	0	0	0	0	0	0	0	0	0	0	0	0	0	0	0	0	0	0	0	0	0	0	0	0	0	0	0	0
SRR7013780	CFSAN060523	blood	clinical-human	2013	Salmonella enterica	enterica	Dublin	Dublin	>>>>>>>>>>>>	0	0	0	0	0	0	0	0	0	0	0	0	0	0	0	0	0	0	0	0	0	0	0	0	0	0	0	0	0	0	0	0	0	0	0	0	0	0	0	0
SRR7013834	CFSAN060511	blood	clinical-human	2005	Salmonella enterica	enterica	Dublin	Enteritidis	>>>>>>>>>>>>	0	0	0	0	0	0	0	0	0	0	0	0	0	0	0	0	0	0	0	0	0	0	0	0	0	0	0	0	0	0	0	0	0	0	0	0	0	0	0	0
SRR7013835	CFSAN060462	blood	clinical-human	1994	Salmonella enterica	enterica	Dublin	Dublin	>>>>>>>>>>>>	0	0	0	0	0	0	0	0	0	0	0	0	0	0	0	0	0	0	0	0	0	0	0	0	0	0	0	0	0	0	0	0	0	0	0	0	0	0	0	0
SRR7013856	CFSAN060506	blood	clinical-human	2004	Salmonella enterica	enterica	Dublin	Dublin	>>>>>>>>>>>>	0	0	0	0	0	0	0	0	0	0	0	0	0	0	0	0	0	0	0	0	0	0	0	0	0	0	0	0	0	0	0	0	0	0	0	0	0	0	0	0
SRR7013857	CFSAN060509	missing	clinical-human	2004	Salmonella enterica	enterica	Dublin	Dublin	>>>>>>>>>>>>	0	0	0	0	0	0	0	0	0	0	0	0	0	0	0	0	0	0	0	0	0	0	0	0	0	0	0	0	0	0	0	0	0	0	0	0	0	0	0	0
SRR7013930	CFSAN060510	missing	clinical-human	2005	Salmonella enterica	enterica	Dublin	Dublin	>>>>>>>>>>>>	0	0	0	0	0	0	0	0	0	0	0	0	0	0	0	0	0	0	0	0	0	0	0	0	0	0	0	0	0	0	0	0	0	0	0	0	0	0	0	0
SRR7014209	CFSAN060524	blood	clinical-human	2013	Salmonella enterica	enterica	Dublin	Dublin	>>>>>>>>>>>>	0	0	0	0	0	0	0	0	0	0	0	0	0	0	0	0	0	0	0	0	0	0	0	0	0	0	0	0	0	0	0	0	0	0	0	0	0	0	0	0
SRR7014222	CFSAN060508	blood	clinical-human	2004	Salmonella enterica	enterica	Dublin	Dublin	>>>>>>>>>>>>	0	0	0	0	0	0	0	0	0	0	0	0	0	0	0	0	0	0	0	0	0	0	0	0	0	0	0	0	0	0	0	0	0	0	0	0	0	0	0	0
SRR7014225	CFSAN060507	blood	clinical-human	2004	Salmonella enterica	enterica	Dublin	Dublin	>>>>>>>>>>>>	0	0	0	0	0	0	0	0	0	0	0	0	0	0	0	0	0	0	0	0	0	0	0	0	0	0	0	0	0	0	0	0	0	0	0	0	0	0	0	0
SRR7014226	CFSAN060516	urine	clinical-human	2007	Salmonella enterica	enterica	Dublin	Dublin	>>>>>>>>>>>>	0	0	0	0	0	0	0	0	0	0	0	0	0	0	0	0	0	0	0	0	0	0	0	0	0	0	0	0	0	0	0	0	0	0	0	0	0	0	0	0
SRR7014227	CFSAN060516	urine	clinical-human	2007	Salmonella enterica	enterica	Dublin	Dublin	>>>>>>>>>>>>	0	0	0	0	0	0	0	0	0	0	0	0	0	0	0	0	0	0	0	0	0	0	0	0	0	0	0	0	0	0	0	0	0	0	0	0	0	0	0	0
SRR7014234	CFSAN060525	blood	clinical-human	2014	Salmonella enterica	enterica	Dublin	Dublin	>>>>>>>>>>>>	0	0	0	0	0	0	0	0	0	0	0	0	0	0	0	0	0	0	0	0	0	0	0	0	0	0	0	0	0	0	0	0	0	0	0	0	0	0	0	0
SRR7014235	CFSAN060512	Hip Secretion	clinical-human	2005	Salmonella enterica	enterica	Dublin	Dublin	>>>>>>>>>>>>	0	0	0	0	0	0	0	0	0	0	0	0	1	0	0	0	0	0	0	0	0	0	0	0	0	0	0	0	0	0	0	0	0	0	1	0	0	0	0	0
SRR7014277	CFSAN060490	blood	clinical-human	1998	Salmonella enterica	enterica	Dublin	Dublin	>>>>>>>>>>>>	0	0	0	0	0	0	0	0	0	0	0	0	0	0	0	0	0	0	0	0	0	0	0	0	0	0	0	0	0	0	0	0	0	0	0	0	0	0	0	0
SRR7014278	CFSAN060499	Rectal Swab	clinical-animal	2003	Salmonella enterica	enterica	Dublin	Dublin	>>>>>>>>>>>>	0	0	0	0	0	0	0	0	0	0	0	0	0	0	0	0	0	0	0	0	0	0	0	0	0	0	0	0	0	0	0	0	0	0	0	0	0	0	0	0
SRR7014279	CFSAN060498	feces	clinical-animal	2003	Salmonella enterica	enterica	Dublin	Dublin	>>>>>>>>>>>>	0	0	0	0	0	0	0	0	0	0	0	0	0	0	0	0	0	0	0	0	0	0	0	0	0	0	0	0	0	0	0	0	0	0	0	0	0	0	0	0
SRR7064457	NC_SMi160	Chiken feet	animal-based food	2016	Salmonella enterica	enterica	Minnesota	Abony	>>>>>>>>>>>>	0	0	0	0	0	0	0	0	0	0	0	0	0	0	0	0	0	0	0	0	0	0	0	0	0	0	0	0	0	0	0	0	0	0	0	0	0	0	0	0
SRR7064459	NC_SF	Chicken liver	animal-based food	2016	Salmonella enterica	enterica	Heidelberg	Heidelberg	>>>>>>>>>>>>	0	0	0	0	0	0	0	0	0	0	0	0	0	0	0	0	0	0	0	0	0	0	0	0	0	0	0	0	0	0	0	0	0	0	0	0	0	0	0	0
SRR7064463	NC_SOu718	chicken carcass	animal-based food	2016	Salmonella enterica	enterica	Ouakam	Abony	>>>>>>>>>>>>	0	0	0	0	0	0	0	0	0	0	0	0	0	0	0	0	0	0	0	0	0	0	0	0	0	0	0	0	0	0	0	0	0	0	0	0	0	0	0	0
SRR7064466	NC_SOr259	chicken carcass	animal-based food	2016	Salmonella enterica	enterica	Orion	Abony	>>>>>>>>>>>>	0	0	0	0	0	0	0	0	0	0	0	0	0	0	0	0	0	0	0	0	0	0	0	0	0	0	0	0	0	0	0	0	0	0	0	0	0	0	0	0
SRR7064608	NC_SMi295	mechanically recovered meat	animal-based food	2016	Salmonella enterica	enterica	Minnesota	Typhimurium	>>>>>>>>>>>>	0	1	0	0	0	0	1	1	0	0	1	0	0	0	0	0	0	0	0	0	0	0	0	0	0	0	0	0	0	0	0	0	0	0	0	0	0	0	0	0
SRR7064609	NC_SMi294	mechanically recovered meat	animal-based food	2016	Salmonella enterica	enterica	Minnesota	Typhimurium	>>>>>>>>>>>>	0	1	0	0	0	0	0	1	0	0	1	0	0	0	0	0	0	0	0	0	0	0	0	0	0	0	0	0	0	0	0	0	0	0	0	1	0	0	0	0
SRR7064618	NC_SP263	Swine tongue	animal-based food	2016	Salmonella enterica	enterica	Panama	Typhimurium	>>>>>>>>>>>>	0	0	0	0	0	0	1	1	0	0	1	0	0	0	0	0	0	0	0	0	0	0	0	0	0	0	0	0	0	0	0	0	0	0	1	0	0	0	0	0
SRR7064627	NC_SH120	Chicken thigh and drumstick	animal-based food	2016	Salmonella enterica	enterica	Heidelberg	Heidelberg	>>>>>>>>>>>>	0	0	0	0	0	0	0	0	0	0	0	0	0	0	0	0	0	0	0	0	0	0	0	0	0	1	0	0	0	0	0	0	0	0	0	0	0	0	0	0
SRR7064866	NC_SMi416	slaughterhouse	environment	2016	Salmonella enterica	enterica	Minnesota	Typhimurium	>>>>>>>>>>>>	0	0	0	0	0	0	0	1	0	0	0	0	0	0	0	0	0	0	0	0	0	0	0	0	0	0	0	0	0	0	0	0	0	0	0	0	0	0	0	0
SRR7064868	NC_SH118	chicken breast	animal-based food	2016	Salmonella enterica	enterica	Heidelberg	Heidelberg	>>>>>>>>>>>>	0	0	0	0	0	0	0	0	0	0	0	0	0	0	0	0	0	0	0	0	0	0	0	0	0	1	0	0	0	0	0	0	0	0	0	0	0	0	0	0
SRR7064912	NC_SOH813	feather meal	animal-based food	2016	Salmonella enterica	enterica	Ohio	Abony	>>>>>>>>>>>>	0	0	0	0	0	0	0	0	0	0	0	0	0	0	0	0	0	0	0	0	0	0	0	0	0	0	0	0	0	0	0	0	0	0	0	0	0	0	0	0
SRR7064945	NC_SF3	chicken meat	animal-based food	2016	Salmonella enterica	enterica	Heidelberg	Heidelberg	>>>>>>>>>>>>	0	0	0	0	0	0	0	0	0	0	0	0	0	0	0	0	0	0	0	0	0	0	0	0	0	0	0	0	0	0	0	0	0	0	0	0	0	0	0	0
SRR7064960	NC_SH10190712	broiler chicken	animal-based food	2016	Salmonella enterica	enterica	Heidelberg	Heidelberg	>>>>>>>>>>>>	0	0	0	0	0	0	0	0	0	0	0	0	0	0	0	0	0	0	0	0	0	0	0	0	0	0	0	0	0	1	0	0	0	0	0	0	0	0	0	0
SRR7064962	NC_SOH293	viscera	animal-based food	2016	Salmonella enterica	enterica	Ohio	Grumpensis	>>>>>>>>>>>>	0	0	0	0	0	0	0	0	0	0	0	0	0	0	0	0	0	0	0	0	0	0	0	0	0	0	0	0	0	0	0	0	0	0	0	0	0	0	0	0
SRR7064964	NC_SH121	chicken fillet sassami	animal-based food	2016	Salmonella enterica	enterica	Heidelberg	Heidelberg	>>>>>>>>>>>>	0	0	0	0	0	0	0	0	0	0	0	0	0	0	0	0	0	0	0	0	0	0	0	0	0	0	0	0	0	0	0	0	0	0	0	0	0	0	0	0
SRR7065001	NC_SH10206799	broiler chicken	animal-based food	2016	Salmonella enterica	enterica	Heidelberg	Heidelberg	>>>>>>>>>>>>	0	0	0	0	0	0	0	0	0	0	0	0	0	0	0	0	0	0	0	0	0	0	0	0	0	0	0	0	0	0	0	0	0	0	0	0	0	0	0	0
SRR7065005	NC_SH10201911	broiler chicken	animal-based food	2016	Salmonella enterica	enterica	Heidelberg	Heidelberg	>>>>>>>>>>>>	0	0	0	0	0	0	0	0	0	0	0	0	0	0	0	0	0	0	0	0	0	0	0	0	0	0	0	0	0	0	0	0	0	0	0	0	0	0	0	0
SRR7066577	ULBRA-SA286	Culture (Gallus gallus)	clinical-animal	2018	Salmonella enterica	enterica	Minnesota	I 1,4,[5],12:d:-	>>>>>>>>>>>>	0	0	0	0	0	0	0	0	0	0	0	0	0	0	0	0	0	0	0	0	0	0	0	0	0	0	0	0	0	0	0	0	0	0	0	0	0	0	0	0
SRR7066581	ULBRA-SA287	Culture (Gallus gallus)	clinical-animal	2018	Salmonella enterica	enterica	Minnesota	Typhimurium	>>>>>>>>>>>>	0	0	0	0	0	0	1	0	0	0	1	0	0	0	0	0	0	0	0	0	0	0	0	0	0	0	0	0	0	0	0	0	0	0	0	1	0	0	0	0
SRR7071937	NC_SH133	mechanically recovered meat	animal-based food	2016	Salmonella enterica	enterica	Heidelberg	Minnesota	>>>>>>>>>>>>	0	0	0	0	0	0	0	0	0	0	0	0	0	0	0	0	0	1	0	0	0	0	0	0	0	0	0	0	0	0	0	0	0	0	0	0	0	0	0	0
SRR7071939	NC_SH131	mechanically recovered meat	animal-based food	2016	Salmonella enterica	enterica	Heidelberg	Heidelberg	>>>>>>>>>>>>	0	0	0	0	0	0	0	0	0	0	0	0	0	0	0	0	0	0	0	0	0	0	0	0	0	0	0	0	0	0	0	0	0	0	0	0	0	0	0	0
SRR7071959	NC_SH258	chicken carcass	animal-based food	2016	Salmonella enterica	enterica	Heidelberg	Heidelberg	>>>>>>>>>>>>	0	0	0	0	0	0	0	0	0	0	0	0	0	0	0	0	0	0	0	0	0	0	0	0	0	0	0	0	1	0	0	0	0	0	0	0	0	0	0	0
SRR7071960	NC_SH138	leg quarter	animal-based food	2016	Salmonella enterica	enterica	Heidelberg	Heidelberg	>>>>>>>>>>>>	0	0	0	0	0	0	0	0	0	0	0	0	0	0	0	0	0	0	0	0	0	0	0	0	0	0	0	0	1	0	0	0	0	0	0	0	0	0	0	0
SRR7072118	NC_SH134	chicken cage after cleaning	environment	2016	Salmonella enterica	enterica	Heidelberg	Schwarzengrund	>>>>>>>>>>>>	0	0	0	0	0	0	0	1	1	0	1	0	0	0	0	0	0	0	1	0	0	0	0	0	0	0	0	0	0	0	0	0	1	0	0	0	0	0	0	0
SRR7072121	NC_SH137	Chicken liver	animal-based food	2016	Salmonella enterica	enterica	Heidelberg	Heidelberg	>>>>>>>>>>>>	0	0	0	0	0	0	0	0	0	0	0	0	0	0	0	0	0	0	0	0	0	0	0	0	0	0	0	0	0	0	0	0	0	0	0	0	0	0	0	0
SRR7072126	NC_SH127	chicken fillet sassami	animal-based food	2016	Salmonella enterica	enterica	Heidelberg	Schwarzengrund	>>>>>>>>>>>>	0	0	1	0	0	0	0	1	1	0	1	0	0	1	0	0	0	0	1	0	0	0	0	0	0	0	0	0	0	0	1	0	0	0	0	0	0	0	0	0
SRR7072128	NC_SH154	chicken carcass	animal-based food	2016	Salmonella enterica	enterica	Heidelberg	Heidelberg	>>>>>>>>>>>>	0	0	0	0	0	0	0	0	0	0	0	0	0	0	0	0	0	0	0	0	0	0	0	0	0	0	0	0	0	0	0	0	0	0	0	0	0	0	0	0
SRR7072129	NC_SH158	Fiesta boneless	animal-based food	2016	Salmonella enterica	enterica	Heidelberg	Schwarzengrund	>>>>>>>>>>>>	0	0	1	0	0	0	0	1	1	0	1	0	0	0	0	0	1	0	1	0	0	0	0	0	0	0	0	0	0	0	0	1	0	0	0	0	0	0	0	0
SRR7072141	NC_SH164	viscera	animal-based food	2016	Salmonella enterica	enterica	Heidelberg	Heidelberg	>>>>>>>>>>>>	0	0	0	0	0	0	0	0	0	0	0	0	0	1	0	0	1	0	0	0	0	0	0	0	0	0	0	0	0	0	0	0	0	0	0	0	0	0	0	0
SRR7072143	NC_SH125	chicken carcass	animal-based food	2016	Salmonella enterica	enterica	Heidelberg	Heidelberg	>>>>>>>>>>>>	0	0	0	0	0	0	0	0	0	0	0	0	0	0	0	0	0	0	0	0	0	0	0	0	0	0	0	0	0	0	0	0	0	0	0	0	0	0	0	0
SRR7072145	NC_SH157	chicken carcass	animal-based food	2016	Salmonella enterica	enterica	Heidelberg	Heidelberg	>>>>>>>>>>>>	0	0	0	0	0	0	0	0	0	0	0	0	0	0	0	0	0	0	0	0	0	0	0	0	0	1	0	0	0	0	0	0	0	0	0	0	0	0	0	0
SRR7072176	NC_SH128	chicken carcass	animal-based food	2016	Salmonella enterica	enterica	Heidelberg	Heidelberg	>>>>>>>>>>>>	0	0	0	0	0	0	0	0	0	0	0	0	0	0	0	0	0	0	0	0	0	0	0	0	0	0	0	0	0	0	0	0	0	0	0	0	0	0	0	0
SRR7072177	NC_SH129	chicken carcass	animal-based food	2016	Salmonella enterica	enterica	Heidelberg	Heidelberg	>>>>>>>>>>>>	0	0	0	0	0	0	0	0	0	0	0	0	0	0	0	0	0	0	0	0	0	0	0	0	0	0	0	0	0	0	0	0	0	0	0	0	0	0	0	0
SRR7072178	NC_SH266	chicken carcass	animal-based food	2016	Salmonella enterica	enterica	Heidelberg	Heidelberg	>>>>>>>>>>>>	0	0	0	0	0	0	0	0	0	0	0	0	0	0	0	0	0	0	0	0	0	0	0	0	0	0	0	0	0	0	0	0	0	0	0	0	0	0	0	0
SRR7072194	NC_SH147	chicken carcass	animal-based food	2016	Salmonella enterica	enterica	Heidelberg	Schwarzengrund	>>>>>>>>>>>>	0	0	1	0	0	0	0	0	1	0	1	0	0	1	0	0	0	0	1	0	0	0	0	0	0	0	0	0	0	0	0	0	0	0	0	0	0	0	0	0
SRR7072198	NC_SH269	Chicken carcass after chiller	animal-based food	2016	Salmonella enterica	enterica	Heidelberg	Heidelberg	>>>>>>>>>>>>	0	0	0	0	0	0	0	0	0	0	0	0	0	0	0	0	0	0	0	0	0	0	0	0	0	1	0	0	0	0	0	0	0	0	0	0	0	0	0	0
SRR7072200	NC_SH265	truck after cleaning	environment	2016	Salmonella enterica	enterica	Heidelberg	Heidelberg	>>>>>>>>>>>>	0	0	0	0	0	0	0	0	0	0	0	0	0	0	0	0	0	0	0	0	0	0	0	0	0	0	0	0	1	0	0	0	0	0	0	0	0	0	0	0
SRR7072202	NC_SH268	carcass after chiller	animal-based food	2016	Salmonella enterica	enterica	Heidelberg	Heidelberg	>>>>>>>>>>>>	0	0	0	0	0	0	0	0	0	0	0	0	0	0	0	0	0	0	0	0	0	0	0	0	0	0	0	0	1	0	0	0	0	0	0	0	0	0	0	0
SRR7072208	NC_SH270	Chicken carcass after chiller	animal-based food	2016	Salmonella enterica	enterica	Heidelberg	Heidelberg	>>>>>>>>>>>>	0	0	0	0	0	0	0	0	0	0	0	0	0	0	0	0	0	0	0	0	0	0	0	0	0	1	0	0	0	0	0	0	0	0	0	0	0	0	0	0
SRR7072217	NC_SH122	chicken carcass	animal-based food	2016	Salmonella enterica	enterica	Heidelberg	Heidelberg	>>>>>>>>>>>>	0	0	0	0	0	0	0	0	0	0	0	0	0	0	0	0	0	0	0	0	0	0	0	0	0	0	0	0	0	0	0	0	0	0	0	0	0	0	0	0
SRR7073432	NC_SH135	whole chicken	animal-based food	2016	Salmonella enterica	enterica	Heidelberg	Heidelberg	>>>>>>>>>>>>	0	0	0	0	0	0	0	0	0	0	0	0	0	0	0	0	0	0	0	0	0	0	0	0	0	1	0	0	0	0	0	0	0	0	0	0	0	0	0	0
SRR7079287	NC_SH159	chicken cage after cleaning	environment	2016	Salmonella enterica	enterica	Heidelberg	Heidelberg	>>>>>>>>>>>>	0	0	0	0	0	0	0	0	0	0	0	0	0	0	0	0	0	0	0	0	0	0	0	0	0	0	0	0	0	0	0	0	0	0	0	0	0	0	0	0
SRR7128413	NC_SI690	chicken cage after cleaning	environment	2016	Salmonella enterica	enterica	Infantis	Infantis	>>>>>>>>>>>>	0	0	0	0	0	0	0	0	0	0	0	0	0	0	0	0	0	0	0	0	0	0	0	0	0	0	0	0	0	0	0	0	0	0	0	0	0	0	0	0
SRR7130335	NC_SI666	slaughterhouse	environment	2016	Salmonella enterica	enterica	Infantis	Idikan	>>>>>>>>>>>>	0	0	0	0	0	0	0	0	0	0	0	0	0	0	0	0	0	0	0	0	0	0	0	0	0	0	0	0	0	0	0	0	0	0	0	0	0	0	0	0
SRR7130337	NC_SI708	truck after cleaning	environment	2016	Salmonella enterica	enterica	Infantis	Infantis	>>>>>>>>>>>>	0	0	0	0	0	0	0	0	0	0	0	0	0	0	0	0	0	0	0	0	0	0	0	0	0	0	0	0	0	0	0	0	0	0	0	0	0	0	0	0
SRR7130342	FDA00004787	pet treat/pig era strips	animal-based food	2011	Salmonella enterica	enterica	London	Schwarzengrund	>>>>>>>>>>>>	0	0	1	0	0	0	0	1	1	0	1	0	0	1	0	0	0	0	1	0	0	0	0	0	0	0	0	0	0	0	0	0	0	0	0	0	0	0	0	0
SRR7130344	FDA00000832	lobster tail	animal-based food	2005	Salmonella enterica	enterica	Agona	Schwarzengrund	>>>>>>>>>>>>	0	0	0	0	0	0	0	1	1	0	1	0	0	0	0	0	0	0	1	0	0	0	0	0	0	0	0	0	0	0	0	0	0	1	0	0	0	0	0	0
SRR7130365	NC_SI626	chicken gizzard	animal-based food	2016	Salmonella enterica	enterica	Infantis	Infantis	>>>>>>>>>>>>	0	0	0	0	0	0	0	0	0	0	0	0	0	0	0	0	0	0	0	0	0	0	0	0	0	0	0	0	0	0	0	0	0	0	0	0	0	0	0	0
SRR7130366	NC_SI625	mechanically recovered meat	animal-based food	2016	Salmonella enterica	enterica	Infantis	Infantis	>>>>>>>>>>>>	0	0	0	0	0	0	0	0	0	0	0	0	0	1	0	0	0	0	1	0	0	0	0	0	0	0	0	0	0	0	0	0	0	0	1	0	0	0	0	0
SRR7130375	NC_SH283	chicken carcass	animal-based food	2016	Salmonella enterica	enterica	Heidelberg	Heidelberg	>>>>>>>>>>>>	0	0	0	0	0	0	0	0	0	0	0	0	0	0	0	0	0	0	0	0	0	0	0	0	0	0	0	0	1	0	0	0	0	0	0	0	0	0	0	0
SRR7130523	NC_SI10088955	broiler chicken	animal-based food	2016	Salmonella enterica	enterica	Infantis	Infantis	>>>>>>>>>>>>	0	0	0	0	0	0	0	0	0	0	0	0	0	0	0	0	0	0	0	0	0	0	0	0	0	0	0	0	0	0	0	0	0	0	0	0	0	0	0	0
SRR7130546	NC_SI10105686	broiler chicken	animal-based food	2016	Salmonella enterica	enterica	Infantis	Infantis	>>>>>>>>>>>>	0	0	0	0	0	0	0	0	0	0	0	0	0	0	0	0	0	0	0	0	0	0	0	0	0	0	0	0	0	0	0	0	0	0	0	0	0	0	0	0
SRR7130550	FDA00001899	beef dog chews	animal-based food	2003	Salmonella enterica	enterica	Muenster	Kentucky	>>>>>>>>>>>>	0	0	0	0	0	0	0	0	0	0	0	0	0	0	0	0	0	0	0	0	0	0	0	0	0	0	0	0	0	0	0	0	0	0	0	0	0	0	0	0
SRR7130551	FDA00001145	frozen lobster tail	animal-based food	2007	Salmonella enterica	enterica	Newport	Minnesota	>>>>>>>>>>>>	0	0	0	0	0	1	0	0	0	0	0	0	1	0	0	0	0	0	0	0	0	0	0	0	0	0	0	0	1	0	0	0	0	0	0	0	0	0	0	0
SRR7130552	FDA00004690	pet treat/dog treat	animal-based food	2010	Salmonella enterica	enterica	Agona	Mbandaka	>>>>>>>>>>>>	0	0	0	0	0	0	0	0	0	0	0	0	0	0	0	0	0	0	0	0	0	0	0	0	0	0	0	0	0	0	0	0	0	0	0	0	0	0	0	0
SRR7130554	ADRDL-778	Meat Meal	animal-based food	2008	Salmonella enterica	enterica	Anatum	Kentucky	>>>>>>>>>>>>	0	0	0	0	0	0	0	0	0	0	0	0	0	0	0	0	0	0	0	0	0	0	0	0	0	0	0	0	0	0	0	0	0	0	0	0	0	0	0	0
SRR7130557	NC_SH720	chicken carcass	animal-based food	2016	Salmonella enterica	enterica	Heidelberg	Orion	>>>>>>>>>>>>	0	0	0	0	0	0	0	0	0	0	0	0	0	0	0	0	0	0	0	0	0	0	0	0	0	0	0	0	0	0	0	0	0	0	0	0	0	0	0	0
SRR7130561	NC_SMi124	chicken carcass	animal-based food	2016	Salmonella enterica	enterica	Heidelberg	Minnesota	>>>>>>>>>>>>	0	0	0	0	0	1	0	0	0	0	0	0	1	0	0	0	0	0	0	0	0	0	0	0	0	0	0	0	1	0	0	1	0	0	0	0	0	0	0	0
SRR7130567	NC_SH284	chicken carcass	animal-based food	2016	Salmonella enterica	enterica	Heidelberg	Heidelberg	>>>>>>>>>>>>	0	0	0	0	0	0	0	0	0	0	0	0	0	0	0	0	0	0	0	0	0	0	0	0	0	0	0	0	0	0	0	0	0	0	0	0	0	0	0	0
SRR7184943	NC_SSc148	chicken carcass	animal-based food	2016	Salmonella enterica	enterica	Schwarzengrund	Heidelberg	>>>>>>>>>>>>	0	0	0	0	0	0	0	0	0	0	0	0	0	0	0	0	0	0	0	0	0	0	0	0	0	0	0	0	0	1	0	0	0	0	0	0	0	0	0	0
SRR7184989	ADRDL-771	Meat Meal	animal-based food	2008	Salmonella enterica	enterica	Anatum	Ouakam	>>>>>>>>>>>>	0	0	0	0	0	0	0	0	0	0	0	0	0	0	0	0	0	0	0	0	0	0	0	0	0	0	0	0	0	0	0	0	0	0	0	0	0	0	0	0
SRR7185070	NC_SSe331	chicken carcass	animal-based food	2016	Salmonella enterica	enterica	Senftenberg	Senftenberg	>>>>>>>>>>>>	0	0	0	0	0	0	0	0	0	0	0	0	0	0	0	0	0	0	0	0	0	0	0	0	0	0	0	0	0	0	0	0	0	0	0	0	0	0	0	0
SRR7185071	NC_SSc156	chicken carcass	animal-based food	2016	Salmonella enterica	enterica	Schwarzengrund	Schwarzengrund	>>>>>>>>>>>>	0	0	0	0	0	0	0	1	1	0	1	0	0	0	0	0	0	0	1	0	0	0	0	0	0	0	0	0	0	0	0	0	1	0	0	0	0	0	0	0
SRR7185082	NC_SSe713	mechanically recovered meat	animal-based food	2016	Salmonella enterica	enterica	Senftenberg	Senftenberg	>>>>>>>>>>>>	0	0	0	0	0	0	0	0	0	0	0	0	0	0	0	0	0	0	0	0	0	0	0	0	0	0	0	0	0	0	0	0	0	0	0	0	0	0	0	0
SRR7185127	ADRDL-793	Meat and bones Meal	animal-based food	2008	Salmonella enterica	enterica	Mbandaka	Orion	>>>>>>>>>>>>	0	0	0	0	0	0	0	0	0	0	0	0	0	0	0	0	0	0	0	0	0	0	0	0	0	0	0	0	0	0	0	0	0	0	0	0	0	0	0	0
SRR7185128	NC_SSc161	mechanically recovered meat	animal-based food	2016	Salmonella enterica	enterica	Schwarzengrund	Schwarzengrund	>>>>>>>>>>>>	0	0	0	0	0	0	0	0	0	0	0	0	0	0	0	0	0	0	0	0	0	0	0	0	0	0	0	0	0	0	0	0	0	0	0	0	0	0	0	0
SRR7186255	NC_STy100922373	Swine slaughterhouse	environment	2016	Salmonella enterica	enterica	Typhimurium	Typhimurium	>>>>>>>>>>>>	0	0	0	0	0	0	0	0	0	0	0	0	0	0	0	0	0	0	0	0	0	0	0	0	0	0	0	0	0	0	0	0	0	0	0	0	0	0	0	0
SRR7186257	FDA00012025	Lobster Tails	animal-based food	2010	Salmonella enterica	enterica	Saintpaul	Muenchen	>>>>>>>>>>>>	0	0	0	0	0	0	0	0	0	0	0	0	0	0	0	0	0	0	0	0	0	0	0	0	0	0	0	0	0	0	0	0	0	0	0	0	0	0	0	0
SRR7186258	NC_SSc153	chicken carcass	animal-based food	2016	Salmonella enterica	enterica	Schwarzengrund	Minnesota	>>>>>>>>>>>>	0	0	0	0	0	0	0	0	0	0	0	0	0	0	0	0	0	0	0	0	0	0	0	0	0	0	0	0	0	0	0	0	0	0	0	0	0	0	0	0
SRR7186260	NC_S711	mechanically recovered meat	animal-based food	2016	Salmonella enterica	enterica	4[5]12:i:-	Minnesota	>>>>>>>>>>>>	0	0	0	0	0	0	0	0	0	0	0	0	0	0	0	0	0	0	0	0	0	0	0	0	0	0	0	0	0	0	0	0	0	0	0	0	0	0	0	0
SRR7186369	NC_S262	Swine carcass	animal-based food	2016	Salmonella enterica	enterica	5[5]12:i:-	Minnesota	>>>>>>>>>>>>	0	0	0	0	0	0	0	0	0	0	0	0	0	0	0	0	0	0	0	0	0	0	0	0	0	0	0	0	0	0	0	0	0	0	0	0	0	0	0	0
SRR7186370	NC_S417	slaughterhouse	environment	2016	Salmonella enterica	enterica	6[5]12:i:-	Montevideo	>>>>>>>>>>>>	0	0	0	0	0	0	0	0	0	0	0	0	0	0	0	0	0	0	0	0	0	0	0	0	0	0	0	0	0	0	0	0	0	0	0	0	0	0	0	0
SRR7186448	NC_SSe717	chicken carcass	animal-based food	2016	Salmonella enterica	enterica	Senftenberg	Senftenberg	>>>>>>>>>>>>	0	0	0	0	0	0	0	0	0	0	0	0	0	0	0	0	0	0	0	0	0	0	0	0	0	0	0	0	0	0	0	0	0	0	0	0	0	0	0	0
SRR7186454	NC_SMb279	truck after cleaning	environment	2016	Salmonella enterica	enterica	Mbandaka	Minnesota	>>>>>>>>>>>>	0	0	0	0	0	0	0	0	0	0	0	0	0	0	0	0	0	0	0	0	0	0	0	0	0	0	0	0	0	0	0	0	0	0	0	0	0	0	0	0
SRR7186671	NC_SMon163	feather meal	animal-based food	2016	Salmonella enterica	enterica	Montevideo	Newport	>>>>>>>>>>>>	0	0	0	1	0	0	0	0	0	0	0	0	1	0	0	0	0	0	0	0	0	0	0	0	0	0	0	0	0	0	0	0	1	0	0	0	0	0	0	0
SRR7188845	NC_SH296	mechanically recovered meat	animal-based food	2016	Salmonella enterica	enterica	Heidelberg	Heidelberg	>>>>>>>>>>>>	0	0	0	0	0	0	0	0	0	0	0	0	0	0	0	0	0	0	0	0	0	0	0	0	0	1	0	0	0	0	0	0	0	0	0	0	0	0	0	0
SRR7188961	NC_STy9376066	broiler chicken	animal-based food	2016	Salmonella enterica	enterica	Typhimurium	Typhimurium	>>>>>>>>>>>>	0	0	0	0	0	0	0	1	0	0	1	0	0	0	0	0	0	0	0	0	0	0	0	0	0	0	0	0	0	0	0	0	0	0	1	0	0	0	0	0
SRR7190735	NC_SH285	chicken carcass	animal-based food	2016	Salmonella enterica	enterica	Heidelberg	Heidelberg	>>>>>>>>>>>>	0	0	0	0	0	0	0	0	0	0	0	0	0	0	0	0	0	0	0	0	0	0	0	0	0	1	0	0	0	0	0	0	0	0	0	0	0	0	0	0
SRR7191085	NC_STy9376066	broiler chicken	animal-based food	2016	Salmonella enterica	enterica	Typhimurium	Typhimurium	>>>>>>>>>>>>	0	0	0	0	0	0	0	0	0	0	0	0	0	0	0	0	0	0	0	0	0	0	0	0	0	0	0	0	0	0	0	0	0	0	0	0	0	0	0	0
SRR7191155	NC_STy9727572	Swine slaughterhouse	environment	2016	Salmonella enterica	enterica	Typhimurium	Typhimurium	>>>>>>>>>>>>	0	0	0	0	0	0	0	0	0	0	0	0	0	0	0	0	0	0	0	0	0	0	0	0	0	0	0	0	0	0	0	0	0	0	0	0	0	0	0	0
SRR7192200	NC_STy9727572	Swine slaughterhouse	environment	2016	Salmonella enterica	enterica	Typhimurium	Typhimurium	>>>>>>>>>>>>	0	0	0	0	0	0	0	0	0	0	0	0	0	0	0	0	0	0	0	0	0	0	0	0	0	0	0	0	0	0	0	0	0	0	0	0	0	0	0	0
SRR7192261	NC_SH285	chicken carcass	animal-based food	2016	Salmonella enterica	enterica	Heidelberg	Heidelberg	>>>>>>>>>>>>	0	0	0	0	0	0	0	0	0	0	0	0	0	0	0	0	0	0	0	0	0	0	0	0	0	0	0	0	0	1	0	0	0	0	0	0	0	0	0	0
SRR7192444	NC_SH403	Seasoned chicken fillet	animal-based food	2016	Salmonella enterica	enterica	Heidelberg	Abony	>>>>>>>>>>>>	0	0	0	0	0	0	0	0	0	0	0	0	0	0	0	0	0	0	0	0	0	0	0	0	0	0	0	0	0	0	0	0	0	0	0	0	0	0	0	0
SRR7192445	NC_SH403	Seasoned chicken fillet	animal-based food	2016	Salmonella enterica	enterica	Heidelberg	Heidelberg	>>>>>>>>>>>>	0	0	0	0	0	0	0	0	0	0	0	0	0	0	0	0	0	0	0	0	0	0	0	0	0	1	0	0	0	0	0	0	0	0	0	0	0	0	0	0
SRR7192446	NC_SH290	Chicken liver	animal-based food	2016	Salmonella enterica	enterica	Heidelberg	Heidelberg	>>>>>>>>>>>>	0	0	0	0	0	0	0	0	0	0	0	0	0	0	0	0	0	0	0	0	0	0	0	0	0	0	0	0	1	0	0	0	0	0	0	0	0	0	0	0
SRR7192447	NC_SH290	Chicken liver	animal-based food	2016	Salmonella enterica	enterica	Heidelberg	Brandenburg	>>>>>>>>>>>>	0	0	0	0	0	0	0	0	0	0	0	0	0	0	0	0	0	0	0	0	0	0	0	0	0	1	0	0	0	0	0	0	0	0	0	0	0	0	0	0
SRR7219557	NC_SH410	Chicken breast fillet	animal-based food	2016	Salmonella enterica	enterica	Heidelberg	Heidelberg	>>>>>>>>>>>>	0	0	0	0	0	0	0	0	0	0	0	0	0	0	0	0	0	0	0	0	0	0	0	0	0	1	0	0	0	0	0	0	0	0	0	0	0	0	0	0
SRR7219909	NC_STy9	slaughterhouse	environment	2016	Salmonella enterica	enterica	Typhimurium	Typhimurium	>>>>>>>>>>>>	0	0	0	0	0	0	0	0	0	0	0	0	0	0	0	0	0	0	0	0	0	0	0	0	0	0	0	0	0	0	0	0	0	0	0	0	0	0	0	0
SRR7220939	NC_STy9	slaughterhouse	environment	2016	Salmonella enterica	enterica	Typhimurium	Typhimurium	>>>>>>>>>>>>	0	0	0	0	0	0	0	0	0	0	0	0	0	0	0	0	0	0	0	0	0	0	0	0	0	0	0	0	0	0	0	0	0	0	0	0	0	0	0	0
SRR7221027	NC_STy9727578	Swine slaughterhouse	environment	2016	Salmonella enterica	enterica	Typhimurium	Typhimurium	>>>>>>>>>>>>	0	0	0	0	0	0	0	0	0	0	0	0	0	0	0	0	0	0	0	0	0	0	0	0	0	0	0	0	0	0	0	0	0	0	0	0	0	0	0	0
SRR7221031	NC_SH410	Chicken breast fillet	animal-based food	2016	Salmonella enterica	enterica	Heidelberg	Heidelberg	>>>>>>>>>>>>	0	0	0	0	0	0	0	0	0	0	0	0	0	0	0	0	0	0	0	0	0	0	0	0	0	0	0	0	1	0	0	0	0	0	0	0	0	0	0	0
SRR7221191	NC_STy280	mechanically recovered meat	animal-based food	2016	Salmonella enterica	enterica	Typhimurium	Typhimurium	>>>>>>>>>>>>	0	0	0	0	0	0	0	0	0	0	0	0	0	0	0	0	0	0	0	0	0	0	0	0	0	0	0	0	0	0	0	0	0	0	0	0	0	0	0	0
SRR7221214	NC_SH409	Chicken liver	animal-based food	2016	Salmonella enterica	enterica	Heidelberg	Abony	>>>>>>>>>>>>	0	0	0	0	0	0	0	0	0	0	0	0	0	0	0	0	0	0	0	0	0	0	0	0	0	0	0	0	1	0	0	0	0	0	0	0	0	0	0	0
SRR7221348	NC_SH402	Chicken liver	animal-based food	2016	Salmonella enterica	enterica	Heidelberg	Heidelberg	>>>>>>>>>>>>	0	0	0	0	0	0	0	0	0	0	0	0	0	0	0	0	0	0	0	0	0	0	0	0	0	0	0	0	1	0	0	0	0	0	0	0	0	0	0	0
SRR7221474	NC_SH297	mechanically recovered meat	animal-based food	2016	Salmonella enterica	enterica	Heidelberg	Heidelberg	>>>>>>>>>>>>	0	0	0	0	0	0	0	0	0	0	0	0	0	0	0	0	0	0	0	0	0	0	0	0	0	1	0	0	0	0	0	0	0	0	0	0	0	0	0	0
SRR7221475	NC_SH297	mechanically recovered meat	animal-based food	2016	Salmonella enterica	enterica	Heidelberg	Heidelberg	>>>>>>>>>>>>	0	0	0	0	0	0	0	0	0	0	0	0	0	0	0	0	0	0	0	0	0	0	0	0	0	0	0	0	1	0	0	0	0	0	0	0	0	0	0	0
SRR7221476	NC_SH291	chicken breast	animal-based food	2016	Salmonella enterica	enterica	Heidelberg	Heidelberg	>>>>>>>>>>>>	0	0	0	0	0	0	0	0	0	0	0	0	0	0	0	0	0	0	0	0	0	0	0	0	0	1	0	0	0	0	0	0	0	0	0	0	0	0	0	0
SRR7221505	NC_SH291	chicken breast	animal-based food	2016	Salmonella enterica	enterica	Heidelberg	Abony	>>>>>>>>>>>>	0	0	0	0	0	0	0	0	0	0	0	0	0	0	0	0	0	0	0	0	0	0	0	0	0	0	0	0	0	0	0	0	0	0	0	0	0	0	0	0
SRR7221527	NC_SH412	Chicken wing	animal-based food	2016	Salmonella enterica	enterica	Heidelberg	Brandenburg	>>>>>>>>>>>>	0	0	0	0	0	0	0	0	0	0	0	0	0	0	0	0	0	0	0	0	0	0	0	0	0	1	0	0	0	0	0	0	0	0	0	0	0	0	0	0
SRR7221528	NC_SH405	Chicken breast fillet	animal-based food	2016	Salmonella enterica	enterica	Heidelberg	Heidelberg	>>>>>>>>>>>>	0	0	0	0	0	0	0	0	0	0	0	0	0	0	0	0	0	0	0	0	0	0	0	0	0	1	0	0	0	0	0	0	0	0	0	0	0	0	0	0
SRR7221529	NC_SH411	Chicken thigh and drumstick	animal-based food	2016	Salmonella enterica	enterica	Heidelberg	Heidelberg	>>>>>>>>>>>>	0	0	0	0	0	0	0	0	0	0	0	0	0	0	0	0	0	0	0	0	0	0	0	0	0	0	0	0	0	0	0	0	0	0	0	0	0	0	0	0
SRR7221614	NC_SH408	Chicken liver	animal-based food	2016	Salmonella enterica	enterica	Heidelberg	Heidelberg	>>>>>>>>>>>>	0	0	0	0	0	0	0	0	0	0	0	0	0	0	0	0	0	0	0	0	0	0	0	0	0	1	0	0	0	0	0	0	0	0	0	0	0	0	0	0
SRR7221645	NC_SH289	Seasoned chicken fillet	animal-based food	2016	Salmonella enterica	enterica	Heidelberg	Heidelberg	>>>>>>>>>>>>	0	0	0	0	0	0	0	0	0	0	0	0	0	0	0	0	0	0	0	0	0	0	0	0	0	0	0	0	1	0	0	0	0	0	0	0	0	0	0	0
SRR7221647	NC_SH287	Chicken skin	animal-based food	2016	Salmonella enterica	enterica	Heidelberg	Heidelberg	>>>>>>>>>>>>	0	0	0	0	0	0	0	0	0	0	0	0	0	0	0	0	0	0	0	0	0	0	0	0	0	1	0	0	0	0	0	0	0	0	0	0	0	0	0	0
SRR7221657	NC_SH286	Chicken thigh and drumstick	animal-based food	2016	Salmonella enterica	enterica	Heidelberg	Heidelberg	>>>>>>>>>>>>	0	0	0	0	0	0	0	0	0	0	0	0	0	0	0	0	0	0	0	0	0	0	0	0	0	1	0	0	0	0	0	0	0	0	0	0	0	0	0	0
SRR7221739	NC_STy8876448	broiler chicken	animal-based food	2016	Salmonella enterica	enterica	Typhimurium	Typhimurium	>>>>>>>>>>>>	0	0	0	0	0	0	0	0	0	0	0	0	0	0	0	0	0	0	0	0	0	0	0	0	0	0	0	0	0	0	0	0	0	0	0	0	0	0	0	0
SRR7221747	NC_STy100922376	Swine slaughterhouse	environment	2016	Salmonella enterica	enterica	Typhimurium	Typhimurium	>>>>>>>>>>>>	0	0	0	0	0	0	0	1	0	0	1	0	0	0	0	0	0	0	0	0	0	0	0	0	0	0	0	0	0	0	0	0	0	0	1	0	0	0	0	0
SRR7229075	NC_SH414	truck after cleaning	environment	2016	Salmonella enterica	enterica	Heidelberg	Heidelberg	>>>>>>>>>>>>	0	0	0	0	0	0	0	0	0	0	0	0	0	0	0	0	0	0	0	0	0	0	0	0	0	0	0	1	0	0	0	0	0	0	0	0	0	0	0	0
SRR7229077	NC_SH423	Chicken liver	animal-based food	2016	Salmonella enterica	enterica	Heidelberg	Heidelberg	>>>>>>>>>>>>	0	0	0	0	0	0	0	0	0	0	0	0	0	0	0	0	0	0	0	0	0	0	0	0	0	1	0	0	0	0	0	0	0	0	0	0	0	0	0	0
SRR7229826	NC_SH421	Chicken wing	animal-based food	2016	Salmonella enterica	enterica	Heidelberg	Rissen	>>>>>>>>>>>>	0	0	0	0	0	0	0	0	0	0	0	0	0	0	0	0	0	0	0	0	0	0	0	0	0	0	0	0	0	0	0	0	0	0	0	0	0	0	0	0
SRR7230389	NC_SH434	chicken cage after cleaning	environment	2016	Salmonella enterica	enterica	Heidelberg	Heidelberg	>>>>>>>>>>>>	0	0	0	0	0	0	0	0	0	0	0	0	0	0	0	0	0	0	0	0	0	0	0	0	0	0	0	0	0	1	0	0	0	0	0	0	0	0	0	0
SRR7230673	NC_SH431	Chicken liver	animal-based food	2016	Salmonella enterica	enterica	Heidelberg	Heidelberg	>>>>>>>>>>>>	0	0	0	0	0	0	0	0	0	0	0	0	0	0	0	0	0	0	0	0	0	0	0	0	0	0	0	0	1	0	0	0	0	0	0	0	0	0	0	0
SRR7230743	NC_SH433	truck after cleaning	environment	2016	Salmonella enterica	enterica	Heidelberg	Heidelberg	>>>>>>>>>>>>	0	0	0	0	0	0	0	0	0	0	0	0	0	0	0	0	0	0	0	0	0	0	0	0	0	1	0	0	0	0	0	0	0	0	0	0	0	0	0	0
SRR7230883	NC_SH422	Chicken liver	animal-based food	2016	Salmonella enterica	enterica	Heidelberg	Heidelberg	>>>>>>>>>>>>	0	0	0	0	0	0	0	0	0	0	0	0	0	0	0	0	0	0	0	0	0	0	0	0	0	1	0	0	0	0	0	0	0	0	0	0	0	0	0	0
SRR7232003	NC_SH498	chicken carcass	animal-based food	2016	Salmonella enterica	enterica	Heidelberg	Infantis	>>>>>>>>>>>>	0	0	0	0	0	0	0	0	0	0	0	0	0	0	0	0	0	0	0	0	0	0	0	0	0	0	0	0	0	0	0	0	0	0	0	0	0	0	0	0
SRR7232219	NC_SH435	truck after cleaning	environment	2016	Salmonella enterica	enterica	Heidelberg	Heidelberg	>>>>>>>>>>>>	0	0	0	0	0	0	0	0	0	0	0	0	0	0	0	0	0	0	0	0	0	0	0	0	0	0	0	0	0	0	0	0	0	0	0	0	0	0	0	0
SRR7232306	NC_SH430	Chicken liver	animal-based food	2016	Salmonella enterica	enterica	Heidelberg	Heidelberg	>>>>>>>>>>>>	0	0	0	0	0	0	0	0	0	0	0	0	0	0	0	0	0	0	0	0	0	0	0	0	0	1	0	0	0	0	0	0	0	0	0	0	0	0	0	0
SRR7232314	NC_SH426	truck after cleaning	environment	2016	Salmonella enterica	enterica	Heidelberg	I 1,4,[5],12:d:-	>>>>>>>>>>>>	0	0	0	0	0	0	0	0	0	0	0	0	0	0	0	0	0	0	0	0	0	0	0	0	0	0	0	0	0	0	0	0	0	0	0	0	0	0	0	0
SRR7232379	NC_SH427	whole chicken	animal-based food	2016	Salmonella enterica	enterica	Heidelberg	Heidelberg	>>>>>>>>>>>>	0	0	0	0	0	0	0	0	0	0	0	0	0	0	0	0	0	0	0	0	0	0	0	0	0	1	0	0	0	0	0	0	0	0	0	0	0	0	0	0
SRR7232380	NC_SH429	Chicken liver	animal-based food	2016	Salmonella enterica	enterica	Heidelberg	Heidelberg	>>>>>>>>>>>>	0	0	0	0	0	0	0	0	0	0	0	0	0	0	0	0	0	0	0	0	0	0	0	0	0	0	0	0	0	0	0	0	0	0	0	0	0	0	0	0
SRR7232381	NC_SH432	Chicken liver	animal-based food	2016	Salmonella enterica	enterica	Heidelberg	Rissen	>>>>>>>>>>>>	0	0	0	0	0	0	0	0	0	0	0	0	0	0	0	0	0	0	0	0	0	0	0	0	0	0	0	0	0	0	0	0	0	0	0	0	0	0	0	0
SRR7232984	NC_SH691	Chicken wing	animal-based food	2016	Salmonella enterica	enterica	Heidelberg	Heidelberg	>>>>>>>>>>>>	0	0	0	0	0	0	0	0	0	0	0	0	0	0	0	0	0	0	0	0	0	0	0	0	0	1	0	0	0	0	0	0	0	0	0	0	0	0	0	0
SRR7232990	NC_SH674	Chicken liver	animal-based food	2016	Salmonella enterica	enterica	Heidelberg	Heidelberg	>>>>>>>>>>>>	0	0	0	0	0	0	0	0	0	0	0	0	0	0	0	0	0	0	0	0	0	0	0	0	0	0	0	0	1	0	0	0	0	0	0	0	0	0	0	0
SRR7233008	NC_SH415	chicken cage after cleaning	environment	2016	Salmonella enterica	enterica	Heidelberg	Heidelberg	>>>>>>>>>>>>	0	0	0	0	0	0	0	0	0	0	0	0	0	0	0	0	0	0	0	0	0	0	0	0	0	0	0	0	0	1	0	0	0	0	0	0	0	0	0	0
SRR7233552	NC_SH420	Chicken breast fillet	animal-based food	2016	Salmonella enterica	enterica	Heidelberg	Rissen	>>>>>>>>>>>>	0	0	0	0	0	0	0	0	0	0	0	0	0	0	0	0	0	0	0	0	0	0	0	0	0	0	0	0	0	0	0	0	0	0	0	0	0	0	0	0
SRR7233581	NC_SH680	retail meat	animal-based food	2016	Salmonella enterica	enterica	Heidelberg	Heidelberg	>>>>>>>>>>>>	0	0	0	0	0	0	0	0	0	0	0	0	0	0	0	0	0	0	0	0	0	0	0	0	0	0	0	0	0	1	0	0	0	0	0	0	0	0	0	0
SRR7233615	NC_SH681	Chicken wing	animal-based food	2016	Salmonella enterica	enterica	Heidelberg	Heidelberg	>>>>>>>>>>>>	0	0	0	0	0	0	0	0	0	0	0	0	0	0	0	0	0	0	0	0	0	0	0	0	0	0	0	0	1	0	0	0	0	0	0	0	0	0	0	0
SRR7233616	NC_SH685	chicken neck	animal-based food	2016	Salmonella enterica	enterica	Heidelberg	Heidelberg	>>>>>>>>>>>>	0	0	0	0	0	0	0	0	0	0	0	0	0	0	0	0	0	0	0	0	0	0	0	0	0	0	0	0	1	0	0	0	0	0	0	0	0	0	0	0
SRR7233621	NC_SH686	mechanically recovered meat	animal-based food	2016	Salmonella enterica	enterica	Heidelberg	Brandenburg	>>>>>>>>>>>>	0	0	0	0	0	0	0	0	0	0	0	0	0	0	0	0	0	0	0	0	0	0	0	0	0	0	0	0	0	0	0	0	0	0	0	0	0	0	0	0
SRR7241938	NC_SH707	Chicken liver	animal-based food	2016	Salmonella enterica	enterica	Heidelberg	Heidelberg	>>>>>>>>>>>>	0	0	0	0	0	0	0	0	0	0	0	0	0	0	0	0	0	0	0	0	0	0	0	0	0	0	0	0	0	0	0	0	0	0	0	0	0	0	0	0
SRR7241940	NC_SH697	mechanically recovered meat	animal-based food	2016	Salmonella enterica	enterica	Heidelberg	Heidelberg	>>>>>>>>>>>>	0	0	0	0	0	0	0	0	0	0	0	0	0	0	0	0	0	0	0	0	0	0	0	0	0	0	0	0	1	0	0	0	0	0	0	0	0	0	0	0
SRR7242751	NC_SH700	mechanically recovered meat	animal-based food	2016	Salmonella enterica	enterica	Heidelberg	Heidelberg	>>>>>>>>>>>>	0	0	0	0	0	0	0	0	0	0	0	0	0	0	0	0	0	0	0	0	0	0	0	0	0	0	0	0	1	0	0	0	0	0	0	0	0	0	0	0
SRR7242913	NC_SH10227492	broiler chicken	animal-based food	2016	Salmonella enterica	enterica	Heidelberg	Heidelberg	>>>>>>>>>>>>	0	0	0	0	0	0	0	0	0	0	0	0	0	0	0	0	0	0	0	0	0	0	0	0	0	0	0	0	0	0	0	0	0	0	0	0	0	0	0	0
SRR7244087	NC_SH716	chicken Wing Paddle	animal-based food	2016	Salmonella enterica	enterica	Heidelberg	Heidelberg	>>>>>>>>>>>>	0	0	0	0	0	0	0	0	0	0	0	0	0	0	0	0	0	0	0	0	0	0	0	0	0	0	0	0	1	0	0	0	0	0	0	0	0	0	0	0
SRR7244211	NC_SH712	mechanically recovered meat	animal-based food	2016	Salmonella enterica	enterica	Heidelberg	Heidelberg	>>>>>>>>>>>>	0	0	0	0	0	0	0	0	0	0	0	0	0	0	0	0	0	0	0	0	0	0	0	0	0	0	0	0	1	0	0	0	0	0	0	0	0	0	0	0
SRR7249331	NC_SH715	chicken cage after cleaning	environment	2016	Salmonella enterica	enterica	Heidelberg	Heidelberg	>>>>>>>>>>>>	0	0	0	1	0	0	0	0	0	0	0	0	1	0	0	0	0	0	0	0	0	0	0	0	0	0	0	0	0	0	0	0	0	0	0	0	0	0	0	0
SRR7249499	NC_SH10230048	broiler chicken	animal-based food	2016	Salmonella enterica	enterica	Heidelberg	Rissen	>>>>>>>>>>>>	0	0	0	0	0	0	0	0	0	0	0	0	0	0	0	0	0	0	0	0	0	0	0	0	0	0	0	0	0	0	0	0	0	0	0	0	0	0	0	0
SRR7249775	NC_SH694	Chicken breast fillet	animal-based food	2016	Salmonella enterica	enterica	Heidelberg	Heidelberg	>>>>>>>>>>>>	0	0	0	0	0	0	0	0	0	0	0	0	0	0	0	0	0	0	0	0	0	0	0	0	0	0	0	0	1	0	0	0	0	0	0	0	0	0	0	0
SRR7249857	NC_SH10211124	broiler chicken	animal-based food	2016	Salmonella enterica	enterica	Heidelberg	Heidelberg	>>>>>>>>>>>>	0	0	0	0	0	0	0	0	0	0	0	0	0	0	0	0	0	0	0	0	0	0	0	0	0	0	0	0	0	0	0	0	0	0	0	0	0	0	0	0
SRR7250105	NC_SH10230633	broiler chicken	animal-based food	2016	Salmonella enterica	enterica	Heidelberg	Heidelberg	>>>>>>>>>>>>	0	0	0	0	0	1	0	0	0	0	0	0	0	0	0	0	0	0	0	0	0	0	0	0	0	0	0	0	1	0	0	0	0	0	0	0	0	0	0	0
SRR7250125	NC_SH693	Chicken wing	animal-based food	2016	Salmonella enterica	enterica	Heidelberg	Heidelberg	>>>>>>>>>>>>	0	0	0	0	0	0	0	0	0	0	0	0	0	0	0	0	0	0	0	0	0	0	0	0	0	1	0	0	0	0	0	0	0	0	0	0	0	0	0	0
SRR7250128	NC_SE08	broiler chicken	animal-based food	2016	Salmonella enterica	enterica	Enteritidis	Enteritidis	>>>>>>>>>>>>	0	0	0	0	0	0	0	0	0	0	0	0	0	0	0	0	0	0	0	0	0	0	0	0	0	0	0	0	0	0	0	0	0	0	0	0	0	0	0	0
SRR7250816	NC_SH706	Chicken liver	animal-based food	2016	Salmonella enterica	enterica	Heidelberg	Infantis	>>>>>>>>>>>>	0	0	0	0	0	0	0	0	0	0	0	0	0	0	0	0	0	0	0	0	0	0	0	0	0	0	0	0	0	0	0	0	0	0	0	0	0	0	0	0
SRR7282629	ULBRA-SA207	Flock Environment (Broilers)	environment	2016	Salmonella enterica	enterica	Heidelberg	Heidelberg	>>>>>>>>>>>>	0	0	0	0	0	0	0	0	0	0	0	0	0	0	0	0	0	0	0	0	0	0	0	0	0	0	0	0	0	0	0	1	0	0	0	0	0	0	0	0
SRR7284513	RS-SF03456/10	Potatoes	food	2010	Salmonella enterica	enterica	Enteritidis	Enteritidis	>>>>>>>>>>>>	0	0	0	0	0	0	0	0	0	0	0	0	0	0	0	0	0	0	0	0	0	0	0	0	0	0	0	0	0	0	0	0	0	0	0	0	0	0	0	0
SRR7284655	UFRGS-SA047	Carcasses (Swine)	animal-based food	2011	Salmonella enterica	enterica	Typhimurium	Typhimurium	>>>>>>>>>>>>	0	0	0	0	0	0	0	0	0	0	0	0	0	0	1	0	0	0	0	0	0	1	0	0	0	0	0	0	0	0	0	0	0	0	0	1	0	0	0	0
SRR7284658	ULBRA-SA010	Viscera (Breeders)	animal-based food	2014	Salmonella enterica	enterica	Gallinarum	Gallinarum	>>>>>>>>>>>>	0	0	0	0	0	0	0	0	0	0	0	0	0	0	0	0	0	0	0	0	0	0	0	0	0	0	0	0	0	0	0	0	0	0	0	0	0	0	0	0
SRR7284659	UFRGS-SA042	Carcasses (Swine)	animal-based food	2009	Salmonella enterica	enterica	Typhimurium	Typhimurium	>>>>>>>>>>>>	0	0	1	0	0	0	1	1	1	1	1	0	0	0	0	0	0	0	0	0	0	0	0	0	0	0	0	0	0	0	0	0	0	0	0	1	0	0	0	0
SRR7284661	ULBRA-SA065	Poultry Flock	animal-based food	2014	Salmonella enterica	enterica	Typhimurium	Typhimurium	>>>>>>>>>>>>	0	0	0	0	0	0	0	0	0	0	0	0	0	0	0	0	0	0	0	0	0	0	0	0	0	0	0	0	0	0	0	0	0	0	0	0	0	0	0	0
SRR7284664	UFRGS-SA051	Carcasses (Swine)	animal-based food	2015	Salmonella enterica	enterica	Typhimurium	Typhimurium	>>>>>>>>>>>>	0	1	0	0	0	0	1	1	0	1	1	0	0	0	1	0	0	0	0	0	0	0	0	0	0	0	0	0	0	0	0	0	0	0	0	1	0	0	0	0
SRR7284708	RS-SF09692/13	Pastry	food	2013	Salmonella enterica	enterica	Typhimurium	Typhimurium	>>>>>>>>>>>>	1	0	0	0	0	1	0	0	0	0	0	0	0	0	0	0	0	0	0	0	0	0	0	0	0	0	0	0	0	0	0	0	0	0	0	1	0	0	0	0
SRR7284709	ULBRA-SA255	Flock Environment (Broilers)	environment	2016	Salmonella enterica	enterica	Typhimurium	Typhimurium	>>>>>>>>>>>>	0	0	0	0	0	0	1	1	0	1	1	0	0	0	0	0	0	0	0	0	0	0	0	0	0	0	0	0	0	0	0	0	0	0	0	1	0	0	0	0
SRR7284710	UFRGS-SA024	Feces (Swine)	clinical-animal	2000	Salmonella enterica	enterica	Heidelberg	Heidelberg	>>>>>>>>>>>>	0	0	0	0	0	0	0	0	0	0	0	0	0	0	0	0	0	0	0	0	0	0	0	0	0	0	0	0	0	0	0	0	0	0	0	0	0	0	0	0
SRR7284713	ULBRA-SA240	Flock Environment (Broilers)	environment	2017	Salmonella enterica	enterica	Heidelberg	Heidelberg	>>>>>>>>>>>>	0	0	0	0	0	0	0	0	0	0	0	0	0	0	0	0	0	0	0	0	0	0	0	0	0	0	0	0	0	0	0	0	0	0	0	0	0	0	0	0
SRR7284811	ULBRA-SA250	Feces (Broilers)	clinical-animal	2017	Salmonella enterica	enterica	Heidelberg	Heidelberg	>>>>>>>>>>>>	0	0	0	0	0	0	0	0	0	0	0	0	0	0	0	0	0	0	0	0	0	0	0	0	0	0	1	0	0	0	0	0	0	0	0	0	0	0	0	0
SRR7284821	ULBRA-SA226	Flock Environment (Broilers)	environment	2017	Salmonella enterica	enterica	Heidelberg	Heidelberg	>>>>>>>>>>>>	0	0	0	0	0	0	0	0	0	0	0	0	0	0	0	0	0	0	0	0	0	0	0	0	0	1	0	0	0	0	0	0	0	0	0	0	0	0	0	0
SRR7284850	RS-SF01623/15	Mayonnaise Salad	animal-based food	2015	Salmonella enterica	enterica	Enteritidis	Enteritidis	>>>>>>>>>>>>	0	0	0	0	0	0	0	0	0	0	0	0	0	0	0	0	0	0	0	0	0	0	0	0	0	0	0	0	0	0	0	0	0	0	0	0	0	0	0	0
SRR7284854	ULBRA-SA078	Flock Environment (Breeders)	environment	2014	Salmonella enterica	enterica	Enteritidis	Enteritidis	>>>>>>>>>>>>	0	0	0	0	0	0	0	0	0	0	0	0	0	0	0	0	0	0	0	0	0	0	0	0	0	0	0	0	0	0	0	0	0	0	0	0	0	0	0	0
SRR7284860	RS-SF16364/13	Mayonnaise Salad	animal-based food	2013	Salmonella enterica	enterica	Enteritidis	Enteritidis	>>>>>>>>>>>>	0	0	0	0	0	0	0	0	0	0	0	0	0	0	0	0	0	0	0	0	0	0	0	0	0	0	0	0	0	0	0	0	0	0	0	0	0	0	0	0
SRR7284864	RS-SF00996/12	vegetables	food	2012	Salmonella enterica	enterica	Enteritidis	Enteritidis	>>>>>>>>>>>>	0	0	0	0	0	0	0	0	0	0	0	0	0	0	0	0	0	0	0	0	0	0	0	0	0	0	0	0	0	0	0	0	0	0	0	0	0	0	0	0
SRR7284877	RS-SF18098/13	beef	animal-based food	2013	Salmonella enterica	enterica	Enteritidis	Enteritidis	>>>>>>>>>>>>	0	0	0	0	0	0	0	0	0	0	0	0	0	0	0	0	0	0	0	0	0	0	0	0	0	0	0	0	0	0	0	0	0	0	0	0	0	0	0	0
SRR8177009	ULBRA-SA062	Poultry Flock	animal-based food	2014	Salmonella enterica	enterica	Typhimurium	Typhimurium	>>>>>>>>>>>>	0	0	0	0	0	0	0	0	0	0	0	0	0	0	0	0	0	0	0	0	0	0	0	0	0	0	0	0	0	0	0	0	0	0	0	0	0	0	0	0
SRR8177011	ULBRA-SA061	Poultry Flock	animal-based food	2014	Salmonella enterica	enterica	Gallinarum	Gallinarum	>>>>>>>>>>>>	0	0	0	0	0	0	0	0	0	0	0	0	0	0	0	0	0	0	0	0	0	0	0	0	0	0	0	0	0	0	0	0	0	0	0	0	0	0	0	0
SRR8177012	ULBRA-SA236	Feces (Broilers)	clinical-animal	2017	Salmonella enterica	enterica	Heidelberg	Livingstone	>>>>>>>>>>>>	0	0	0	1	0	0	0	0	0	0	0	0	1	0	0	0	0	0	0	0	0	0	0	0	0	0	0	0	0	0	1	0	0	0	0	0	0	0	0	0
SRR8177014	ULBRA-SA170	Flock Environment (Broilers)	environment	2015	Salmonella enterica	enterica	Heidelberg	Heidelberg	>>>>>>>>>>>>	0	0	0	0	0	0	0	0	0	0	0	0	0	0	0	0	0	0	0	0	0	0	0	0	0	1	0	0	0	0	0	0	0	0	0	0	0	0	0	0
SRR8177015	ULBRA-SA231	Flock Environment (Broilers)	environment	2017	Salmonella enterica	enterica	Heidelberg	Heidelberg	>>>>>>>>>>>>	0	0	0	0	0	0	0	0	0	0	0	0	0	0	0	0	0	0	0	0	0	0	0	0	0	1	0	0	0	0	0	0	0	0	0	0	0	0	0	0
SRR8177017	ULBRA-SA251	Flock Environment (Broilers)	environment	2017	Salmonella enterica	enterica	Heidelberg	Heidelberg	>>>>>>>>>>>>	0	0	0	0	0	0	0	0	0	0	0	0	0	0	0	0	0	0	0	0	0	0	0	0	0	1	0	0	0	0	0	0	0	0	0	0	0	0	0	0
SRR8177019	ULBRA-SA239	Flock Environment (Broilers)	environment	2017	Salmonella enterica	enterica	Heidelberg	Heidelberg	>>>>>>>>>>>>	0	0	0	0	0	0	0	0	0	0	0	0	0	0	0	0	0	0	0	0	0	0	0	0	0	0	0	0	0	0	0	0	0	0	0	0	0	0	0	0
SRR8177020	ULBRA-SA197	Flock Environment (Broilers)	environment	2016	Salmonella enterica	enterica	Heidelberg	Heidelberg	>>>>>>>>>>>>	0	0	0	0	0	0	0	0	0	0	0	0	0	0	0	0	0	0	0	0	0	0	0	0	0	1	0	0	0	0	0	0	0	0	0	0	0	0	0	0
SRR8177021	ULBRA-SA155	Feces	clinical-animal	2015	Salmonella enterica	enterica	Enteritidis	Enteritidis	>>>>>>>>>>>>	0	0	0	0	0	0	0	0	0	0	0	0	0	0	0	0	0	0	0	0	0	0	0	0	0	0	0	0	0	0	0	0	0	0	0	0	0	0	0	0
SRR8177023	ULBRA-SA071	Poultry Flock	animal-based food	2014	Salmonella enterica	enterica	Gallinarum	Gallinarum	>>>>>>>>>>>>	0	0	0	0	0	0	0	0	0	0	0	0	0	0	0	0	0	0	0	0	0	0	0	0	0	0	0	0	0	0	0	0	0	0	0	0	0	0	0	0
SRR8177024	ULBRA-SA174	Flock Environment (Broilers)	environment	2015	Salmonella enterica	enterica	Heidelberg	Heidelberg	>>>>>>>>>>>>	0	0	0	0	0	0	0	0	0	0	0	0	0	0	0	0	0	0	0	0	0	0	0	0	0	1	0	0	0	0	0	0	0	0	0	0	0	0	0	0
SRR8177026	ULBRA-SA228	Feces (Broilers)	clinical-animal	2017	Salmonella enterica	enterica	Heidelberg	Heidelberg	>>>>>>>>>>>>	0	0	0	0	0	0	0	0	0	0	0	0	0	0	0	0	0	0	0	0	0	0	0	0	0	1	0	0	0	0	0	0	0	0	0	0	0	0	0	0
SRR8177027	ULBRA-SA237	Feces (Broilers)	clinical-animal	2017	Salmonella enterica	enterica	Heidelberg	Heidelberg	>>>>>>>>>>>>	0	0	0	0	0	0	0	0	0	0	0	0	0	0	0	0	0	0	0	0	0	0	0	0	0	1	0	0	0	0	0	0	0	0	0	0	0	0	0	0
SRR8177028	ULBRA-SA230	Flock Environment (Broilers)	environment	2017	Salmonella enterica	enterica	Heidelberg	Heidelberg	>>>>>>>>>>>>	0	0	0	0	0	0	0	0	0	0	0	0	0	0	0	0	0	0	0	0	0	0	0	0	0	1	0	0	0	0	0	0	0	0	0	0	0	0	0	0
SRR8177031	ULBRA-SA145	Organ (Liver) (Layers)	clinical-animal	2015	Salmonella enterica	enterica	Gallinarum	Gallinarum	>>>>>>>>>>>>	0	0	0	0	0	0	0	0	0	0	0	0	0	0	0	0	0	0	0	0	0	0	0	0	0	0	0	0	0	0	0	0	0	0	0	0	0	0	0	0
SRR8177032	ULBRA-SA068	Feces	clinical-animal	2014	Salmonella enterica	enterica	Enteritidis	Enteritidis	>>>>>>>>>>>>	0	0	0	0	0	0	0	0	0	0	0	0	0	0	0	0	0	0	0	0	0	0	0	0	0	0	0	0	0	0	0	0	0	0	0	0	0	0	0	0
SRR8177033	ULBRA-SA225	Flock Environment (Broilers)	environment	2017	Salmonella enterica	enterica	Heidelberg	Heidelberg	>>>>>>>>>>>>	0	0	0	0	0	0	0	0	0	0	0	0	0	0	0	0	0	0	0	0	0	0	0	0	0	1	0	0	0	0	0	0	0	0	0	0	0	0	0	0
SRR8177034	ULBRA-SA066	Poultry Flock	animal-based food	2014	Salmonella enterica	enterica	Typhimurium	Typhimurium	>>>>>>>>>>>>	0	0	0	0	0	0	0	0	0	0	0	0	0	0	0	0	0	0	0	0	0	0	0	0	0	0	0	0	0	0	0	0	0	0	0	0	0	0	0	0
SRR8177035	ULBRA-SA253	Flock Environment (Broilers)	environment	2016	Salmonella enterica	enterica	Typhimurium	Typhimurium	>>>>>>>>>>>>	0	0	0	0	0	0	0	1	0	0	1	0	0	0	0	0	0	0	0	0	0	0	0	0	0	0	0	0	0	0	0	0	0	0	0	0	0	0	0	0
SRR8177036	ULBRA-SA053	Feces	clinical-animal	2014	Salmonella enterica	enterica	Enteritidis	Enteritidis	>>>>>>>>>>>>	0	0	0	0	0	0	0	0	0	0	0	0	0	0	0	0	0	0	0	0	0	0	0	0	0	0	0	0	0	0	0	0	0	0	0	0	0	0	0	0
SRR8177041	ULBRA-SA211	Poultry Flock Bacterial Culture (Breeders)	clinical-animal	2017	Salmonella enterica	enterica	Typhimurium	Typhimurium	>>>>>>>>>>>>	0	0	0	0	0	0	0	1	0	0	1	0	0	0	0	0	0	0	0	0	0	0	0	0	0	0	0	0	0	0	0	0	0	0	0	0	0	0	0	0
SRR8177042	ULBRA-SA052	Feces	clinical-animal	2014	Salmonella enterica	enterica	Enteritidis	Enteritidis	>>>>>>>>>>>>	0	0	0	0	0	0	0	0	0	0	0	0	0	0	0	0	0	0	0	0	0	0	0	0	0	0	0	0	0	0	0	0	0	0	0	0	0	0	0	0
SRR8177043	ULBRA-SA013	Viscera (Breeders)	clinical-animal	2014	Salmonella enterica	enterica	Gallinarum	Gallinarum	>>>>>>>>>>>>	0	0	0	0	0	0	0	0	0	0	0	0	0	0	0	0	0	0	0	0	0	0	0	0	0	0	0	0	0	0	0	0	0	0	0	0	0	0	0	0
SRR8177045	ULBRA-SA241	Flock Environment (Broilers)	environment	2017	Salmonella enterica	enterica	Heidelberg	Heidelberg	>>>>>>>>>>>>	0	0	0	0	0	0	0	0	0	0	0	0	0	0	0	0	0	0	0	0	0	0	0	0	0	1	0	0	0	0	0	0	0	0	0	0	0	0	0	0
SRR8177046	ULBRA-SA227	Feces (Broilers)	clinical-animal	2017	Salmonella enterica	enterica	Heidelberg	Heidelberg	>>>>>>>>>>>>	0	0	0	0	0	0	0	0	0	0	0	0	0	0	0	0	0	0	0	0	0	0	0	0	0	1	0	0	0	0	0	0	0	0	0	0	0	0	0	0
SRR8177047	ULBRA-SA235	Feces (Broilers)	clinical-animal	2017	Salmonella enterica	enterica	Heidelberg	Heidelberg	>>>>>>>>>>>>	0	0	0	0	0	0	0	0	0	0	0	0	0	0	0	0	0	0	0	0	0	0	0	0	0	1	0	0	0	0	0	0	0	0	0	0	0	0	0	0
SRR8177049	RS-SF00022/10	Mayonnaise Salad	animal-based food	2010	Salmonella enterica	enterica	Enteritidis	Enteritidis	>>>>>>>>>>>>	0	0	0	0	0	0	0	0	0	0	0	0	0	0	0	0	0	0	0	0	0	0	0	0	0	0	0	0	0	0	0	0	0	0	0	0	0	0	0	0
SRR8177050	ULBRA-SA244	Meconium (Breeders)	clinical-animal	2017	Salmonella enterica	enterica	Heidelberg	Heidelberg	>>>>>>>>>>>>	0	0	0	0	0	0	0	0	0	0	0	0	0	0	0	0	0	0	0	0	0	0	0	0	0	1	0	0	0	0	0	0	0	0	0	0	0	0	0	0
SRR8177051	ULBRA-SA198	Flock Environment (Broilers)	environment	2016	Salmonella enterica	enterica	Heidelberg	Heidelberg	>>>>>>>>>>>>	0	0	0	0	0	0	0	0	0	0	0	0	0	0	0	0	0	0	0	0	0	0	0	0	0	1	0	0	0	0	0	0	0	0	0	0	0	0	0	0
SRR8177052	ULBRA-SA259	Organ (Layers)	clinical-animal	2017	Salmonella enterica	enterica	Gallinarum	Gallinarum	>>>>>>>>>>>>	0	0	0	0	0	0	0	0	0	0	0	0	0	0	0	0	0	0	0	0	0	0	0	0	0	0	0	0	0	0	0	0	0	0	0	0	0	0	0	0
SRR8177053	RS-SF03447/10	Mayonnaise Salad	animal-based food	2010	Salmonella enterica	enterica	Enteritidis	Enteritidis	>>>>>>>>>>>>	0	0	0	0	0	0	0	0	0	0	0	0	0	0	0	0	0	0	0	0	0	0	0	0	0	0	0	0	0	0	0	0	0	0	0	0	0	0	0	0
SRR8177054	ULBRA-SA213	Poultry Flock Bacterial Culture (Breeders)	clinical-animal	2017	Salmonella enterica	enterica	Gallinarum	Gallinarum	>>>>>>>>>>>>	0	0	0	0	0	0	0	0	0	0	0	0	0	0	0	0	0	0	0	0	0	0	0	0	0	0	0	0	0	0	0	0	0	0	0	0	0	0	0	0
SRR8177057	RS-SF15382/10	Mayonnaise Salad	animal-based food	2010	Salmonella enterica	enterica	Enteritidis	Enteritidis	>>>>>>>>>>>>	0	0	0	0	0	0	0	0	0	0	0	0	0	0	0	0	0	0	0	0	0	0	0	0	0	0	0	0	0	0	0	0	0	0	0	0	0	0	0	0
SRR8177058	ULBRA-SA242	Flock Environment (Broilers)	environment	2016	Salmonella enterica	enterica	Heidelberg	Heidelberg	>>>>>>>>>>>>	0	0	0	0	0	0	0	0	0	0	0	0	0	0	0	0	0	0	0	0	0	0	0	0	0	1	0	0	0	0	0	0	0	0	0	0	0	0	0	0
SRR8177060	ULBRA-SA256	Flock Environment (Broilers)	environment	2017	Salmonella enterica	enterica	Typhimurium	Typhimurium	>>>>>>>>>>>>	0	0	0	0	0	1	0	0	0	0	0	0	0	0	1	0	0	0	0	0	0	1	0	0	0	0	0	0	0	0	0	0	0	0	0	1	0	0	0	0
SRR8177061	ULBRA-SA243	Feces (Broilers)	clinical-animal	2017	Salmonella enterica	enterica	Heidelberg	Heidelberg	>>>>>>>>>>>>	0	0	0	0	0	0	0	0	0	0	0	0	0	0	0	0	0	0	0	0	0	0	0	0	0	1	0	0	0	0	0	0	0	0	0	0	0	0	0	0
SRR8177063	ULBRA-SA210	Poultry Flock Bacterial Culture (Breeders)	clinical-animal	2017	Salmonella enterica	enterica	Typhimurium	Typhimurium	>>>>>>>>>>>>	0	0	0	0	0	0	0	1	0	0	1	0	0	0	0	0	0	0	0	0	0	0	0	0	0	0	0	0	0	0	0	0	0	0	0	0	0	0	0	0
SRR8177064	ULBRA-SA248	Flock Environment (Broilers)	environment	2017	Salmonella enterica	enterica	Heidelberg	Heidelberg	>>>>>>>>>>>>	0	0	0	0	0	0	0	0	0	0	0	0	0	0	0	0	0	0	0	0	0	0	0	0	0	1	0	0	0	0	0	0	0	0	0	0	0	0	0	0
SRR8177065	ULBRA-SA009	Flock Environment (Breeders)	environment	2014	Salmonella enterica	enterica	Enteritidis	Enteritidis	>>>>>>>>>>>>	0	0	0	0	0	0	0	0	0	0	0	0	0	0	0	0	0	0	0	0	0	0	0	0	0	0	0	0	0	0	0	0	0	0	0	0	0	0	0	0
SRR8177066	ULBRA-SA185	Flock Environment (Broilers)	environment	2016	Salmonella enterica	enterica	Heidelberg	Heidelberg	>>>>>>>>>>>>	0	0	0	0	0	0	0	0	0	0	0	0	0	0	0	0	0	0	0	0	0	0	0	0	0	1	0	0	0	0	0	0	0	0	0	0	0	0	0	0
SRR8177067	RS-SF11293/10	beef	animal-based food	2010	Salmonella enterica	enterica	Enteritidis	Enteritidis	>>>>>>>>>>>>	0	0	0	0	0	0	0	0	0	0	0	0	0	0	0	0	0	0	0	0	0	0	0	0	0	0	0	0	0	0	0	0	0	0	0	0	0	0	0	0
SRR8177068	ULBRA-SA217	Flock Environment (Breeders)	environment	2017	Salmonella enterica	enterica	Typhimurium	Typhimurium	>>>>>>>>>>>>	0	0	0	0	0	0	0	1	0	0	1	0	0	0	0	0	0	0	0	0	0	0	0	0	0	0	0	0	0	0	0	0	0	0	1	0	0	0	0	0
SRR8177069	RS-SF00434/10	Pie	food	2010	Salmonella enterica	enterica	Enteritidis	Enteritidis	>>>>>>>>>>>>	0	0	0	0	0	0	0	0	0	0	0	0	0	0	0	0	0	0	0	0	0	0	0	0	0	0	0	0	0	0	0	0	0	0	0	0	0	0	0	0
SRR8177070	ULBRA-SA209	Poultry Flock Bacterial Culture (Breeders)	clinical-animal	2017	Salmonella enterica	enterica	Typhimurium	I 1,4,[5],12:i:-	>>>>>>>>>>>>	0	0	0	0	0	0	0	0	0	0	0	0	0	0	0	0	0	0	0	0	0	0	0	0	0	0	0	0	0	0	0	0	0	0	0	0	0	0	0	0
SRR8177071	ULBRA-SA218	Organ (Layers)	clinical-animal	2017	Salmonella enterica	enterica	Gallinarum	Gallinarum	>>>>>>>>>>>>	0	0	0	0	0	0	0	0	0	0	0	0	0	0	0	0	0	0	0	0	0	0	0	0	0	0	0	0	0	0	0	0	0	0	0	0	0	0	0	0
SRR8177072	ULBRA-SA186	Flock Environment (Broilers)	environment	2016	Salmonella enterica	enterica	Heidelberg	Heidelberg	>>>>>>>>>>>>	0	0	0	0	0	0	0	0	0	0	0	0	0	0	0	0	0	0	0	0	0	0	0	0	0	1	0	0	0	0	0	0	0	0	0	0	0	0	0	0
SRR8177073	ULBRA-SA181	Poultry Flock	animal-based food	2015	Salmonella enterica	enterica	Heidelberg	Heidelberg	>>>>>>>>>>>>	0	0	0	0	0	0	0	0	0	0	0	0	0	0	0	0	0	0	0	0	0	0	0	0	0	0	0	0	0	0	0	0	0	0	0	0	0	0	0	0
SRR8177074	RS-SF12874/10	Cake	food	2010	Salmonella enterica	enterica	Enteritidis	Enteritidis	>>>>>>>>>>>>	0	0	0	0	0	0	0	0	0	0	0	0	0	0	0	0	0	0	0	0	0	0	0	0	0	0	0	0	0	0	0	0	0	0	0	0	0	0	0	0
SRR8177075	ULBRA-SA219	Organ (Layers)	clinical-animal	2017	Salmonella enterica	enterica	Gallinarum	Gallinarum	>>>>>>>>>>>>	0	0	0	0	0	0	0	0	0	0	0	0	0	0	0	0	0	0	0	0	0	0	0	0	0	0	0	0	0	0	0	0	0	0	0	0	0	0	0	0
SRR8291802	CFSAN034670	swab swine carcass	animal-based food	2004	Salmonella enterica	enterica	Typhimurium	Senftenberg	>>>>>>>>>>>>	0	0	0	0	0	0	0	0	0	0	0	0	0	0	0	0	0	0	0	0	0	0	0	0	1	0	0	0	0	0	0	0	0	0	0	0	0	0	0	0
SRR8291805	CFSAN034669	swine feces	clinical-animal	2004	Salmonella enterica	enterica	Typhimurium	Orion	>>>>>>>>>>>>	0	0	0	0	0	0	0	0	0	0	0	0	0	0	0	0	0	0	0	0	0	0	0	0	0	0	0	0	0	0	0	0	0	0	0	0	0	0	0	0
SRR8291806	CFSAN034672	swine urine	clinical-animal	2011	Salmonella enterica	enterica	Typhimurium	Typhimurium	>>>>>>>>>>>>	0	0	1	0	0	1	0	1	1	0	1	0	0	0	1	0	0	0	0	0	1	1	0	0	0	0	0	0	0	0	0	0	0	0	1	0	0	0	0	0
SRR8291813	CFSAN034668	swine feces	clinical-animal	2003	Salmonella enterica	enterica	Typhimurium	Typhimurium	>>>>>>>>>>>>	0	0	0	0	0	0	1	1	0	1	1	0	0	0	0	0	0	0	0	0	0	0	0	0	0	0	0	0	0	0	0	0	0	0	0	0	0	0	0	0
SRR8291817	CFSAN034671	swine feces	clinical-animal	2004	Salmonella enterica	enterica	Typhimurium	Senftenberg	>>>>>>>>>>>>	0	0	0	0	0	0	0	0	0	0	0	0	0	0	0	0	0	0	0	0	0	0	0	0	0	0	0	0	0	0	0	0	0	0	0	0	0	0	0	0
SRR8508313	ULBRA-SF334	Raw chicken	animal-based food	2017	Salmonella enterica	enterica	Heidelberg	Heidelberg	>>>>>>>>>>>>	0	0	0	0	0	0	0	0	0	0	0	0	0	0	0	0	0	0	0	0	0	0	0	0	0	1	0	0	0	0	0	0	0	0	0	0	0	0	0	0
SRR8508314	ULBRA-SF343	Raw chicken	animal-based food	2017	Salmonella enterica	enterica	Heidelberg	Heidelberg	>>>>>>>>>>>>	0	0	0	0	0	0	0	0	0	0	0	0	0	0	0	0	0	0	0	0	0	0	0	0	0	1	0	0	0	0	0	0	0	0	0	0	0	0	0	0
SRR8508315	ULBRA-SA388	flock environment	environment	2018	Salmonella enterica	enterica	Heidelberg	Heidelberg	>>>>>>>>>>>>	0	0	0	0	0	0	0	0	0	0	0	0	0	0	0	0	0	0	0	0	0	0	0	0	0	1	0	0	0	0	0	0	0	0	0	0	0	0	0	0
SRR8508316	ULBRA-SA389	slaughterhouse	environment	2018	Salmonella enterica	enterica	Heidelberg	Heidelberg	>>>>>>>>>>>>	0	0	0	0	0	0	0	0	0	0	0	0	0	0	0	0	0	0	0	0	0	0	0	0	0	1	0	0	0	0	0	0	0	0	0	0	0	0	0	0
SRR8508317	ULBRA-SA386	flock environment	environment	2018	Salmonella enterica	enterica	Heidelberg	Heidelberg	>>>>>>>>>>>>	0	0	0	0	0	0	0	0	0	0	0	0	0	0	0	0	0	0	0	0	0	0	0	0	0	1	0	0	0	0	0	0	0	0	0	0	0	0	0	0
SRR8508318	ULBRA-SA387	flock environment	environment	2018	Salmonella enterica	enterica	Heidelberg	Heidelberg	>>>>>>>>>>>>	0	0	0	0	0	0	0	0	0	0	0	0	0	0	0	0	0	0	0	0	0	0	0	0	0	1	0	0	0	0	0	0	0	0	0	0	0	0	0	0
SRR8508319	ULBRA-SF327	Raw chicken	animal-based food	2015	Salmonella enterica	enterica	Heidelberg	Heidelberg	>>>>>>>>>>>>	0	0	0	0	0	0	0	0	0	0	0	0	0	0	0	0	0	0	0	0	0	0	0	0	0	1	0	0	0	0	0	0	0	0	0	0	0	0	0	0
SRR8508320	ULBRA-SF328	Raw chicken	animal-based food	2015	Salmonella enterica	enterica	Heidelberg	Heidelberg	>>>>>>>>>>>>	0	0	0	0	0	0	0	0	0	0	0	0	0	0	0	0	0	0	0	0	0	0	0	0	0	1	0	0	0	0	0	0	0	0	0	0	0	0	0	0
SRR8508321	NC_SN145	chicken carcass	animal-based food	2016	Salmonella enterica	enterica	Newport	Minnesota	>>>>>>>>>>>>	0	0	0	0	0	1	0	0	0	0	0	0	0	0	0	0	0	0	0	0	0	0	0	0	0	1	0	0	0	0	0	1	0	0	0	0	0	0	0	0
SRR8508322	NC_SN144	Chiken carcass	animal-based food	2016	Salmonella enterica	enterica	Newport	Minnesota	>>>>>>>>>>>>	0	0	0	0	0	1	0	0	0	0	0	0	0	0	0	0	0	0	0	0	0	0	0	0	0	1	0	0	0	0	0	1	0	0	0	0	0	0	0	0
SRR8508323	ULBRA-SA390	slaughterhouse	environment	2018	Salmonella enterica	enterica	Heidelberg	Heidelberg	>>>>>>>>>>>>	0	0	0	0	0	0	0	0	0	0	0	0	0	0	0	0	0	0	0	0	0	0	0	0	0	1	0	0	0	0	0	0	0	0	0	0	0	0	0	0
SRR8508324	ULBRA-SA391	slaughterhouse	environment	2018	Salmonella enterica	enterica	Heidelberg	Heidelberg	>>>>>>>>>>>>	0	0	0	0	0	0	0	0	0	0	0	0	0	0	0	0	0	0	0	0	0	0	0	0	0	1	0	0	0	0	0	0	0	0	0	0	0	0	0	0
SRR8508325	ULBRA-SA373	flock environment	environment	2018	Salmonella enterica	enterica	Heidelberg	Heidelberg	>>>>>>>>>>>>	0	0	0	0	0	0	0	0	0	0	0	0	0	0	0	0	0	0	0	0	0	0	0	0	0	0	0	0	0	0	0	0	0	0	0	0	0	0	0	0
SRR8508326	ULBRA-SA378	flock environment	environment	2018	Salmonella enterica	enterica	Heidelberg	Heidelberg	>>>>>>>>>>>>	0	0	0	0	0	0	0	0	0	0	0	0	0	0	0	0	0	0	0	0	0	0	0	0	0	1	0	0	0	0	0	0	0	0	0	0	0	0	0	0
SRR8508327	ULBRA-SA379	slaughterhouse	environment	2018	Salmonella enterica	enterica	Heidelberg	Heidelberg	>>>>>>>>>>>>	0	0	0	0	0	0	0	0	0	0	0	0	0	0	0	0	0	0	0	0	0	0	0	0	0	0	0	0	0	0	0	0	0	0	0	0	0	0	0	0
SRR8508328	ULBRA-SA380	slaughterhouse	environment	2018	Salmonella enterica	enterica	Heidelberg	Heidelberg	>>>>>>>>>>>>	0	0	0	0	0	0	0	0	0	0	0	0	0	0	0	0	0	0	0	0	0	0	0	0	0	1	0	0	0	0	0	0	0	0	0	0	0	0	0	0
SRR8508329	ULBRA-SA381	slaughterhouse	environment	2018	Salmonella enterica	enterica	Heidelberg	Heidelberg	>>>>>>>>>>>>	0	0	0	0	0	0	0	0	0	0	0	0	0	0	0	0	0	0	0	0	0	0	0	0	0	1	0	0	0	0	0	0	0	0	0	0	0	0	0	0
SRR8508330	ULBRA-SA382	slaughterhouse	environment	2018	Salmonella enterica	enterica	Heidelberg	Heidelberg	>>>>>>>>>>>>	0	0	0	0	0	0	0	0	0	0	0	0	0	0	0	0	0	0	0	0	0	0	0	0	0	1	0	0	0	0	0	0	0	0	0	0	0	0	0	0
SRR8508331	ULBRA-SA383	slaughterhouse	environment	2018	Salmonella enterica	enterica	Heidelberg	Heidelberg	>>>>>>>>>>>>	0	0	0	0	0	0	0	0	0	0	0	0	0	0	0	0	0	0	0	0	0	0	0	0	0	1	0	0	0	0	0	0	0	0	0	0	0	0	0	0
SRR8508332	ULBRA-SA385	flock environment	environment	2018	Salmonella enterica	enterica	Heidelberg	Heidelberg	>>>>>>>>>>>>	0	0	0	0	0	0	0	0	0	0	0	0	0	0	0	0	0	0	0	0	0	0	0	0	0	0	0	0	0	0	0	1	0	0	0	0	0	0	0	0
SRR8519233	ULBRA-SA372	flock environment	environment	2018	Salmonella enterica	enterica	Heidelberg	Heidelberg	>>>>>>>>>>>>	0	0	0	0	0	0	0	0	0	0	0	0	0	0	0	0	0	0	0	0	0	0	0	0	0	1	0	0	0	0	0	0	0	0	0	0	0	0	0	0
SRR8519235	ULBRA-SA366	flock environment	environment	2018	Salmonella enterica	enterica	Heidelberg	Heidelberg	>>>>>>>>>>>>	0	0	0	0	0	0	0	0	0	0	0	0	0	0	0	0	0	0	0	0	0	0	0	0	0	0	0	0	0	0	0	0	0	0	0	0	0	0	0	0
SRR8519240	ULBRA-SA367	flock environment	environment	2018	Salmonella enterica	enterica	Heidelberg	Heidelberg	>>>>>>>>>>>>	0	0	0	0	0	0	0	0	0	0	0	0	0	0	0	0	0	0	0	0	0	0	0	0	0	1	0	0	0	0	0	0	0	0	0	0	0	0	0	0
SRR8519241	ULBRA-SA371	flock environment	environment	2018	Salmonella enterica	enterica	Heidelberg	Heidelberg	>>>>>>>>>>>>	0	0	0	0	0	0	0	0	0	0	0	0	0	0	0	0	0	0	0	0	0	0	0	0	0	1	0	0	0	0	0	0	0	0	0	0	0	0	0	0
SRR8519242	UFRGS-SA007	Lymph nodes	clinical-animal	1999	Salmonella enterica	enterica	Enteritidis	Enteritidis	>>>>>>>>>>>>	0	0	0	0	0	0	0	0	0	0	0	0	0	0	0	0	0	0	0	0	0	0	0	0	0	0	0	0	0	0	0	0	0	0	0	0	0	0	0	0
SRR8519245	ULBRA-SA365	flock environment	environment	2017	Salmonella enterica	enterica	Heidelberg	Heidelberg	>>>>>>>>>>>>	0	0	0	0	0	0	0	0	0	0	0	0	0	0	0	0	0	0	0	0	0	0	0	0	0	1	0	0	0	0	0	0	0	0	0	0	0	0	0	0
SRR8519246	UFRGS-SA034	Sausage	animal-based food	2005	Salmonella enterica	enterica	Typhimurium	Typhimurium	>>>>>>>>>>>>	0	1	0	0	0	0	0	0	0	0	0	0	0	0	1	0	0	0	0	0	0	1	0	0	0	0	0	0	0	0	0	0	0	0	0	1	0	0	0	0
SRR8520085	ULBRA-SA362	flock environment	environment	2018	Salmonella enterica	enterica	Heidelberg	Heidelberg	>>>>>>>>>>>>	0	0	0	0	0	0	0	0	0	0	0	0	0	0	0	0	0	0	0	0	0	0	0	0	0	1	0	0	0	0	0	0	0	0	0	0	0	0	0	0
SRR8520086	ULBRA-SA361	slaughterhouse	environment	2018	Salmonella enterica	enterica	Heidelberg	Heidelberg	>>>>>>>>>>>>	0	0	0	0	0	0	0	0	0	0	0	0	0	0	0	0	0	0	0	0	0	0	0	0	0	0	0	0	0	0	0	0	0	0	0	0	0	0	0	0
SRR8520087	ULBRA-SA363	flock environment	environment	2018	Salmonella enterica	enterica	Heidelberg	Heidelberg	>>>>>>>>>>>>	0	0	0	0	0	0	0	0	0	0	0	0	0	0	0	0	0	0	0	0	0	0	0	0	0	1	0	0	0	0	0	0	0	0	0	0	0	0	0	0
SRR8520090	UFRGS-SA033	Sausage	animal-based food	2005	Salmonella enterica	enterica	Typhimurium	Typhimurium	>>>>>>>>>>>>	0	0	0	0	0	0	0	1	0	0	1	0	0	0	0	0	0	0	0	0	0	0	0	0	0	0	0	0	0	0	0	0	0	0	0	0	0	0	0	0
SRR8520092	ULBRA-SA364	flock environment	environment	2017	Salmonella enterica	enterica	Heidelberg	Heidelberg	>>>>>>>>>>>>	0	0	0	0	0	0	0	0	0	0	0	0	0	0	0	0	0	0	0	0	0	0	0	0	0	1	0	0	0	0	0	0	0	0	0	0	0	0	0	0
SRR8520093	ULBRA-SA360	slaughterhouse	environment	2018	Salmonella enterica	enterica	Heidelberg	Heidelberg	>>>>>>>>>>>>	0	0	0	0	0	0	0	0	0	0	0	0	0	0	0	0	0	0	0	0	0	0	0	0	0	1	0	0	0	0	0	0	0	0	0	0	0	0	0	0
SRR8520094	UFRGS-SA008	Lymph nodes	clinical-animal	2000	Salmonella enterica	enterica	Enteritidis	Enteritidis	>>>>>>>>>>>>	0	0	0	0	0	0	0	0	0	0	0	0	0	0	0	0	0	0	0	0	0	0	0	0	0	0	0	0	0	0	0	0	0	0	0	0	0	0	0	0
SRR8520095	UFRGS-SA009	Lymph nodes	clinical-animal	2000	Salmonella enterica	enterica	Enteritidis	Enteritidis	>>>>>>>>>>>>	0	0	1	0	0	0	0	1	1	0	1	0	0	0	0	0	0	0	0	0	0	0	0	0	0	0	0	0	0	0	0	0	0	0	0	0	0	0	0	0
SRR8520096	UFRGS-SA035	Sausage	clinical-animal	2005	Salmonella enterica	enterica	Typhimurium	Typhimurium	>>>>>>>>>>>>	0	0	1	0	0	0	0	0	1	0	0	0	0	0	0	0	0	0	0	0	0	0	0	0	0	0	0	0	0	0	0	0	0	0	0	1	0	0	0	0
SRR8520097	UFRGS-SA031	Fresh Sausage Production	animal-based food	2001	Salmonella enterica	enterica	Typhimurium	Typhimurium	>>>>>>>>>>>>	0	0	0	0	0	0	0	0	0	0	0	0	0	1	0	1	0	0	0	0	0	0	0	1	0	0	0	0	0	0	0	0	0	0	0	0	0	0	0	0
SRR8520099	UFRGS-SA038	Carcasses (Swine)	animal-based food	2008	Salmonella enterica	enterica	Typhimurium	Typhimurium	>>>>>>>>>>>>	0	0	1	0	0	0	0	0	1	0	0	0	1	0	1	0	0	0	0	0	0	0	0	0	0	0	0	0	0	0	0	0	0	0	0	1	0	0	0	0
SRR8520100	UFRGS-SA037	Carcasses (Swine)	animal-based food	2007	Salmonella enterica	enterica	Typhimurium	Typhimurium	>>>>>>>>>>>>	0	0	1	0	0	0	0	0	1	0	0	0	0	0	1	0	0	0	0	0	0	0	0	0	0	0	0	0	0	0	0	0	0	0	0	1	0	0	0	0
SRR8520101	UFRGS-SA043	Carcasses (Swine)	animal-based food	2010	Salmonella enterica	enterica	Typhimurium	Typhimurium	>>>>>>>>>>>>	0	0	0	0	0	0	0	0	0	0	0	0	0	0	0	0	0	0	0	0	0	0	0	0	0	0	0	0	0	0	0	0	0	0	0	0	0	0	0	0
SRR8520102	UFRGS-SA039	Carcasses (Swine)	animal-based food	2008	Salmonella enterica	enterica	Typhimurium	Typhimurium	>>>>>>>>>>>>	0	0	0	0	0	0	0	1	0	0	1	0	0	0	0	0	0	0	0	0	0	0	0	0	0	0	0	0	0	0	0	0	0	0	0	0	0	0	0	0
SRR8520103	UFRGS-SA010	Lymph nodes	clinical-animal	2000	Salmonella enterica	enterica	Enteritidis	Enteritidis	>>>>>>>>>>>>	0	0	1	0	0	0	0	1	1	0	1	0	0	0	0	0	0	0	0	0	0	0	0	0	0	0	0	0	0	0	0	0	0	0	0	0	0	0	0	0
SRR8520104	ULBRA-SA344	slaughterhouse	environment	2014	Salmonella enterica	enterica	Heidelberg	Heidelberg	>>>>>>>>>>>>	0	0	0	0	0	0	0	0	0	0	0	0	0	0	0	0	0	0	0	0	0	0	0	0	0	1	0	0	0	0	0	0	0	0	0	0	0	0	0	0
SRR8520105	UFRGS-SA041	Carcasses (Swine)	animal-based food	2008	Salmonella enterica	enterica	Typhimurium	Typhimurium	>>>>>>>>>>>>	0	0	0	0	0	0	0	0	0	0	0	0	0	0	0	0	0	0	0	0	0	0	0	0	0	0	0	0	0	0	0	0	0	0	0	0	0	0	0	0
SRR8520106	UFRGS-SA045	Carcasses (Swine)	animal-based food	2010	Salmonella enterica	enterica	Typhimurium	Typhimurium	>>>>>>>>>>>>	0	0	0	0	0	0	0	0	0	0	0	0	0	0	0	0	0	0	0	0	0	0	0	0	0	0	0	0	0	0	0	0	0	0	0	0	0	0	0	0
SRR8520107	UFRGS-SA030	Fresh Sausage Production	animal-based food	2001	Salmonella enterica	enterica	Typhimurium	Typhimurium	>>>>>>>>>>>>	0	0	0	0	0	0	0	1	0	0	1	0	0	0	0	0	0	0	0	0	0	0	0	0	0	0	0	0	0	0	0	0	0	0	0	0	0	0	0	0
SRR8520108	UFRGS-SA040	Carcasses (Swine)	animal-based food	2008	Salmonella enterica	enterica	Typhimurium	Typhimurium	>>>>>>>>>>>>	0	0	0	0	0	0	0	1	0	0	1	0	0	0	0	0	0	0	0	0	0	0	0	0	0	0	0	0	0	0	0	0	0	0	0	0	0	0	0	0
SRR8520109	UFRGS-SA052	Carcasses (Swine)	animal-based food	2015	Salmonella enterica	enterica	Typhimurium	Typhimurium	>>>>>>>>>>>>	1	0	0	0	0	0	0	1	0	0	1	0	1	0	0	0	0	0	1	0	0	0	0	0	0	0	0	0	0	0	0	0	0	0	0	0	0	0	0	0
SRR8520110	UFRGS-SA050	Carcasses (Swine)	animal-based food	2015	Salmonella enterica	enterica	Typhimurium	Typhimurium	>>>>>>>>>>>>	0	0	0	0	0	0	0	0	0	0	0	0	0	0	1	0	0	0	0	0	0	1	0	0	0	0	0	0	0	0	0	0	0	0	0	1	0	0	0	0
SRR8520111	ULBRA-SA350	flock environment	environment	2014	Salmonella enterica	enterica	Heidelberg	Heidelberg	>>>>>>>>>>>>	0	0	0	0	0	0	0	0	0	0	0	0	0	0	0	0	0	0	0	0	0	0	0	0	0	0	0	0	0	0	0	0	0	0	0	0	0	0	0	0
SRR8520112	ULBRA-SA348	flock environment	environment	2014	Salmonella enterica	enterica	Heidelberg	Heidelberg	>>>>>>>>>>>>	0	0	0	0	0	0	0	0	0	0	0	0	0	0	0	0	0	0	0	0	0	0	0	0	0	1	0	0	0	0	0	0	0	0	0	0	0	0	0	0
SRR8520113	ULBRA-SA357	slaughterhouse	environment	2018	Salmonella enterica	enterica	Heidelberg	Heidelberg	>>>>>>>>>>>>	0	0	0	0	0	0	0	0	0	0	0	0	0	0	0	0	0	0	0	0	0	0	0	0	0	1	0	0	0	0	0	0	0	0	0	0	0	0	0	0
SRR8520140	ULBRA-SA358	slaughterhouse	environment	2018	Salmonella enterica	enterica	Heidelberg	Heidelberg	>>>>>>>>>>>>	0	0	0	0	0	0	0	0	0	0	0	0	0	0	0	0	0	0	0	0	0	0	0	0	0	0	0	0	0	0	0	0	0	0	0	0	0	0	0	0
SRR8520141	ULBRA-SA349	dead poultry	clinical-animal	2014	Salmonella enterica	enterica	Heidelberg	Heidelberg	>>>>>>>>>>>>	0	0	0	0	0	0	0	0	0	0	0	0	0	0	0	0	0	0	0	0	0	0	0	0	0	1	0	0	0	0	0	0	0	0	0	0	0	0	0	0
SRR8520142	UFRGS-SA046	Carcasses (Swine)	animal-based food	2010	Salmonella enterica	enterica	Typhimurium	Typhimurium	>>>>>>>>>>>>	0	0	0	0	0	0	0	0	0	0	0	0	0	0	1	0	0	0	0	0	0	1	0	0	0	0	0	0	0	0	0	0	0	0	0	1	0	0	0	0
SRR8520143	ULBRA-SA356	slaughterhouse	environment	2018	Salmonella enterica	enterica	Heidelberg	Heidelberg	>>>>>>>>>>>>	0	0	0	0	0	0	0	0	0	0	0	0	0	0	0	0	0	0	0	0	0	0	0	0	0	1	0	0	0	0	0	0	0	0	0	0	0	0	0	0
SRR8520144	ULBRA-SA354	slaughterhouse	environment	2018	Salmonella enterica	enterica	Heidelberg	Heidelberg	>>>>>>>>>>>>	0	0	0	0	0	0	0	0	0	0	0	0	0	0	0	0	0	0	0	0	0	0	0	0	0	1	0	0	0	0	0	0	0	0	0	0	0	0	0	0
SRR8520145	ULBRA-SA345	culture	clinical-animal	2014	Salmonella enterica	enterica	Heidelberg	Heidelberg	>>>>>>>>>>>>	0	0	0	0	0	0	0	0	0	0	0	0	0	0	0	0	0	0	0	0	0	0	0	0	0	1	0	0	0	0	0	0	0	0	0	0	0	0	0	0
SRR8520146	UFRGS-SA048	Salami	animal-based food	2012	Salmonella enterica	enterica	Typhimurium	Typhimurium	>>>>>>>>>>>>	0	0	0	0	0	0	0	1	0	0	1	0	0	0	0	0	0	0	0	0	0	0	0	0	0	0	0	0	0	0	0	0	0	0	1	0	0	0	0	0
SRR8520207	ULBRA-SA355	slaughterhouse	environment	2018	Salmonella enterica	enterica	Heidelberg	Heidelberg	>>>>>>>>>>>>	0	0	0	0	0	0	0	0	0	0	0	0	0	0	0	0	0	0	0	0	0	0	0	0	0	1	0	0	0	0	0	0	0	0	0	0	0	0	0	0
SRR8520208	ULBRA-SA359	slaughterhouse	environment	2018	Salmonella enterica	enterica	Heidelberg	Heidelberg	>>>>>>>>>>>>	0	0	0	0	0	0	0	1	0	0	1	0	0	0	0	0	0	0	0	1	0	0	0	0	0	1	0	0	0	0	0	0	0	0	0	1	0	0	0	0
SRR8520211	UFRGS-SA011	Lymph nodes	clinical-animal	2000	Salmonella enterica	enterica	Enteritidis	Enteritidis	>>>>>>>>>>>>	0	0	0	0	0	0	0	0	0	0	0	0	0	0	0	0	0	0	0	0	0	0	0	0	0	0	0	0	0	0	0	0	0	0	0	0	0	0	0	0
SRR8523064	RS-SF09687/13	Sausage	animal-based food	2013	Salmonella enterica	enterica	Typhimurium	Typhimurium	>>>>>>>>>>>>	1	0	0	0	0	1	0	0	0	0	0	0	0	0	0	0	0	0	0	0	0	0	0	0	0	0	0	0	0	0	0	0	0	0	0	1	0	0	0	0
SRR8523070	RS-SF11089/13	vegetables	food	2013	Salmonella enterica	enterica	Enteritidis	Enteritidis	>>>>>>>>>>>>	0	0	0	0	0	0	0	0	0	0	0	0	0	0	0	0	0	0	0	0	0	0	0	0	0	0	0	0	0	0	0	0	0	0	0	0	0	0	0	0
SRR8523072	RS-SF00991/12	beef	animal-based food	2012	Salmonella enterica	enterica	Enteritidis	Enteritidis	>>>>>>>>>>>>	0	0	0	0	0	0	0	0	0	0	0	0	0	0	0	0	0	0	0	0	0	0	0	0	0	0	0	0	0	0	0	0	0	0	0	0	0	0	0	0
SRR8523074	RS-SF15875/10	cheese	animal-based food	2010	Salmonella enterica	enterica	Enteritidis	Enteritidis	>>>>>>>>>>>>	0	0	0	0	0	0	0	0	0	0	0	0	0	0	0	0	0	0	0	0	0	0	0	0	0	0	0	0	0	0	0	0	0	0	0	0	0	0	0	0
SRR8523076	RS-SF05140/14	Mayonnaise Salad	animal-based food	2014	Salmonella enterica	enterica	Typhimurium	Typhimurium	>>>>>>>>>>>>	0	0	0	0	0	0	0	0	0	0	0	0	0	0	0	0	0	0	0	0	0	0	0	0	0	0	0	0	0	0	0	0	0	0	0	0	0	0	0	0
SRR8523078	RS-SF13568/11	Cake	food	2011	Salmonella enterica	enterica	Enteritidis	Enteritidis	>>>>>>>>>>>>	0	0	0	0	0	0	0	0	0	0	0	0	0	0	0	0	0	0	0	0	0	0	0	0	0	0	0	0	0	0	0	0	0	0	0	0	0	0	0	0
SRR8523079	RS-SF01352/12	cheese	animal-based food	2012	Salmonella enterica	enterica	Enteritidis	Enteritidis	>>>>>>>>>>>>	0	0	0	0	0	0	0	0	0	0	0	0	0	0	0	0	0	0	0	0	0	0	0	0	0	0	0	0	0	0	0	0	0	0	0	0	0	0	0	0
SRR8523087	RS-SF03474/11	Mayonnaise Salad	animal-based food	2011	Salmonella enterica	enterica	Enteritidis	Enteritidis	>>>>>>>>>>>>	0	0	0	0	0	0	0	0	0	0	0	0	0	0	0	0	0	0	0	0	0	0	0	0	0	0	0	0	0	0	0	0	0	0	0	0	0	0	0	0
SRR8523088	RS-SF10794/13	corn	food	2013	Salmonella enterica	enterica	Enteritidis	Enteritidis	>>>>>>>>>>>>	0	0	0	0	0	0	0	0	0	0	0	0	0	0	0	0	0	0	0	0	0	0	0	0	0	0	0	0	0	0	0	0	0	0	0	0	0	0	0	0
SRR8523091	RS-SF01341/12	Cheeseburger	animal-based food	2012	Salmonella enterica	enterica	Enteritidis	Enteritidis	>>>>>>>>>>>>	0	0	0	0	0	0	0	0	0	0	0	0	0	0	0	0	0	0	0	0	0	0	0	0	0	0	0	0	0	0	0	0	0	0	0	0	0	0	0	0
SRR8523092	RS-SF05209/14	Sausage	animal-based food	2014	Salmonella enterica	enterica	Typhimurium	Typhimurium	>>>>>>>>>>>>	0	1	0	0	0	0	0	1	0	0	1	0	0	0	1	0	1	0	0	0	0	0	0	0	0	0	0	0	0	0	0	0	0	0	0	0	0	0	0	0
SRR8523096	RS-SF03089/11	cheese	animal-based food	2011	Salmonella enterica	enterica	Enteritidis	Enteritidis	>>>>>>>>>>>>	0	0	0	0	0	0	0	0	0	0	0	0	0	0	0	0	0	0	0	0	0	0	0	0	0	0	0	0	0	0	0	0	0	0	0	0	0	0	0	0
SRR8523097	RS-SF01156/13	Mayonnaise Salad	animal-based food	2013	Salmonella enterica	enterica	Enteritidis	Enteritidis	>>>>>>>>>>>>	0	0	0	0	0	0	0	0	0	0	0	0	0	0	0	0	0	0	0	0	0	0	0	0	0	0	0	0	0	0	0	0	0	0	0	0	0	0	0	0
SRR8523098	RS-SF12037/13	Sausage	animal-based food	2013	Salmonella enterica	enterica	Typhimurium	Typhimurium	>>>>>>>>>>>>	0	0	0	0	0	0	0	0	0	0	0	0	0	0	0	0	0	0	0	0	0	0	0	0	0	0	0	0	0	0	0	0	0	0	0	0	0	0	0	0
SRR8523101	RS-SF15595/10	Sausage	animal-based food	2010	Salmonella enterica	enterica	Enteritidis	Enteritidis	>>>>>>>>>>>>	0	0	0	0	0	0	0	0	0	0	0	0	0	0	0	0	0	0	0	0	0	0	0	0	0	0	0	0	0	0	0	0	0	0	0	0	0	0	0	0
SRR8523108	RS-SF11368/12	beef	animal-based food	2012	Salmonella enterica	enterica	Typhimurium	Typhimurium	>>>>>>>>>>>>	0	0	0	0	0	0	0	0	0	0	0	0	0	0	0	0	0	0	0	0	0	0	0	0	0	0	0	0	0	0	0	0	0	0	0	0	0	0	0	0
SRR8523110	13V1298	Imported frozen meat	animal-based food	2013	Salmonella enterica	enterica	Muenchen	Braenderup	>>>>>>>>>>>>	0	0	0	0	0	0	0	0	0	0	0	0	0	0	0	0	0	0	0	0	0	0	0	0	0	0	0	0	0	0	0	0	0	0	0	0	0	0	0	0
SRR8543997	NC_SK496	Chicken thigh and drumstick	animal-based food	2016	Salmonella enterica	enterica	Kentucky	Minnesota	>>>>>>>>>>>>	0	0	0	0	0	1	0	0	0	0	0	0	0	0	0	0	0	0	0	0	0	0	0	0	0	1	0	0	0	0	0	1	0	0	0	0	0	0	0	0
SRR8544062	ULBRA-SF323	Chicken cake	animal-based food	2008	Salmonella enterica	enterica	Enteritidis	Enteritidis	>>>>>>>>>>>>	0	0	0	0	0	0	0	0	0	0	0	0	0	0	0	0	0	0	0	0	0	0	0	0	0	0	0	0	0	0	0	0	0	0	0	0	0	0	0	0
SRR8544152	ULBRA-SF305	Bacon	animal-based food	2007	Salmonella enterica	enterica	Enteritidis	Enteritidis	>>>>>>>>>>>>	0	0	0	0	0	0	0	0	0	0	0	0	0	0	0	0	0	0	0	0	0	0	0	0	0	0	0	0	0	0	0	0	0	0	0	0	0	0	0	0
SRR8544154	ULBRA-SA292/2	Viscera	animal-based food	2018	Salmonella enterica	enterica	Gallinarum	Gallinarum	>>>>>>>>>>>>	0	0	0	0	0	0	0	0	0	0	0	0	0	0	0	0	0	0	0	0	0	0	0	0	0	0	0	0	0	0	0	0	0	0	0	0	0	1	0	0
SRR8544157	ULBRA-SA290/2	Viscera	animal-based food	2017	Salmonella enterica	enterica	Gallinarum	Gallinarum	>>>>>>>>>>>>	0	0	0	0	0	0	0	0	0	0	0	0	0	0	0	0	0	0	0	0	0	0	0	0	0	0	0	0	0	0	0	0	0	0	0	0	0	1	0	0
SRR8544162	ULBRA-SF304	Homemade mayonnaise	animal-based food	2007	Salmonella enterica	enterica	Enteritidis	Enteritidis	>>>>>>>>>>>>	0	0	0	0	0	0	0	0	0	0	0	0	0	0	0	0	0	0	0	0	0	0	0	0	0	0	0	0	0	0	0	0	0	0	0	0	0	0	0	0
SRR8544173	ULBRA-SA291/2	Viscera	animal-based food	2018	Salmonella enterica	enterica	Gallinarum	Gallinarum	>>>>>>>>>>>>	0	0	0	0	0	0	0	0	0	0	0	0	0	0	0	0	0	0	0	0	0	0	0	0	0	0	0	0	0	0	0	0	0	0	0	0	0	1	0	0
SRR8544176	ULBRA-SF307	Pork, beef and roasted frankfurter	animal-based food	2007	Salmonella enterica	enterica	Enteritidis	Enteritidis	>>>>>>>>>>>>	0	0	0	0	0	0	0	0	0	0	0	0	0	0	0	0	0	0	0	0	0	0	0	0	0	0	0	0	0	0	0	0	0	0	0	0	0	0	0	0
SRR8544195	ULBRA-SF313	rice	food	2008	Salmonella enterica	enterica	Enteritidis	Enteritidis	>>>>>>>>>>>>	0	0	0	0	0	0	0	0	0	0	0	0	0	0	0	0	0	0	0	0	0	0	0	0	0	0	0	0	0	0	0	0	0	0	0	0	0	0	0	0
SRR8544209	ULBRA-SF310	Ham	animal-based food	2007	Salmonella enterica	enterica	Enteritidis	Enteritidis	>>>>>>>>>>>>	0	0	0	0	0	0	0	0	0	0	0	0	0	0	0	0	0	0	0	0	0	0	0	0	0	0	0	0	0	0	0	0	0	0	0	0	0	0	0	0
SRR8544210	ULBRA-SF318	Cookie cake	food	2008	Salmonella enterica	enterica	Enteritidis	Enteritidis	>>>>>>>>>>>>	0	0	0	0	0	0	0	0	0	0	0	0	0	0	0	0	0	0	0	0	0	0	0	0	0	0	0	0	0	0	0	0	0	0	0	0	0	0	0	0
SRR8544214	ULBRA-SF309	Mayonnaise	animal-based food	2007	Salmonella enterica	enterica	Enteritidis	Enteritidis	>>>>>>>>>>>>	0	0	0	0	0	0	0	0	0	0	0	0	0	0	0	0	0	0	0	0	0	0	0	0	0	0	0	0	0	0	0	0	0	0	0	0	0	0	0	0
SRR8544216	ULBRA-SF316	Cake	food	2008	Salmonella enterica	enterica	Enteritidis	Enteritidis	>>>>>>>>>>>>	0	0	0	0	0	0	0	0	0	0	0	0	0	0	0	0	0	0	0	0	0	0	0	0	0	0	0	0	0	0	0	0	0	0	0	0	0	0	0	0
SRR8544218	ULBRA-SF311	tomato	food	2007	Salmonella enterica	enterica	Enteritidis	Enteritidis	>>>>>>>>>>>>	0	0	0	0	0	0	0	0	0	0	0	0	0	0	0	0	0	0	0	0	0	0	0	0	0	0	0	0	0	0	0	0	0	0	0	0	0	0	0	0
SRR8544221	ULBRA-SF319	Beans	food	2008	Salmonella enterica	enterica	Enteritidis	Enteritidis	>>>>>>>>>>>>	0	0	0	0	0	0	0	0	0	0	0	0	0	0	0	0	0	0	0	0	0	0	0	0	0	0	0	0	0	0	0	0	0	0	0	0	0	0	0	0
SRR8544223	ULBRA-SF315	Eggs	animal-based food	2008	Salmonella enterica	enterica	Enteritidis	Enteritidis	>>>>>>>>>>>>	0	0	0	0	0	0	0	0	0	0	0	0	0	0	0	0	0	0	0	0	0	0	0	0	0	0	0	0	0	0	0	0	0	0	0	0	0	0	0	0
SRR8544237	ULBRA-SF320	Beans	food	2008	Salmonella enterica	enterica	Enteritidis	Enteritidis	>>>>>>>>>>>>	0	0	0	0	0	0	0	0	0	0	0	0	0	0	0	0	0	0	0	0	0	0	0	0	0	0	0	0	0	0	0	0	0	0	0	0	0	0	0	0
SRR8544244	ULBRA-SF321	food	food	2008	Salmonella enterica	enterica	Enteritidis	Enteritidis	>>>>>>>>>>>>	0	0	1	0	0	0	0	1	1	0	1	0	0	0	0	0	0	0	0	0	0	0	0	0	0	0	0	0	0	0	0	0	0	0	0	0	0	0	0	0
SRR8544258	ULBRA-SF308	beef	animal-based food	2007	Salmonella enterica	enterica	Enteritidis	Enteritidis	>>>>>>>>>>>>	0	0	0	0	0	0	0	0	0	0	0	0	0	0	0	0	0	0	0	0	0	0	0	0	0	0	0	0	0	0	0	0	0	0	0	0	0	0	0	0
SRR8544267	ULBRA-SF312	Cake	food	2008	Salmonella enterica	enterica	Enteritidis	Enteritidis	>>>>>>>>>>>>	0	0	0	0	0	0	0	0	0	0	0	0	0	0	0	0	0	0	0	0	0	0	0	0	0	0	0	0	0	0	0	0	0	0	0	0	0	0	0	0
SRR8544465	ULBRA-SF314	Roasted beef	animal-based food	2008	Salmonella enterica	enterica	Enteritidis	Enteritidis	>>>>>>>>>>>>	0	0	0	0	0	0	0	0	0	0	0	0	0	0	0	0	0	0	0	0	0	0	0	0	0	0	0	0	0	0	0	0	0	0	0	0	0	0	0	0
SRR8544466	ULBRA-SF322	Homemade Mayonnaise	animal-based food	2008	Salmonella enterica	enterica	Enteritidis	Enteritidis	>>>>>>>>>>>>	0	0	0	0	0	0	0	0	0	0	0	0	0	0	0	0	0	0	0	0	0	0	0	0	0	0	0	0	0	0	0	0	0	0	0	0	0	0	0	0
SRR8582557	UFRGS-SA049	Carcasses (Swine)	animal-based food	2014	Salmonella enterica	enterica	Typhimurium	Typhimurium	>>>>>>>>>>>>	0	1	0	0	0	0	1	1	0	1	1	0	0	0	1	0	0	0	0	0	0	0	0	0	0	0	0	0	0	0	0	0	0	0	0	1	0	0	0	0
[truncated: 56 more columns]

## Sheet: S2
Resistance gene	Animal-based food % (n/374)	Clinical-human % (n/249)	Clinical-animal % (n/133)	Environment % (n/110)	Food % (n/64)	Total % (n/930)
aac(3)-IIa	2.1 (8)	0.0 (0)	0.8 (1)	0.0 (0)	1.6 (1)	1.1 (10)
aac(3)-IId	2.1 (8)	0.0 (0)	0.0 (0)	0.0 (0)	0.0 (0)	0.9 (8)
aac(3)-IV	4.3 (16)	1.2 (3)	4.5 (6)	0.0 (0)	4.7 (3)	3.0 (28)
aac(3)-VIa	1.6 (6)	0.0 (0)	0.8 (1)	0.0 (0)	0.0 (0)	0.8 (7)
aac(6')-Ib	0.5 (2)	0.8 (2)	0.8 (1)	0.0 (0)	0.0 (0)	0.5 (5)
aph(3')-Ia	3.5 (13)	1.6 (4)	3.8 (5)	1.8 (2)	3.1 (2)	2.8 (26)
aph(3')-IIa	2.1 (8)	0.4 (1)	1.5 (2)	0.9 (1)	0.0 (0)	1.3 (12)
aph(3'')-Ib	10.2 (38)	5.2 (13)	8.3 (11)	5.5 (6)	7.8 (5)	7.8 (73)
aph(4)-Ia	5.3 (20)	1.2 (3)	4.5 (6)	0.0 (0)	4.7 (3)	3.4 (32)
aph(6)-Ic	1.3 (5)	0.4 (1)	0.8 (1)	0.9 (1)	0.0 (0)	0.9 (8)
aph(6)-Id	11.0 (41)	5.2 (13)	9.0 (12)	4.5 (5)	7.8 (5)	8.2 (76)
ant(2'')-Ia	0.0 (0)	1.2 (3)	0.0 (0)	0.0 (0)	0.0 (0)	0.3 (3)
ant(3'')-Ia	2.9 (11)	0.4 (1)	1.5 (2)	0.0 (0)	0.0 (0)	1.5 (14)
aadA1	6.4 (24)	4.8 (12)	3.8 (5)	0.9 (1)	1.6 (1)	4.6 (43)
aadA2	5.3 (20)	0.4 (1)	3.0 (4)	1.8 (2)	1.6 (1)	3.0 (28)
aadA5	0.3 (1)	0.0 (0)	0.0 (0)	0.0 (0)	1.6 (1)	0.2 (2)
aadA12	0.8 (3)	0.0 (0)	0.0 (0)	0.0 (0)	0.0 (0)	0.3 (3)
aadA22	0.3 (1)	0.0 (0)	0.0 (0)	0.0 (0)	0.0 (0)	0.1 (1)
dfrA1	5.9 (22)	4.8 (12)	4.5 (6)	0.9 (1)	0.0 (0)	4.4 (41)
dfrA7	0.0 (0)	0.0 (0)	0.0 (0)	0.9 (1)	0.0 (0)	0.1 (1)
dfrA8	1.3 (5)	1.6 (4)	0.8 (1)	0.0 (0)	1.6 (1)	1.2 (11)
dfrA12	2.9 (11)	0.4 (1)	3.8 (5)	1.8 (2)	3.1 (2)	2.3 (21)
dfrA15	0.0 (0)	0.4 (1)	0.0 (0)	0.0 (0)	0.0 (0)	0.1 (1)
dfrA17	0.3 (1)	0.0 (0)	0.0 (0)	0.0 (0)	1.6 (1)	0.2 (2)
dfrA25	0.3 (1)	0.4 (1)	0.0 (0)	0.0 (0)	0.0 (0)	0.2 (2)
blaCMY-2	8.8 (33)	0.0 (0)	6.0 (8)	37.3 (41)	0.0 (0)	8.8 (82)
blaCMY-18	0.0 (0)	0.0 (0)	0.8 (1)	0.0 (0)	0.0 (0)	0.1 (1)
blaCMY-33	0.0 (0)	0.0 (0)	0.0 (0)	0.9 (1)	0.0 (0)	0.1 (1)
blaCMY-44	6.1 (23)	0.0 (0)	0.0 (0)	0.9 (1)	0.0 (0)	2.6 (24)
blaCMY-54	1.3 (5)	0.0 (0)	0.0 (0)	0.9 (1)	0.0 (0)	0.6 (6)
blaCTX-M-2	0.8 (3)	0.0 (0)	0.8 (1)	0.0 (0)	0.0 (0)	0.4 (4)
blaCTX-M-8	1.6 (6)	0.8 (2)	0.0 (0)	1.8 (2)	0.0 (0)	1.1 (10)
blaCTX-M-56	1.3 (5)	0.0 (0)	0.0 (0)	0.0 (0)	1.6 (1)	0.6 (6)
blaCTX-M-97	0.3 (1)	0.0 (0)	0.0 (0)	0.0 (0)	0.0 (0)	0.1 (1)
blaTEM-1A	2.9 (11)	2.8 (7)	0.8 (1)	2.7 (3)	1.6 (1)	2.5 (23)
blaTEM-1B	7.5 (28)	3.2 (8)	5.3 (7)	4.5 (5)	1.6 (1)	5.3 (49)
blaTEM-116	0.0 (0)	0.4 (1)	3.0 (4)	0.9 (1)	1.6 (1)	0.8 (7)
blaTEM-220	0.8 (3)	0.0 (0)	0.0 (0)	0.0 (0)	0.0 (0)	0.3 (3)
blaTEM-229	0.0 (0)	0.0 (0)	0.8 (1)	0.0 (0)	0.0 (0)	0.1 (1)
blaOXA-4	0.3 (1)	1.6 (4)	0.8 (1)	0.0 (0)	0.0 (0)	0.6 (6)
blaOXA-17	0.5 (2)	0.8 (2)	0.8 (1)	0.0 (0)	0.0 (0)	0.5 (5)
catA1	2.7 (10)	2.8 (7)	1.5 (2)	0.9 (1)	0.0 (0)	2.2 (20)
cmlA1	2.1 (8)	0.0 (0)	0.8 (1)	0.0 (0)	1.6 (1)	1.1 (10)
erm(42)	0.3 (1)	0.0 (0)	0.8 (1)	0.0 (0)	1.6 (1)	0.3 (3)
floR	6.1 (23)	1.2 (3)	2.3 (3)	2.7 (3)	1.6 (1)	3.5 (33)
lnu(G)	2.1 (8)	0.0 (0)	1.5 (2)	1.8 (2)	0.0 (0)	1.3 (12)
mph(A)	0.0 (0)	0.0 (0)	0.8 (1)	0.0 (0)	0.0 (0)	0.1 (1)
tet(A)	25.9 (97)	5.2 (13)	15.8 (21)	49.1 (54)	4.7 (3)	20.2 (188)
tet(B)	11.2 (42)	6.0 (15)	3.8 (5)	3.6 (4)	4.7 (3)	7.4 (69)
tet(C)	0.3 (1)	2.8 (7)	2.3 (3)	0.0 (0)	0.0 (0)	1.2 (11)
tet(D)	0.0 (0)	0.0 (0)	0.0 (0)	0.0 (0)	1.6 (1)	0.1 (1)
mcr-1.1	0.3 (1)	0.0 (0)	0.0 (0)	0.0 (0)	0.0 (0)	0.1 (1)
mcr-9	0.3 (1)	0.0 (0)	0.8 (1)	0.0 (0)	0.0 (0)	0.2 (2)
fosA3	0.8 (3)	0.0 (0)	0.0 (0)	0.0 (0)	0.0 (0)	0.3 (3)
fosA7	19.8 (74)	0.0 (0)	6.8 (9)	50.9 (56)	0.0 (0)	14.9 (139)
qnrB2	0.5 (2)	0.4 (1)	0.0 (0)	0.0 (0)	0.0 (0)	0.3 (3)
qnrB19	8.0 (30)	0.0 (0)	1.5 (2)	2.7 (3)	1.6 (1)	3.9 (36)
qnrE1	1.6 (6)	0.0 (0)	1.5 (2)	0.0 (0)	0.0 (0)	0.9 (8)
qnrS1	0.5 (2)	0.0 (0)	0.0 (0)	0.0 (0)	0.0 (0)	0.2 (2)
aac(6')-Ib-cr	0.5 (2)	0.8 (2)	0.8 (1)	0.0 (0)	0.0 (0)	0.5 (5)
oqxA	1.6 (6)	1.2 (3)	0.8 (1)	0.9 (1)	1.6 (1)	1.3 (12)
oqxB	1.9 (7)	1.2 (3)	0.8 (1)	0.9 (1)	1.6 (1)	1.4 (13)
sul1	9.1 (34)	3.6 (9)	6.0 (8)	0.9 (1)	3.1 (2)	5.8 (54)
sul2	21.4 (80)	2.4 (6)	9.8 (13)	50.0 (55)	4.7 (3)	16.9 (157)
sul3	2.9 (11)	0.0 (0)	2.3 (3)	1.8 (2)	1.6 (1)	1.8 (17)
